# Supplementary material for: Cohort profile: the Australian genetics of depression study
Source: PubMed Central journal article supplement — BMJ Open. 2020 May 26;10(5):e032580. doi: 10.1136/bmjopen-2019-032580 (PMC7259831; doi:10.1136/bmjopen-2019-032580), 2020-05-26
Supplement: bmjopen-2019-032580supp001.pdf [file bmjopen-2019-032580supp001.pdf]

# **MDD PROJECT**

## **GENETICS OF RISK AND RESPONSE TO TREATMENT OF DEPRESSION**

### **QUESTIONNAIRE STRUCTURE AND SPSS DATAFILE CODING MANUAL**

## Table of Contents

|                                                        |     |
|--------------------------------------------------------|-----|
| How to Use this Manual.....                            | 3   |
| Introduction.....                                      | 4   |
| Module 1 – Core .....                                  | 5   |
| Module 1b – Anxiety Disorders .....                    | 50  |
| Module 12 – General and Physical Health .....          | 56  |
| Module 2 – Alcohol, tobacco and other substances ..... | 59  |
| Module 3 – Experiences of health care.....             | 93  |
| Module 4 – Thoughts, feelings and behaviours .....     | 97  |
| Module 5 – Life Events.....                            | 107 |
| Module 6 – Work and Sleep .....                        | 118 |
| Module 7 – General health and lifestyle .....          | 132 |
| Module 9 – Games and gambling .....                    | 160 |
| Module 10 – Headaches and migraine.....                | 170 |
| Module 11 – Family .....                               | 174 |
| Finalise and submit survey .....                       | 177 |

## How to Use this Manual

This manual describes the contents of the online questionnaire completed by MDD study participants. It includes:

- Questionnaire structure;
- Item numbers;
- Item text;
- Skip logic; and
- Coding of data in the MDD SPSS data set (after export and recoding)

Item numbers (Qxxx) refer to the question numbers assigned sequentially to the individual questionnaire items in the Qualtrics questionnaire.

Blue text denotes the variable name corresponding to the item in the MDD SPSS data set.

Skip logic instructions are denoted by lines of asterisks (\*\*\*\*\*) above and below. Skip logic algorithms are in magenta text.

## Introduction

Q1 NOT USED FOR PARTICIPANT INPUT Autocoded .....1

---

Q2 Browser Meta Info

|           |                   |       |
|-----------|-------------------|-------|
| Q2_1_TEXT | Browser           | _____ |
| Q2_2_TEXT | Browser version   | _____ |
| Q2_3_TEXT | Operating system  | _____ |
| Q2_4_TEXT | Screen resolution | _____ |
| Q2_5_TEXT | Flash version     | _____ |
| Q2_6_TEXT | Java support      | _____ |
| Q2_7_TEXT | User agent        | _____ |

---

Q3 Welcome to the online questionnaire. Thank you for taking the time to assist us in our research on depression. Autocoded .....1

The questionnaire that follows is the core module. It should take approximately 10 to 15 minutes to complete.

To make it easier for you to participate, you can start the questionnaire, log off and return to it later by clicking on the link in the e-mail we have sent you. This link will return you to the last question you answered in the questionnaire.

Please note that if you would like to complete the questionnaire over multiple sessions, you need to use the same device and browser, which must have 'Cookies' enabled. Some devices have cookies disabled as a default setting, while specific Internet settings such as 'private browsing' also disable cookies. You may need to check your device and browser settings if intending to do the survey over multiple sessions.

Once this core questionnaire is completed you will be presented with a table of contents containing several modules. You may complete the other modules in any order you like. Depending on your answers, the series of modules should take around 60 minutes to complete. Once again, you can start and leave these modules as you please using the questionnaire link we emailed you.

Please consider your answers carefully, as you cannot go back during the questionnaire. Please do not use the "back" button on your internet browser.

Should you have any technical difficulties in completing the questionnaire, please contact the project coordinator at QIMR Berghofer Medical Research Institute, via the contact details in the e-mail we have sent you.

**Module 1 – Core**

**Q4** Are you male or female? Male .....1  
Female .....2  
Unspecified .....3

Note: This question refers to biological sex, not gender.  
Responses to this question are used to select questionnaire items that may be relevant to the medical history of the participant.

**Q5** How old are you now? \_\_\_/\_\_\_/\_\_\_ YEARS

**Q6** What is your marital status? Married .....1  
Separated .....2  
Divorced .....3  
Widowed .....4  
Never married .....5  
Living with partner/defacto (for a period of six months or longer) .....6

\*\*\*\*\*  
IF MALE (Q4 = 1) GO TO Q8 ELSE CONTINUE  
\*\*\*\*\*

**Q7** Have you ever been pregnant? No .....1  
Yes .....2

**Q8** Have you ever talked to a doctor or psychologist about your mental health? No .....1  
Yes .....2  
Don't know .....3

\*\*\*\*\*  
IF NEVER TALKED WITH DOCTOR OR PSYCHOLOGIST (Q8 ≠ 2),  
GO TO Q10 ELSE CONTINUE  
\*\*\*\*\*

|       |                                                                                                         |            |
|-------|---------------------------------------------------------------------------------------------------------|------------|
| Q9    | Have you ever been diagnosed with any of the following?<br>Please select all that apply.                |            |
| Q9_1  | Depression                                                                                              | Yes .....1 |
| Q9_2  | Bipolar disorder                                                                                        | Yes .....1 |
| Q9_3  | Premenstrual dysphoric mood disorder (WOMEN ONLY)                                                       | Yes .....1 |
| Q9_4  | Schizophrenia                                                                                           | Yes .....1 |
| Q9_5  | Anorexia nervosa                                                                                        | Yes .....1 |
| Q9_6  | Bulimia                                                                                                 | Yes .....1 |
| Q9_7  | Attention-deficit/hyperactivity disorder (ADD/ADHD)                                                     | Yes .....1 |
| Q9_8  | Autism spectrum disorder (Autism, Asperger's disorder)                                                  | Yes .....1 |
| Q9_9  | Tourette's disorder                                                                                     | Yes .....1 |
| Q9_10 | Anxiety disorder (Generalised anxiety disorder)                                                         | Yes .....1 |
| Q9_11 | Panic disorder                                                                                          | Yes .....1 |
| Q9_12 | Obsessive compulsive disorder                                                                           | Yes .....1 |
| Q9_13 | Hoarding disorder                                                                                       | Yes .....1 |
| Q9_14 | Posttraumatic stress disorder (PTSD)                                                                    | Yes .....1 |
| Q9_15 | Specific phobia (e.g. animals, heights, storms, blood /<br>injection / injury, flying, enclosed spaces) | Yes .....1 |
| Q9_16 | Seasonal affective disorder (SAD)                                                                       | Yes .....1 |
| Q9_17 | Social anxiety disorder (also known as Social phobia)                                                   | Yes .....1 |
| Q9_18 | Agoraphobia                                                                                             | Yes .....1 |
| Q9_19 | Personality disorder                                                                                    | Yes .....1 |
| Q9_20 | Substance use disorder                                                                                  | Yes .....1 |
| Q9_21 | None of the above                                                                                       | Yes .....1 |

|        |                                                                                                                                             |            |
|--------|---------------------------------------------------------------------------------------------------------------------------------------------|------------|
| Q10    | Have you ever taken any of the following antidepressants<br>(even if it wasn't for depression or anxiety)? Please select<br>all that apply. |            |
| Q10_1  | Sertraline (e.g. Zoloft, Eleva, Sertra, Sertracor, Setrona,<br>Xydep)                                                                       | Yes .....1 |
| Q10_2  | Escitalopram (e.g. Lexapro, Cilopam, Escicor, Esipram,<br>Esitalo, Lexam, LoxaLate)                                                         | Yes .....1 |
| Q10_3  | Venlafaxine (e.g. Efexor, Altven, Elaxine, Enlafax, Venla,<br>Venlexor)                                                                     | Yes .....1 |
| Q10_4  | Amitriptyline (e.g. Endep)                                                                                                                  | Yes .....1 |
| Q10_5  | Mirtazapine (e.g. Avanza, Remeron, Milivin, Axit,<br>Aurozapine, Mirtazon)                                                                  | Yes .....1 |
| Q10_6  | Desvenlafaxine (e.g. Pristiq, Desfax)                                                                                                       | Yes .....1 |
| Q10_7  | Citalopram (e.g. Cipramil, Celapram, Celica, Ciazil, Citalo,<br>Talam)                                                                      | Yes .....1 |
| Q10_8  | Fluoxetine (e.g. Prozac, Auscap, Lovan, Zactin)                                                                                             | Yes .....1 |
| Q10_9  | Duloxetine (e.g. Cymbalta, Andeptra, Coperin, Deotine,<br>Depreta, Drulox)                                                                  | Yes .....1 |
| Q10_10 | Paroxetine (e.g. Aropax, Paxtine, Extine, Roxet)                                                                                            | Yes .....1 |
| Q10_11 | A different antidepressant that isn't listed above                                                                                          | Yes .....1 |
| Q10_12 | I have never taken antidepressants                                                                                                          | Yes .....1 |

\*\*\*\*\*  
 IF NEVER TAKEN ANTIDEPRESSANTS (Q10\_12 = 1), GO TO Q30  
 ELSE IF DIFFERENT ANTIDEPRESSANT (Q10\_11 = 1), GO TO Q11  
 ELSE GO TO Q12  
 \*\*\*\*\*

|        |                                                                                                                                       |            |
|--------|---------------------------------------------------------------------------------------------------------------------------------------|------------|
| Q11    | Have you ever taken any of the following antidepressants (even if it wasn't for depression or anxiety)? Please select all that apply. |            |
| Q11_1  | Dothiepin (e.g. Dothep)                                                                                                               | Yes .....1 |
| Q11_2  | Fluvoxamine (e.g. Luvox, Faverin, Movox, Voxam)                                                                                       | Yes .....1 |
| Q11_3  | Doxepin (e.g. Sinequan, Deptran)                                                                                                      | Yes .....1 |
| Q11_4  | Nortriptyline (e.g. Allegron)                                                                                                         | Yes .....1 |
| Q11_5  | Moclobemide (e.g. Amina, Clobemix, Mohexal, Aurorix)                                                                                  | Yes .....1 |
| Q11_6  | Clomipramine (e.g. Anafranil, Placil)                                                                                                 | Yes .....1 |
| Q11_7  | Reboxetine (e.g. Edronax)                                                                                                             | Yes .....1 |
| Q11_8  | Mianserin (e.g. Lumin)                                                                                                                | Yes .....1 |
| Q11_9  | Imipramine (e.g. Tofranil, Tolerade)                                                                                                  | Yes .....1 |
| Q11_10 | Tranlycypromine (e.g. Parnate)                                                                                                        | Yes .....1 |
| Q11_11 | Phenelzine (e.g. Nardil)                                                                                                              | Yes .....1 |
| Q11_12 | A different antidepressant that isn't listed above                                                                                    | Yes .....1 |

\*\*\*\*\*  
 IF EVER TAKEN ANY ANTIDEPRESSANTS (ANY OF Q10\_1 TO Q10\_11 = 1  
 OR ANY OF Q11\_1 TO Q11\_12 = 1), CONTINUE  
 ELSE GO TO Q30  
 \*\*\*\*\*

|     |                                                                                                   |                                              |
|-----|---------------------------------------------------------------------------------------------------|----------------------------------------------|
| Q12 | When you were taking these antidepressants, were you also taking any other prescribed medication? | No .....1<br>Yes .....2<br>Don't know .....3 |
|-----|---------------------------------------------------------------------------------------------------|----------------------------------------------|

\*\*\*\*\*  
 IF TAKING OTHER MEDICATION (Q12 = 2) CONTINUE,  
 ELSE GO TO Q14  
 \*\*\*\*\*

|        |                                                                                                  |            |
|--------|--------------------------------------------------------------------------------------------------|------------|
| Q13    | Have you ever taken any of the following medications while you were also taking antidepressants? |            |
| Q13_1  | Largactil, Modecate, Stelazine or Neulactil                                                      | Yes .....1 |
| Q13_2  | Haloperidol (e.g. Serenace, Haldol decanoate)                                                    | Yes .....1 |
| Q13_3  | Latuda or Zeldox                                                                                 | Yes .....1 |
| Q13_4  | Fluanxol Depot or Clopixol Depot                                                                 | Yes .....1 |
| Q13_5  | Asenapine (e.g. Saphris)                                                                         | Yes .....1 |
| Q13_6  | Olanzapine (e.g. Lanzek, Ozin, Zypine, Zyprexa)                                                  | Yes .....1 |
| Q13_7  | Quetiapine (e.g. Delucon, Kaptan, Quetia, Quetiaccord, Seronia, Seroquel, Syquet)                | Yes .....1 |
| Q13_8  | Amisulpride (e.g. Solian, Sulprix)                                                               | Yes .....1 |
| Q13_9  | Aripiprazole (e.g. Abilify)                                                                      | Yes .....1 |
| Q13_10 | Paliperidone (e.g. Invega)                                                                       | Yes .....1 |
| Q13_11 | Risperidone (e.g. Ozidal, Rispa, Risperdal, Rispericor, Rispernia, Rixadone)                     | Yes .....1 |
| Q13_12 | Lithium carbonate (e.g. Lithicarb, Quilonum)                                                     | Yes .....1 |
| Q13_13 | Alprazolam (e.g. Alprax, Kalma)                                                                  | Yes .....1 |
| Q13_14 | Diazepam (e.g. Valium, Antenex, Ranzepam, Valpam)                                                | Yes .....1 |
| Q13_15 | Oxazepam (e.g. Serepax, Alepam, Murelax)                                                         | Yes .....1 |
| Q13_16 | Nitrazepam (e.g. Mogadon, Alodorm)                                                               | Yes .....1 |
| Q13_17 | Temazepam (e.g. Normison, Temaze, Temtabs)                                                       | Yes .....1 |

Q14 NOT USED FOR PARTICIPANT INPUT

\*\*\*\*\*  
 IF NO ANTIDEPRESSANT SELECTED AT Q10, GO TO Q22  
 \*\*\*\*\*

FOR EACH ANTIDEPRESSANT SELECTED AT Q10  
(ANY OF Q10\_1 TO Q10\_11 = 1), COMPLETE Q15 TO Q21  
\*\*\*\*\*



|                |                                                                               |            |
|----------------|-------------------------------------------------------------------------------|------------|
| Q15            | Why were you prescribed [X FROM Q10]? Please select all that apply.           |            |
| Q15_1_x1       | Sertraline prescribed for depression                                          | Yes .....1 |
| Q15_2_x1       | Sertraline prescribed for bipolar disorder                                    | Yes .....1 |
| Q15_3_x1       | Sertraline prescribed for anxiety                                             | Yes .....1 |
| Q15_4_x1       | Sertraline prescribed for panic disorder                                      | Yes .....1 |
| Q15_5_x1       | Sertraline prescribed for obsessive compulsive disorder                       | Yes .....1 |
| Q15_6_x1       | Sertraline prescribed for specific phobia                                     | Yes .....1 |
| Q15_7_x1       | Sertraline prescribed for posttraumatic stress disorder                       | Yes .....1 |
| Q15_8_x1       | Sertraline prescribed for premenstrual dysphoric mood disorder (WOMEN ONLY)   | Yes .....1 |
| Q15_9_x1       | Sertraline prescribed for menopausal symptoms (WOMEN ONLY)                    | Yes .....1 |
| Q15_10_x1      | Sertraline prescribed for chronic pain                                        | Yes .....1 |
| Q15_11_x1      | Sertraline prescribed for quitting smoking                                    | Yes .....1 |
| Q15_12_x1      | Sertraline prescribed for sleep problems (e.g. insomnia)                      | Yes .....1 |
| Q15_13_x1      | Sertraline prescribed for restless legs syndrome                              | Yes .....1 |
| Q15_14_x1      | Sertraline prescribed for premature ejaculation (MEN ONLY)                    | Yes .....1 |
| Q15_15_x1      | Sertraline prescribed for attention-deficit/hyperactivity disorder            | Yes .....1 |
| Q15_16_x1      | Sertraline prescribed for other reason                                        | Yes .....1 |
| Q15_16_TEXT_x1 | Other reason Sertraline was prescribed                                        | _____      |
| Q15_17_x1      | Participant unsure why Sertraline was prescribed                              | Yes .....1 |
| Q15_1_x2       | Escitalopram prescribed for depression                                        | Yes .....1 |
| Q15_2_x2       | Escitalopram prescribed for bipolar disorder                                  | Yes .....1 |
| Q15_3_x2       | Escitalopram prescribed for anxiety                                           | Yes .....1 |
| Q15_4_x2       | Escitalopram prescribed for panic disorder                                    | Yes .....1 |
| Q15_5_x2       | Escitalopram prescribed for obsessive compulsive disorder                     | Yes .....1 |
| Q15_6_x2       | Escitalopram prescribed for specific phobia                                   | Yes .....1 |
| Q15_7_x2       | Escitalopram prescribed for posttraumatic stress disorder                     | Yes .....1 |
| Q15_8_x2       | Escitalopram prescribed for premenstrual dysphoric mood disorder (WOMEN ONLY) | Yes .....1 |
| Q15_9_x2       | Escitalopram prescribed for menopausal symptoms (WOMEN ONLY)                  | Yes .....1 |
| Q15_10_x2      | Escitalopram prescribed for chronic pain                                      | Yes .....1 |
| Q15_11_x2      | Escitalopram prescribed for quitting smoking                                  | Yes .....1 |
| Q15_12_x2      | Escitalopram prescribed for sleep problems (e.g. insomnia)                    | Yes .....1 |
| Q15_13_x2      | Escitalopram prescribed for restless legs syndrome                            | Yes .....1 |
| Q15_14_x2      | Escitalopram prescribed for premature ejaculation (MEN ONLY)                  | Yes .....1 |
| Q15_15_x2      | Escitalopram prescribed for attention-deficit/hyperactivity disorder          | Yes .....1 |
| Q15_16_x2      | Escitalopram prescribed for other reason                                      | Yes .....1 |
| Q15_16_TEXT_x2 | Other reason Escitalopram was prescribed                                      | _____      |
| Q15_17_x2      | Participant unsure why Escitalopram was prescribed                            | Yes .....1 |
| Q15_1_x3       | Venlafaxine prescribed for depression                                         | Yes .....1 |
| Q15_2_x3       | Venlafaxine prescribed for bipolar disorder                                   | Yes .....1 |
| Q15_3_x3       | Venlafaxine prescribed for anxiety                                            | Yes .....1 |
| Q15_4_x3       | Venlafaxine prescribed for panic disorder                                     | Yes .....1 |
| Q15_5_x3       | Venlafaxine prescribed for obsessive compulsive disorder                      | Yes .....1 |
| Q15_6_x3       | Venlafaxine prescribed for specific phobia                                    | Yes .....1 |
| Q15_7_x3       | Venlafaxine prescribed for posttraumatic stress disorder                      | Yes .....1 |
| Q15_8_x3       | Venlafaxine prescribed for premenstrual dysphoric mood disorder (WOMEN ONLY)  | Yes .....1 |
| Q15_9_x3       | Venlafaxine prescribed for menopausal symptoms (WOMEN ONLY)                   | Yes .....1 |
| Q15_10_x3      | Venlafaxine prescribed for chronic pain                                       | Yes .....1 |
| Q15_11_x3      | Venlafaxine prescribed for quitting smoking                                   | Yes .....1 |
| Q15_12_x3      | Venlafaxine prescribed for sleep problems (e.g. insomnia)                     | Yes .....1 |
| Q15_13_x3      | Venlafaxine prescribed for restless legs syndrome                             | Yes .....1 |

|                |                                                                                 |           |   |
|----------------|---------------------------------------------------------------------------------|-----------|---|
| Q15_14_x3      | Venlafaxine prescribed for premature ejaculation (MEN ONLY)                     | Yes ..... | 1 |
| Q15_15_x3      | Venlafaxine prescribed for attention-deficit/hyperactivity disorder             | Yes ..... | 1 |
| Q15_16_x3      | Venlafaxine prescribed for other reason                                         | Yes ..... | 1 |
| Q15_16_TEXT_x3 | Other reason Venlafaxine was prescribed                                         | _____     |   |
| Q15_17_x3      | Participant unsure why Venlafaxine was prescribed                               | Yes ..... | 1 |
| Q15_1_x4       | Amitriptyline prescribed for depression                                         | Yes ..... | 1 |
| Q15_2_x4       | Amitriptyline prescribed for bipolar disorder                                   | Yes ..... | 1 |
| Q15_3_x4       | Amitriptyline prescribed for anxiety                                            | Yes ..... | 1 |
| Q15_4_x4       | Amitriptyline prescribed for panic disorder                                     | Yes ..... | 1 |
| Q15_5_x4       | Amitriptyline prescribed for obsessive compulsive disorder                      | Yes ..... | 1 |
| Q15_6_x4       | Amitriptyline prescribed for specific phobia                                    | Yes ..... | 1 |
| Q15_7_x4       | Amitriptyline prescribed for posttraumatic stress disorder                      | Yes ..... | 1 |
| Q15_8_x4       | Amitriptyline prescribed for premenstrual dysphoric mood disorder (WOMEN ONLY)  | Yes ..... | 1 |
| Q15_9_x4       | Amitriptyline prescribed for menopausal symptoms (WOMEN ONLY)                   | Yes ..... | 1 |
| Q15_10_x4      | Amitriptyline prescribed for chronic pain                                       | Yes ..... | 1 |
| Q15_11_x4      | Amitriptyline prescribed for quitting smoking                                   | Yes ..... | 1 |
| Q15_12_x4      | Amitriptyline prescribed for sleep problems (e.g. insomnia)                     | Yes ..... | 1 |
| Q15_13_x4      | Amitriptyline prescribed for restless legs syndrome                             | Yes ..... | 1 |
| Q15_14_x4      | Amitriptyline prescribed for premature ejaculation (MEN ONLY)                   | Yes ..... | 1 |
| Q15_15_x4      | Amitriptyline prescribed for attention-deficit/hyperactivity disorder           | Yes ..... | 1 |
| Q15_16_x4      | Amitriptyline prescribed for other reason                                       | Yes ..... | 1 |
| Q15_16_TEXT_x4 | Other reason Amitriptyline was prescribed                                       | _____     |   |
| Q15_17_x4      | Participant unsure why Amitriptyline was prescribed                             | Yes ..... | 1 |
| Q15_1_x5       | Mirtazapine prescribed for depression                                           | Yes ..... | 1 |
| Q15_2_x5       | Mirtazapine prescribed for bipolar disorder                                     | Yes ..... | 1 |
| Q15_3_x5       | Mirtazapine prescribed for anxiety                                              | Yes ..... | 1 |
| Q15_4_x5       | Mirtazapine prescribed for panic disorder                                       | Yes ..... | 1 |
| Q15_5_x5       | Mirtazapine prescribed for obsessive compulsive disorder                        | Yes ..... | 1 |
| Q15_6_x5       | Mirtazapine prescribed for specific phobia                                      | Yes ..... | 1 |
| Q15_7_x5       | Mirtazapine prescribed for posttraumatic stress disorder                        | Yes ..... | 1 |
| Q15_8_x5       | Mirtazapine prescribed for premenstrual dysphoric mood disorder (WOMEN ONLY)    | Yes ..... | 1 |
| Q15_9_x5       | Mirtazapine prescribed for menopausal symptoms (WOMEN ONLY)                     | Yes ..... | 1 |
| Q15_10_x5      | Mirtazapine prescribed for chronic pain                                         | Yes ..... | 1 |
| Q15_11_x5      | Mirtazapine prescribed for quitting smoking                                     | Yes ..... | 1 |
| Q15_12_x5      | Mirtazapine prescribed for sleep problems (e.g. insomnia)                       | Yes ..... | 1 |
| Q15_13_x5      | Mirtazapine prescribed for restless legs syndrome                               | Yes ..... | 1 |
| Q15_14_x5      | Mirtazapine prescribed for premature ejaculation (MEN ONLY)                     | Yes ..... | 1 |
| Q15_15_x5      | Mirtazapine prescribed for attention-deficit/hyperactivity disorder             | Yes ..... | 1 |
| Q15_16_x5      | Mirtazapine prescribed for other reason                                         | Yes ..... | 1 |
| Q15_16_TEXT_x5 | Other reason Mirtazapine was prescribed                                         | _____     |   |
| Q15_17_x5      | Participant unsure why Mirtazapine was prescribed                               | Yes ..... | 1 |
| Q15_1_x6       | Desvenlafaxine prescribed for depression                                        | Yes ..... | 1 |
| Q15_2_x6       | Desvenlafaxine prescribed for bipolar disorder                                  | Yes ..... | 1 |
| Q15_3_x6       | Desvenlafaxine prescribed for anxiety                                           | Yes ..... | 1 |
| Q15_4_x6       | Desvenlafaxine prescribed for panic disorder                                    | Yes ..... | 1 |
| Q15_5_x6       | Desvenlafaxine prescribed for obsessive compulsive disorder                     | Yes ..... | 1 |
| Q15_6_x6       | Desvenlafaxine prescribed for specific phobia                                   | Yes ..... | 1 |
| Q15_7_x6       | Desvenlafaxine prescribed for posttraumatic stress disorder                     | Yes ..... | 1 |
| Q15_8_x6       | Desvenlafaxine prescribed for premenstrual dysphoric mood disorder (WOMEN ONLY) | Yes ..... | 1 |

|                |                                                                             |            |
|----------------|-----------------------------------------------------------------------------|------------|
| Q15_9_x6       | Desvenlafaxine prescribed for menopausal symptoms (WOMEN ONLY)              | Yes .....1 |
| Q15_10_x6      | Desvenlafaxine prescribed for chronic pain                                  | Yes .....1 |
| Q15_11_x6      | Desvenlafaxine prescribed for quitting smoking                              | Yes .....1 |
| Q15_12_x6      | Desvenlafaxine prescribed for sleep problems (e.g. insomnia)                | Yes .....1 |
| Q15_13_x6      | Desvenlafaxine prescribed for restless legs syndrome                        | Yes .....1 |
| Q15_14_x6      | Desvenlafaxine prescribed for premature ejaculation (MEN ONLY)              | Yes .....1 |
| Q15_15_x6      | Desvenlafaxine prescribed for attention-deficit/hyperactivity disorder      | Yes .....1 |
| Q15_16_x6      | Desvenlafaxine prescribed for other reason                                  | Yes .....1 |
| Q15_16_TEXT_x6 | Other reason Desvenlafaxine was prescribed                                  | .....1     |
| Q15_17_x6      | Participant unsure why Desvenlafaxine was prescribed                        | Yes .....1 |
| Q15_1_x7       | Citalopram prescribed for depression                                        | Yes .....1 |
| Q15_2_x7       | Citalopram prescribed for bipolar disorder                                  | Yes .....1 |
| Q15_3_x7       | Citalopram prescribed for anxiety                                           | Yes .....1 |
| Q15_4_x7       | Citalopram prescribed for panic disorder                                    | Yes .....1 |
| Q15_5_x7       | Citalopram prescribed for obsessive compulsive disorder                     | Yes .....1 |
| Q15_6_x7       | Citalopram prescribed for specific phobia                                   | Yes .....1 |
| Q15_7_x7       | Citalopram prescribed for posttraumatic stress disorder                     | Yes .....1 |
| Q15_8_x7       | Citalopram prescribed for premenstrual dysphoric mood disorder (WOMEN ONLY) | Yes .....1 |
| Q15_9_x7       | Citalopram prescribed for menopausal symptoms (WOMEN ONLY)                  | Yes .....1 |
| Q15_10_x7      | Citalopram prescribed for chronic pain                                      | Yes .....1 |
| Q15_11_x7      | Citalopram prescribed for quitting smoking                                  | Yes .....1 |
| Q15_12_x7      | Citalopram prescribed for sleep problems (e.g. insomnia)                    | Yes .....1 |
| Q15_13_x7      | Citalopram prescribed for restless legs syndrome                            | Yes .....1 |
| Q15_14_x7      | Citalopram prescribed for premature ejaculation (MEN ONLY)                  | Yes .....1 |
| Q15_15_x7      | Citalopram prescribed for attention-deficit/hyperactivity disorder          | Yes .....1 |
| Q15_16_x7      | Citalopram prescribed for other reason                                      | Yes .....1 |
| Q15_16_TEXT_x7 | Other reason Citalopram was prescribed                                      | .....1     |
| Q15_17_x7      | Participant unsure why Citalopram was prescribed                            | Yes .....1 |
| Q15_1_x8       | Fluoxetine prescribed for depression                                        | Yes .....1 |
| Q15_2_x8       | Fluoxetine prescribed for bipolar disorder                                  | Yes .....1 |
| Q15_3_x8       | Fluoxetine prescribed for anxiety                                           | Yes .....1 |
| Q15_4_x8       | Fluoxetine prescribed for panic disorder                                    | Yes .....1 |
| Q15_5_x8       | Fluoxetine prescribed for obsessive compulsive disorder                     | Yes .....1 |
| Q15_6_x8       | Fluoxetine prescribed for specific phobia                                   | Yes .....1 |
| Q15_7_x8       | Fluoxetine prescribed for posttraumatic stress disorder                     | Yes .....1 |
| Q15_8_x8       | Fluoxetine prescribed for premenstrual dysphoric mood disorder (WOMEN ONLY) | Yes .....1 |
| Q15_9_x8       | Fluoxetine prescribed for menopausal symptoms (WOMEN ONLY)                  | Yes .....1 |
| Q15_10_x8      | Fluoxetine prescribed for chronic pain                                      | Yes .....1 |
| Q15_11_x8      | Fluoxetine prescribed for quitting smoking                                  | Yes .....1 |
| Q15_12_x8      | Fluoxetine prescribed for sleep problems (e.g. insomnia)                    | Yes .....1 |
| Q15_13_x8      | Fluoxetine prescribed for restless legs syndrome                            | Yes .....1 |
| Q15_14_x8      | Fluoxetine prescribed for premature ejaculation (MEN ONLY)                  | Yes .....1 |
| Q15_15_x8      | Fluoxetine prescribed for attention-deficit/hyperactivity disorder          | Yes .....1 |
| Q15_16_x8      | Fluoxetine prescribed for other reason                                      | Yes .....1 |
| Q15_16_TEXT_x8 | Other reason Fluoxetine was prescribed                                      | .....1     |
| Q15_17_x8      | Participant unsure why Fluoxetine was prescribed                            | Yes .....1 |
| Q15_1_x9       | Duloxetine prescribed for depression                                        | Yes .....1 |
| Q15_2_x9       | Duloxetine prescribed for bipolar disorder                                  | Yes .....1 |
| Q15_3_x9       | Duloxetine prescribed for anxiety                                           | Yes .....1 |

|                 |                                                                             |                   |
|-----------------|-----------------------------------------------------------------------------|-------------------|
| Q15_4_x9        | Duloxetine prescribed for panic disorder                                    | Yes .....1        |
| Q15_5_x9        | Duloxetine prescribed for obsessive compulsive disorder                     | Yes .....1        |
| Q15_6_x9        | Duloxetine prescribed for specific phobia                                   | Yes .....1        |
| Q15_7_x9        | Duloxetine prescribed for posttraumatic stress disorder                     | Yes .....1        |
| Q15_8_x9        | Duloxetine prescribed for premenstrual dysphoric mood disorder (WOMEN ONLY) | Yes .....1        |
| Q15_9_x9        | Duloxetine prescribed for menopausal symptoms (WOMEN ONLY)                  | Yes .....1        |
| Q15_10_x9       | Duloxetine prescribed for chronic pain                                      | Yes .....1        |
| Q15_11_x9       | Duloxetine prescribed for quitting smoking                                  | Yes .....1        |
| Q15_12_x9       | Duloxetine prescribed for sleep problems (e.g. insomnia)                    | Yes .....1        |
| Q15_13_x9       | Duloxetine prescribed for restless legs syndrome                            | Yes .....1        |
| Q15_14_x9       | Duloxetine prescribed for premature ejaculation (MEN ONLY)                  | Yes .....1        |
| Q15_15_x9       | Duloxetine prescribed for attention-deficit/hyperactivity disorder          | Yes .....1        |
| Q15_16_x9       | Duloxetine prescribed for other reason                                      | Yes .....1        |
| Q15_16_TEXT_x9  | Other reason Duloxetine was prescribed                                      | _____             |
| Q15_17_x9       | Participant unsure why Duloxetine was prescribed                            | Yes .....1        |
| Q15_1_x10       | Paroxetine prescribed for depression                                        | Yes .....1        |
| Q15_2_x10       | Paroxetine prescribed for bipolar disorder                                  | Yes .....1        |
| Q15_3_x10       | Paroxetine prescribed for anxiety                                           | Yes .....1        |
| Q15_4_x10       | Paroxetine prescribed for panic disorder                                    | Yes .....1        |
| Q15_5_x10       | Paroxetine prescribed for obsessive compulsive disorder                     | Yes .....1        |
| Q15_6_x10       | Paroxetine prescribed for specific phobia                                   | Yes .....1        |
| Q15_7_x10       | Paroxetine prescribed for posttraumatic stress disorder                     | Yes .....1        |
| Q15_8_x10       | Paroxetine prescribed for premenstrual dysphoric mood disorder (WOMEN ONLY) | Yes .....1        |
| Q15_9_x10       | Paroxetine prescribed for menopausal symptoms (WOMEN ONLY)                  | Yes .....1        |
| Q15_10_x10      | Paroxetine prescribed for chronic pain                                      | Yes .....1        |
| Q15_11_x10      | Paroxetine prescribed for quitting smoking                                  | Yes .....1        |
| Q15_12_x10      | Paroxetine prescribed for sleep problems (e.g. insomnia)                    | Yes .....1        |
| Q15_13_x10      | Paroxetine prescribed for restless legs syndrome                            | Yes .....1        |
| Q15_14_x10      | Paroxetine prescribed for premature ejaculation (MEN ONLY)                  | Yes .....1        |
| Q15_15_x10      | Paroxetine prescribed for attention-deficit/hyperactivity disorder          | Yes .....1        |
| Q15_16_x10      | Paroxetine prescribed for other reason                                      | Yes .....1        |
| Q15_16_TEXT_x10 | Other reason Paroxetine was prescribed                                      | _____             |
| Q15_17_x10      | Participant unsure why Paroxetine was prescribed                            | Yes .....1        |
| <hr/>           |                                                                             |                   |
| Q16             | How old were you when you started taking [X FROM Q10]?                      |                   |
| Q16_x1n         | Age started taking Sertraline                                               | ___/___/___ YEARS |
| Q16_x2n         | Age started taking Escitalopram                                             | ___/___/___ YEARS |
| Q16_x3n         | Age started taking Venlafaxine                                              | ___/___/___ YEARS |
| Q16_x4n         | Age started taking Amitriptyline                                            | ___/___/___ YEARS |
| Q16_x5n         | Age started taking Mirtazapine                                              | ___/___/___ YEARS |
| Q16_x6n         | Age started taking Desvenlafaxine                                           | ___/___/___ YEARS |
| Q16_x7n         | Age started taking Citalopram                                               | ___/___/___ YEARS |
| Q16_x8n         | Age started taking Fluoxetine                                               | ___/___/___ YEARS |
| Q16_x9n         | Age started taking Duloxetine                                               | ___/___/___ YEARS |
| Q16_x10n        | Age started taking Paroxetine                                               | ___/___/___ YEARS |

|        |                                                                   |                                                                                                                                                                                                |
|--------|-------------------------------------------------------------------|------------------------------------------------------------------------------------------------------------------------------------------------------------------------------------------------|
| Q17    | For how long did you take / have you been taking<br>[X FROM Q10]? |                                                                                                                                                                                                |
| Q17_x1 | Time taking Sertraline                                            | 1 - 3 months .....1<br>4 - 6 months .....2<br>7 - 12 months .....3<br>Between 1 and 2 years .....4<br>Between 2 and 3 years .....5<br>Between 3 and 4 years .....6<br>More than 4 years .....7 |
| Q17_x2 | Time taking Escitalopram                                          | 1 - 3 months .....1<br>4 - 6 months .....2<br>7 - 12 months .....3<br>Between 1 and 2 years .....4<br>Between 2 and 3 years .....5<br>Between 3 and 4 years .....6<br>More than 4 years .....7 |
| Q17_x3 | Time taking Venlafaxine                                           | 1 - 3 months .....1<br>4 - 6 months .....2<br>7 - 12 months .....3<br>Between 1 and 2 years .....4<br>Between 2 and 3 years .....5<br>Between 3 and 4 years .....6<br>More than 4 years .....7 |
| Q17_x4 | Time taking Amitriptyline                                         | 1 - 3 months .....1<br>4 - 6 months .....2<br>7 - 12 months .....3<br>Between 1 and 2 years .....4<br>Between 2 and 3 years .....5<br>Between 3 and 4 years .....6<br>More than 4 years .....7 |
| Q17_x5 | Time taking Mirtazapine                                           | 1 - 3 months .....1<br>4 - 6 months .....2<br>7 - 12 months .....3<br>Between 1 and 2 years .....4<br>Between 2 and 3 years .....5<br>Between 3 and 4 years .....6<br>More than 4 years .....7 |
| Q17_x6 | Time taking Desvenlafaxine                                        | 1 - 3 months .....1<br>4 - 6 months .....2<br>7 - 12 months .....3<br>Between 1 and 2 years .....4<br>Between 2 and 3 years .....5<br>Between 3 and 4 years .....6<br>More than 4 years .....7 |
| Q17_x7 | Time taking Citalopram                                            | 1 - 3 months .....1<br>4 - 6 months .....2<br>7 - 12 months .....3<br>Between 1 and 2 years .....4<br>Between 2 and 3 years .....5<br>Between 3 and 4 years .....6<br>More than 4 years .....7 |
| Q17_x8 | Time taking Fluoxetine                                            | 1 - 3 months .....1<br>4 - 6 months .....2<br>7 - 12 months .....3<br>Between 1 and 2 years .....4                                                                                             |

|         |                        |                              |
|---------|------------------------|------------------------------|
|         |                        | Between 2 and 3 years .....5 |
|         |                        | Between 3 and 4 years .....6 |
|         |                        | More than 4 years .....7     |
| Q17_x9  | Time taking Duloxetine | 1 - 3 months .....1          |
|         |                        | 4 - 6 months .....2          |
|         |                        | 7 - 12 months .....3         |
|         |                        | Between 1 and 2 years .....4 |
|         |                        | Between 2 and 3 years .....5 |
|         |                        | Between 3 and 4 years .....6 |
|         |                        | More than 4 years .....7     |
| Q17_x10 | Time taking Paroxetine | 1 - 3 months .....1          |
|         |                        | 4 - 6 months .....2          |
|         |                        | 7 - 12 months .....3         |
|         |                        | Between 1 and 2 years .....4 |
|         |                        | Between 2 and 3 years .....5 |
|         |                        | Between 3 and 4 years .....6 |
|         |                        | More than 4 years .....7     |

---

|          |                                                                    |                                                                                           |
|----------|--------------------------------------------------------------------|-------------------------------------------------------------------------------------------|
| Q18      | How well does / did each antidepressant [X FROM Q10] work for you? |                                                                                           |
| Q18_xx1  | How well Sertraline works                                          | Not at all well .....1<br>Moderately well .....2<br>Very well .....3<br>Don't know .....4 |
| Q18_xx2  | How well Escitalopram works                                        | Not at all well .....1<br>Moderately well .....2<br>Very well .....3<br>Don't know .....4 |
| Q18_xx3  | How well Venlafaxine works                                         | Not at all well .....1<br>Moderately well .....2<br>Very well .....3<br>Don't know .....4 |
| Q18_xx4  | How well Amitriptyline works                                       | Not at all well .....1<br>Moderately well .....2<br>Very well .....3<br>Don't know .....4 |
| Q18_x5   | How well Mirtazapine works                                         | Not at all well .....1<br>Moderately well .....2<br>Very well .....3<br>Don't know .....4 |
| Q18_xx6  | How well Desvenlafaxine works                                      | Not at all well .....1<br>Moderately well .....2<br>Very well .....3<br>Don't know .....4 |
| Q18_xx7  | How well Citalopram works                                          | Not at all well .....1<br>Moderately well .....2<br>Very well .....3<br>Don't know .....4 |
| Q18_xx8  | How well Fluoxetine works                                          | Not at all well .....1<br>Moderately well .....2<br>Very well .....3<br>Don't know .....4 |
| Q18_xx9  | How well Duloxetine works                                          | Not at all well .....1<br>Moderately well .....2<br>Very well .....3<br>Don't know .....4 |
| Q18_xx10 | How well Paroxetine works                                          | Not at all well .....1<br>Moderately well .....2<br>Very well .....3<br>Don't know .....4 |

---

Q19 NOT USED FOR PARTICIPANT INPUT

---

|        |                                                                                                                                                                           |                         |
|--------|---------------------------------------------------------------------------------------------------------------------------------------------------------------------------|-------------------------|
| Q20    | After taking [X FROM Q10] for a period of time, did you ever experience any further symptoms associated with the condition for which you were prescribed antidepressants? |                         |
| Q20_1  | Further symptoms after taking Sertraline                                                                                                                                  | No .....1<br>Yes .....2 |
| Q20_2  | Further symptoms after taking Escitalopram                                                                                                                                | No .....1<br>Yes .....2 |
| Q20_3  | Further symptoms after taking Venlafaxine                                                                                                                                 | No .....1<br>Yes .....2 |
| Q20_4  | Further symptoms after taking Amitriptyline                                                                                                                               | No .....1<br>Yes .....2 |
| Q20_5  | Further symptoms after taking Mirtazapine                                                                                                                                 | No .....1<br>Yes .....2 |
| Q20_6  | Further symptoms after taking Desvenlafaxine                                                                                                                              | No .....1<br>Yes .....2 |
| Q20_7  | Further symptoms after taking Citalopram                                                                                                                                  | No .....1<br>Yes .....2 |
| Q20_8  | Further symptoms after taking Fluoxetine                                                                                                                                  | No .....1<br>Yes .....2 |
| Q20_9  | Further symptoms after taking Duloxetine                                                                                                                                  | No .....1<br>Yes .....2 |
| Q20_10 | Further symptoms after taking Paroxetine                                                                                                                                  | No .....1<br>Yes .....2 |

---



|       |                                                                                              |                                                                                                                                                                                                       |
|-------|----------------------------------------------------------------------------------------------|-------------------------------------------------------------------------------------------------------------------------------------------------------------------------------------------------------|
| Q21   | How long did the improvement in symptoms you experienced after taking [X FROM Q10] last for? |                                                                                                                                                                                                       |
| Q21_1 | Duration of improvement from Sertraline                                                      | Less than a month .....<br>1 to 2 months .....2<br>3 to 6 months .....3<br>7 to 12 months .....4<br>More than 12 months .....5<br>Not sure .....6<br>I didn't have any improvement in symptoms .....7 |
| Q21_2 | Duration of improvement from Escitalopram                                                    | Less than a month .....<br>1 to 2 months .....2<br>3 to 6 months .....3<br>7 to 12 months .....4<br>More than 12 months .....5<br>Not sure .....6<br>I didn't have any improvement in symptoms .....7 |
| Q21_3 | Duration of improvement from Venlafaxine                                                     | Less than a month .....<br>1 to 2 months .....2<br>3 to 6 months .....3<br>7 to 12 months .....4<br>More than 12 months .....5<br>Not sure .....6<br>I didn't have any improvement in symptoms .....7 |
| Q21_4 | Duration of improvement from Amitriptyline                                                   | Less than a month .....<br>1 to 2 months .....2<br>3 to 6 months .....3<br>7 to 12 months .....4<br>More than 12 months .....5<br>Not sure .....6<br>I didn't have any improvement in symptoms .....7 |
| Q21_5 | Duration of improvement from Mirtazapine                                                     | Less than a month .....<br>1 to 2 months .....2<br>3 to 6 months .....3<br>7 to 12 months .....4<br>More than 12 months .....5<br>Not sure .....6<br>I didn't have any improvement in symptoms .....7 |
| Q21_6 | Duration of improvement from Desvenlafaxine                                                  | Less than a month .....<br>1 to 2 months .....2<br>3 to 6 months .....3<br>7 to 12 months .....4<br>More than 12 months .....5<br>Not sure .....6<br>I didn't have any improvement in symptoms .....7 |
| Q21_7 | Duration of improvement from Citalopram                                                      | Less than a month .....<br>1 to 2 months .....2<br>3 to 6 months .....3<br>7 to 12 months .....4<br>More than 12 months .....5<br>Not sure .....6                                                     |

|        |                                         |                                                                                                                                                                                                       |
|--------|-----------------------------------------|-------------------------------------------------------------------------------------------------------------------------------------------------------------------------------------------------------|
|        |                                         | I didn't have any improvement in symptoms .....7                                                                                                                                                      |
| Q21_8  | Duration of improvement from Fluoxetine | Less than a month .....<br>1 to 2 months .....2<br>3 to 6 months .....3<br>7 to 12 months .....4<br>More than 12 months .....5<br>Not sure .....6<br>I didn't have any improvement in symptoms .....7 |
| Q21_9  | Duration of improvement from Duloxetine | Less than a month .....<br>1 to 2 months .....2<br>3 to 6 months .....3<br>7 to 12 months .....4<br>More than 12 months .....5<br>Not sure .....6<br>I didn't have any improvement in symptoms .....7 |
| Q21_10 | Duration of improvement from Paroxetine | Less than a month .....<br>1 to 2 months .....2<br>3 to 6 months .....3<br>7 to 12 months .....4<br>More than 12 months .....5<br>Not sure .....6<br>I didn't have any improvement in symptoms .....7 |

---

Q22\_1 Overall, how would you rate the benefits of taking \_\_\_\_\_ STARS  
antidepressants?  
(Lowest / worst rating = 1 star, highest / best rating =5 stars)

---

Q23 What were the best aspects of taking the antidepressant(s)? *Include any antidepressant you have taken* .  
Please select all that apply.

|       |                                                                                   |            |
|-------|-----------------------------------------------------------------------------------|------------|
| Q23_1 | Relief of depressive symptoms (low mood, sadness, loss of pleasure in life)       | Yes .....1 |
| Q23_2 | Relief of other key symptoms (e.g. sleep disturbance, anxiety, loss of sex drive) | Yes .....1 |
| Q23_3 | Reduction in suicidal thinking or actions                                         | Yes .....1 |
| Q23_4 | Return of normal emotions                                                         | Yes .....1 |
| Q23_5 | Improved relationships with those I am close to                                   | Yes .....1 |
| Q23_6 | Getting back to normal daily activities                                           | Yes .....1 |
| Q23_7 | Restored control over my mood and actions                                         | Yes .....1 |
| Q23_8 | Other benefit                                                                     | Yes .....1 |

Q23\_8\_TEXT Specified other benefit of antidepressant(s) \_\_\_\_\_

---

Q24 Did you experience side effects from any antidepressant? No .....1  
Yes .....2

\*\*\*\*\*  
IF NO SIDE EFFECTS (Q24 = 1), GO TO Q29  
IF SIDE EFFECTS (Q24 = 2) BUT NO ANTIDEPRESSANT SELECTED AT Q10  
(NONE OF Q10\_1 TO Q10\_10 = 1), GO TO Q27  
ELSE CONTINUE  
\*\*\*\*\*

---

\*\*\*\*\*  
FOR EACH ANTIDEPRESSANT SELECTED AT Q10  
(ANY OF Q10\_1 TO Q10\_10 = 1), COMPLETE Q25  
\*\*\*\*\*

|          |                                                                                                           |            |
|----------|-----------------------------------------------------------------------------------------------------------|------------|
| Q25      | Which side effects did you experience from the following antidepressant(s)? Please select all that apply. |            |
| Q25_1_1  | Dry mouth from Sertraline                                                                                 | Yes .....1 |
| Q25_1_2  | Dry mouth from Escitalopram                                                                               | Yes .....1 |
| Q25_1_3  | Dry mouth from Venlafaxine                                                                                | Yes .....1 |
| Q25_1_4  | Dry mouth from Amitriptyline                                                                              | Yes .....1 |
| Q25_1_5  | Dry mouth from Mirtazapine                                                                                | Yes .....1 |
| Q25_1_6  | Dry mouth from Desvenlafaxine                                                                             | Yes .....1 |
| Q25_1_7  | Dry mouth from Citalopram                                                                                 | Yes .....1 |
| Q25_1_8  | Dry mouth from Fluoxetine                                                                                 | Yes .....1 |
| Q25_1_9  | Dry mouth from Duloxetine                                                                                 | Yes .....1 |
| Q25_1_10 | Dry mouth from Paroxetine                                                                                 | Yes .....1 |
| Q25_2_1  | Sweating from Sertraline                                                                                  | Yes .....1 |
| Q25_2_2  | Sweating from Escitalopram                                                                                | Yes .....1 |
| Q25_2_3  | Sweating from Venlafaxine                                                                                 | Yes .....1 |
| Q25_2_4  | Sweating from Amitriptyline                                                                               | Yes .....1 |
| Q25_2_5  | Sweating from Mirtazapine                                                                                 | Yes .....1 |
| Q25_2_6  | Sweating from Desvenlafaxine                                                                              | Yes .....1 |
| Q25_2_7  | Sweating from Citalopram                                                                                  | Yes .....1 |
| Q25_2_8  | Sweating from Fluoxetine                                                                                  | Yes .....1 |
| Q25_2_9  | Sweating from Duloxetine                                                                                  | Yes .....1 |
| Q25_2_10 | Sweating from Paroxetine                                                                                  | Yes .....1 |
| Q25_3_1  | Nausea from Sertraline                                                                                    | Yes .....1 |
| Q25_3_2  | Nausea from Escitalopram                                                                                  | Yes .....1 |
| Q25_3_3  | Nausea from Venlafaxine                                                                                   | Yes .....1 |
| Q25_3_4  | Nausea from Amitriptyline                                                                                 | Yes .....1 |
| Q25_3_5  | Nausea from Mirtazapine                                                                                   | Yes .....1 |
| Q25_3_6  | Nausea from Desvenlafaxine                                                                                | Yes .....1 |
| Q25_3_7  | Nausea from Citalopram                                                                                    | Yes .....1 |
| Q25_3_8  | Nausea from Fluoxetine                                                                                    | Yes .....1 |
| Q25_3_9  | Nausea from Duloxetine                                                                                    | Yes .....1 |
| Q25_3_10 | Nausea from Paroxetine                                                                                    | Yes .....1 |
| Q25_4_1  | Vomiting from Sertraline                                                                                  | Yes .....1 |
| Q25_4_2  | Vomiting from Escitalopram                                                                                | Yes .....1 |
| Q25_4_3  | Vomiting from Venlafaxine                                                                                 | Yes .....1 |
| Q25_4_4  | Vomiting from Amitriptyline                                                                               | Yes .....1 |
| Q25_4_5  | Vomiting from Mirtazapine                                                                                 | Yes .....1 |
| Q25_4_6  | Vomiting from Desvenlafaxine                                                                              | Yes .....1 |
| Q25_4_7  | Vomiting from Citalopram                                                                                  | Yes .....1 |
| Q25_4_8  | Vomiting from Fluoxetine                                                                                  | Yes .....1 |
| Q25_4_9  | Vomiting from Duloxetine                                                                                  | Yes .....1 |
| Q25_4_10 | Vomiting from Paroxetine                                                                                  | Yes .....1 |
| Q25_5_1  | Diarrhoea from Sertraline                                                                                 | Yes .....1 |
| Q25_5_2  | Diarrhoea from Escitalopram                                                                               | Yes .....1 |
| Q25_5_3  | Diarrhoea from Venlafaxine                                                                                | Yes .....1 |
| Q25_5_4  | Diarrhoea from Amitriptyline                                                                              | Yes .....1 |
| Q25_5_5  | Diarrhoea from Mirtazapine                                                                                | Yes .....1 |
| Q25_5_6  | Diarrhoea from Desvenlafaxine                                                                             | Yes .....1 |
| Q25_5_7  | Diarrhoea from Citalopram                                                                                 | Yes .....1 |
| Q25_5_8  | Diarrhoea from Fluoxetine                                                                                 | Yes .....1 |
| Q25_5_9  | Diarrhoea from Duloxetine                                                                                 | Yes .....1 |
| Q25_5_10 | Diarrhoea from Paroxetine                                                                                 | Yes .....1 |
| Q25_6_1  | Constipation from Sertraline                                                                              | Yes .....1 |
| Q25_6_2  | Constipation from Escitalopram                                                                            | Yes .....1 |
| Q25_6_3  | Constipation from Venlafaxine                                                                             | Yes .....1 |
| Q25_6_4  | Constipation from Amitriptyline                                                                           | Yes .....1 |
| Q25_6_5  | Constipation from Mirtazapine                                                                             | Yes .....1 |

|           |                                               |            |
|-----------|-----------------------------------------------|------------|
| Q25_6_6   | Constipation from Desvenlafaxine              | Yes .....1 |
| Q25_6_7   | Constipation from Citalopram                  | Yes .....1 |
| Q25_6_8   | Constipation from Fluoxetine                  | Yes .....1 |
| Q25_6_9   | Constipation from Duloxetine                  | Yes .....1 |
| Q25_6_10  | Constipation from Paroxetine                  | Yes .....1 |
| Q25_7_1   | Headache from Sertraline                      | Yes .....1 |
| Q25_7_2   | Headache from Escitalopram                    | Yes .....1 |
| Q25_7_3   | Headache from Venlafaxine                     | Yes .....1 |
| Q25_7_4   | Headache from Amitriptyline                   | Yes .....1 |
| Q25_7_5   | Headache from Mirtazapine                     | Yes .....1 |
| Q25_7_6   | Headache from Desvenlafaxine                  | Yes .....1 |
| Q25_7_7   | Headache from Citalopram                      | Yes .....1 |
| Q25_7_8   | Headache from Fluoxetine                      | Yes .....1 |
| Q25_7_9   | Headache from Duloxetine                      | Yes .....1 |
| Q25_7_10  | Headache from Paroxetine                      | Yes .....1 |
| Q25_8_1   | Dizziness from Sertraline                     | Yes .....1 |
| Q25_8_2   | Dizziness from Escitalopram                   | Yes .....1 |
| Q25_8_3   | Dizziness from Venlafaxine                    | Yes .....1 |
| Q25_8_4   | Dizziness from Amitriptyline                  | Yes .....1 |
| Q25_8_5   | Dizziness from Mirtazapine                    | Yes .....1 |
| Q25_8_6   | Dizziness from Desvenlafaxine                 | Yes .....1 |
| Q25_8_7   | Dizziness from Citalopram                     | Yes .....1 |
| Q25_8_8   | Dizziness from Fluoxetine                     | Yes .....1 |
| Q25_8_9   | Dizziness from Duloxetine                     | Yes .....1 |
| Q25_8_10  | Dizziness from Paroxetine                     | Yes .....1 |
| Q25_9_1   | Shaking from Sertraline                       | Yes .....1 |
| Q25_9_2   | Shaking from Escitalopram                     | Yes .....1 |
| Q25_9_3   | Shaking from Venlafaxine                      | Yes .....1 |
| Q25_9_4   | Shaking from Amitriptyline                    | Yes .....1 |
| Q25_9_5   | Shaking from Mirtazapine                      | Yes .....1 |
| Q25_9_6   | Shaking from Desvenlafaxine                   | Yes .....1 |
| Q25_9_7   | Shaking from Citalopram                       | Yes .....1 |
| Q25_9_8   | Shaking from Fluoxetine                       | Yes .....1 |
| Q25_9_9   | Shaking from Duloxetine                       | Yes .....1 |
| Q25_9_10  | Shaking from Paroxetine                       | Yes .....1 |
| Q25_10_1  | Muscle pain from Sertraline                   | Yes .....1 |
| Q25_10_2  | Muscle pain from Escitalopram                 | Yes .....1 |
| Q25_10_3  | Muscle pain from Venlafaxine                  | Yes .....1 |
| Q25_10_4  | Muscle pain from Amitriptyline                | Yes .....1 |
| Q25_10_5  | Muscle pain from Mirtazapine                  | Yes .....1 |
| Q25_10_6  | Muscle pain from Desvenlafaxine               | Yes .....1 |
| Q25_10_7  | Muscle pain from Citalopram                   | Yes .....1 |
| Q25_10_8  | Muscle pain from Fluoxetine                   | Yes .....1 |
| Q25_10_9  | Muscle pain from Duloxetine                   | Yes .....1 |
| Q25_10_10 | Muscle pain from Paroxetine                   | Yes .....1 |
| Q25_11_1  | Drowsiness from Sertraline                    | Yes .....1 |
| Q25_11_2  | Drowsiness from Escitalopram                  | Yes .....1 |
| Q25_11_3  | Drowsiness from Venlafaxine                   | Yes .....1 |
| Q25_11_4  | Drowsiness from Amitriptyline                 | Yes .....1 |
| Q25_11_5  | Drowsiness from Mirtazapine                   | Yes .....1 |
| Q25_11_6  | Drowsiness from Desvenlafaxine                | Yes .....1 |
| Q25_11_7  | Drowsiness from Citalopram                    | Yes .....1 |
| Q25_11_8  | Drowsiness from Fluoxetine                    | Yes .....1 |
| Q25_11_9  | Drowsiness from Duloxetine                    | Yes .....1 |
| Q25_11_10 | Drowsiness from Paroxetine                    | Yes .....1 |
| Q25_12_1  | Difficulty getting to sleep from Sertraline   | Yes .....1 |
| Q25_12_2  | Difficulty getting to sleep from Escitalopram | Yes .....1 |

|           |                                                 |            |
|-----------|-------------------------------------------------|------------|
| Q25_12_3  | Difficulty getting to sleep from Venlafaxine    | Yes .....1 |
| Q25_12_4  | Difficulty getting to sleep from Amitriptyline  | Yes .....1 |
| Q25_12_5  | Difficulty getting to sleep from Mirtazapine    | Yes .....1 |
| Q25_12_6  | Difficulty getting to sleep from Desvenlafaxine | Yes .....1 |
| Q25_12_7  | Difficulty getting to sleep from Citalopram     | Yes .....1 |
| Q25_12_8  | Difficulty getting to sleep from Fluoxetine     | Yes .....1 |
| Q25_12_9  | Difficulty getting to sleep from Duloxetine     | Yes .....1 |
| Q25_12_10 | Difficulty getting to sleep from Paroxetine     | Yes .....1 |
| Q25_13_1  | Increased anxiety from Sertraline               | Yes .....1 |
| Q25_13_2  | Increased anxiety from Escitalopram             | Yes .....1 |
| Q25_13_3  | Increased anxiety from Venlafaxine              | Yes .....1 |
| Q25_13_4  | Increased anxiety from Amitriptyline            | Yes .....1 |
| Q25_13_5  | Increased anxiety from Mirtazapine              | Yes .....1 |
| Q25_13_6  | Increased anxiety from Desvenlafaxine           | Yes .....1 |
| Q25_13_7  | Increased anxiety from Citalopram               | Yes .....1 |
| Q25_13_8  | Increased anxiety from Fluoxetine               | Yes .....1 |
| Q25_13_9  | Increased anxiety from Duloxetine               | Yes .....1 |
| Q25_13_10 | Increased anxiety from Paroxetine               | Yes .....1 |
| Q25_14_1  | Agitation from Sertraline                       | Yes .....1 |
| Q25_14_2  | Agitation from Escitalopram                     | Yes .....1 |
| Q25_14_3  | Agitation from Venlafaxine                      | Yes .....1 |
| Q25_14_4  | Agitation from Amitriptyline                    | Yes .....1 |
| Q25_14_5  | Agitation from Mirtazapine                      | Yes .....1 |
| Q25_14_6  | Agitation from Desvenlafaxine                   | Yes .....1 |
| Q25_14_7  | Agitation from Citalopram                       | Yes .....1 |
| Q25_14_8  | Agitation from Fluoxetine                       | Yes .....1 |
| Q25_14_9  | Agitation from Duloxetine                       | Yes .....1 |
| Q25_14_10 | Agitation from Paroxetine                       | Yes .....1 |
| Q25_15_1  | Fatigue or weakness from Sertraline             | Yes .....1 |
| Q25_15_2  | Fatigue or weakness from Escitalopram           | Yes .....1 |
| Q25_15_3  | Fatigue or weakness from Venlafaxine            | Yes .....1 |
| Q25_15_4  | Fatigue or weakness from Amitriptyline          | Yes .....1 |
| Q25_15_5  | Fatigue or weakness from Mirtazapine            | Yes .....1 |
| Q25_15_6  | Fatigue or weakness from Desvenlafaxine         | Yes .....1 |
| Q25_15_7  | Fatigue or weakness from Citalopram             | Yes .....1 |
| Q25_15_8  | Fatigue or weakness from Fluoxetine             | Yes .....1 |
| Q25_15_9  | Fatigue or weakness from Duloxetine             | Yes .....1 |
| Q25_15_10 | Fatigue or weakness from Paroxetine             | Yes .....1 |
| Q25_16_1  | Weight gain from Sertraline                     | Yes .....1 |
| Q25_16_2  | Weight gain from Escitalopram                   | Yes .....1 |
| Q25_16_3  | Weight gain from Venlafaxine                    | Yes .....1 |
| Q25_16_4  | Weight gain from Amitriptyline                  | Yes .....1 |
| Q25_16_5  | Weight gain from Mirtazapine                    | Yes .....1 |
| Q25_16_6  | Weight gain from Desvenlafaxine                 | Yes .....1 |
| Q25_16_7  | Weight gain from Citalopram                     | Yes .....1 |
| Q25_16_8  | Weight gain from Fluoxetine                     | Yes .....1 |
| Q25_16_9  | Weight gain from Duloxetine                     | Yes .....1 |
| Q25_16_10 | Weight gain from Paroxetine                     | Yes .....1 |
| Q25_17_1  | Weight loss from Sertraline                     | Yes .....1 |
| Q25_17_2  | Weight loss from Escitalopram                   | Yes .....1 |
| Q25_17_3  | Weight loss from Venlafaxine                    | Yes .....1 |
| Q25_17_4  | Weight loss from Amitriptyline                  | Yes .....1 |
| Q25_17_5  | Weight loss from Mirtazapine                    | Yes .....1 |
| Q25_17_6  | Weight loss from Desvenlafaxine                 | Yes .....1 |
| Q25_17_7  | Weight loss from Citalopram                     | Yes .....1 |
| Q25_17_8  | Weight loss from Fluoxetine                     | Yes .....1 |
| Q25_17_9  | Weight loss from Duloxetine                     | Yes .....1 |
| Q25_17_10 | Weight loss from Paroxetine                     | Yes .....1 |

|           |                                                      |     |        |
|-----------|------------------------------------------------------|-----|--------|
| Q25_18_1  | Rash from Sertraline                                 | Yes | .....1 |
| Q25_18_2  | Rash from Escitalopram                               | Yes | .....1 |
| Q25_18_3  | Rash from Venlafaxine                                | Yes | .....1 |
| Q25_18_4  | Rash from Amitriptyline                              | Yes | .....1 |
| Q25_18_5  | Rash from Mirtazapine                                | Yes | .....1 |
| Q25_18_6  | Rash from Desvenlafaxine                             | Yes | .....1 |
| Q25_18_7  | Rash from Citalopram                                 | Yes | .....1 |
| Q25_18_8  | Rash from Fluoxetine                                 | Yes | .....1 |
| Q25_18_9  | Rash from Duloxetine                                 | Yes | .....1 |
| Q25_18_10 | Rash from Paroxetine                                 | Yes | .....1 |
| Q25_19_1  | Runny nose from Sertraline                           | Yes | .....1 |
| Q25_19_2  | Runny nose from Escitalopram                         | Yes | .....1 |
| Q25_19_3  | Runny nose from Venlafaxine                          | Yes | .....1 |
| Q25_19_4  | Runny nose from Amitriptyline                        | Yes | .....1 |
| Q25_19_5  | Runny nose from Mirtazapine                          | Yes | .....1 |
| Q25_19_6  | Runny nose from Desvenlafaxine                       | Yes | .....1 |
| Q25_19_7  | Runny nose from Citalopram                           | Yes | .....1 |
| Q25_19_8  | Runny nose from Fluoxetine                           | Yes | .....1 |
| Q25_19_9  | Runny nose from Duloxetine                           | Yes | .....1 |
| Q25_19_10 | Runny nose from Paroxetine                           | Yes | .....1 |
| Q25_20_1  | Reduced sexual desire / function from Sertraline     | Yes | .....1 |
| Q25_20_2  | Reduced sexual desire / function from Escitalopram   | Yes | .....1 |
| Q25_20_3  | Reduced sexual desire / function from Venlafaxine    | Yes | .....1 |
| Q25_20_4  | Reduced sexual desire / function from Amitriptyline  | Yes | .....1 |
| Q25_20_5  | Reduced sexual desire / function from Mirtazapine    | Yes | .....1 |
| Q25_20_6  | Reduced sexual desire / function from Desvenlafaxine | Yes | .....1 |
| Q25_20_7  | Reduced sexual desire / function from Citalopram     | Yes | .....1 |
| Q25_20_8  | Reduced sexual desire / function from Fluoxetine     | Yes | .....1 |
| Q25_20_9  | Reduced sexual desire / function from Duloxetine     | Yes | .....1 |
| Q25_20_10 | Reduced sexual desire / function from Paroxetine     | Yes | .....1 |
| Q25_21_1  | Blurred vision from Sertraline                       | Yes | .....1 |
| Q25_21_2  | Blurred vision from Escitalopram                     | Yes | .....1 |
| Q25_21_3  | Blurred vision from Venlafaxine                      | Yes | .....1 |
| Q25_21_4  | Blurred vision from Amitriptyline                    | Yes | .....1 |
| Q25_21_5  | Blurred vision from Mirtazapine                      | Yes | .....1 |
| Q25_21_6  | Blurred vision from Desvenlafaxine                   | Yes | .....1 |
| Q25_21_7  | Blurred vision from Citalopram                       | Yes | .....1 |
| Q25_21_8  | Blurred vision from Fluoxetine                       | Yes | .....1 |
| Q25_21_9  | Blurred vision from Duloxetine                       | Yes | .....1 |
| Q25_21_10 | Blurred vision from Paroxetine                       | Yes | .....1 |
| Q25_22_1  | Suicidal thoughts from Sertraline                    | Yes | .....1 |
| Q25_22_2  | Suicidal thoughts from Escitalopram                  | Yes | .....1 |
| Q25_22_3  | Suicidal thoughts from Venlafaxine                   | Yes | .....1 |
| Q25_22_4  | Suicidal thoughts from Amitriptyline                 | Yes | .....1 |
| Q25_22_5  | Suicidal thoughts from Mirtazapine                   | Yes | .....1 |
| Q25_22_6  | Suicidal thoughts from Desvenlafaxine                | Yes | .....1 |
| Q25_22_7  | Suicidal thoughts from Citalopram                    | Yes | .....1 |
| Q25_22_8  | Suicidal thoughts from Fluoxetine                    | Yes | .....1 |
| Q25_22_9  | Suicidal thoughts from Duloxetine                    | Yes | .....1 |
| Q25_22_10 | Suicidal thoughts from Paroxetine                    | Yes | .....1 |
| Q25_23_1  | Attempted suicide from Sertraline                    | Yes | .....1 |
| Q25_23_2  | Attempted suicide from Escitalopram                  | Yes | .....1 |
| Q25_23_3  | Attempted suicide from Venlafaxine                   | Yes | .....1 |
| Q25_23_4  | Attempted suicide from Amitriptyline                 | Yes | .....1 |
| Q25_23_5  | Attempted suicide from Mirtazapine                   | Yes | .....1 |
| Q25_23_6  | Attempted suicide from Desvenlafaxine                | Yes | .....1 |
| Q25_23_7  | Attempted suicide from Citalopram                    | Yes | .....1 |

|           |                                       |           |   |
|-----------|---------------------------------------|-----------|---|
| Q25_23_8  | Attempted suicide from Fluoxetine     | Yes ..... | 1 |
| Q25_23_9  | Attempted suicide from Duloxetine     | Yes ..... | 1 |
| Q25_23_10 | Attempted suicide from Paroxetine     | Yes ..... | 1 |
| Q25_24_1  | Other side effect from Sertraline     | Yes ..... | 1 |
| Q25_24_2  | Other side effect from Escitalopram   | Yes ..... | 1 |
| Q25_24_3  | Other side effect from Venlafaxine    | Yes ..... | 1 |
| Q25_24_4  | Other side effect from Amitriptyline  | Yes ..... | 1 |
| Q25_24_5  | Other side effect from Mirtazapine    | Yes ..... | 1 |
| Q25_24_6  | Other side effect from Desvenlafaxine | Yes ..... | 1 |
| Q25_24_7  | Other side effect from Citalopram     | Yes ..... | 1 |
| Q25_24_8  | Other side effect from Fluoxetine     | Yes ..... | 1 |
| Q25_24_9  | Other side effect from Duloxetine     | Yes ..... | 1 |
| Q25_24_10 | Other side effect from Paroxetine     | Yes ..... | 1 |
| Q25_25_1  | No side effects from Sertraline       | Yes ..... | 1 |
| Q25_25_2  | No side effects from Escitalopram     | Yes ..... | 1 |
| Q25_25_3  | No side effects from Venlafaxine      | Yes ..... | 1 |
| Q25_25_4  | No side effects from Amitriptyline    | Yes ..... | 1 |
| Q25_25_5  | No side effects from Mirtazapine      | Yes ..... | 1 |
| Q25_25_6  | No side effects from Desvenlafaxine   | Yes ..... | 1 |
| Q25_25_7  | No side effects from Citalopram       | Yes ..... | 1 |
| Q25_25_8  | No side effects from Fluoxetine       | Yes ..... | 1 |
| Q25_25_9  | No side effects from Duloxetine       | Yes ..... | 1 |
| Q25_25_10 | No side effects from Paroxetine       | Yes ..... | 1 |

\*\*\*\*\*  
 FOR EACH ANTIDEPRESSANT WITH NOMINATED SIDE-EFFECTS  
 (ANY OF Q25\_1\_1 TO Q25\_124\_10 = 1), COMPLETE Q26  
 \*\*\*\*\*



|            |                                                                                                                                                                                                                                               |                         |
|------------|-----------------------------------------------------------------------------------------------------------------------------------------------------------------------------------------------------------------------------------------------|-------------------------|
| Q26        | Did you have to stop taking any antidepressant because of side effects?                                                                                                                                                                       |                         |
| Q26_1      | Stopped taking Sertraline because of side effects                                                                                                                                                                                             | No .....1<br>Yes .....2 |
| Q26_2      | Stopped taking Escitalopram because of side effects                                                                                                                                                                                           | No .....1<br>Yes .....2 |
| Q26_3      | Stopped taking Venlafaxine because of side effects                                                                                                                                                                                            | No .....1<br>Yes .....2 |
| Q26_4      | Stopped taking Amitriptyline because of side effects                                                                                                                                                                                          | No .....1<br>Yes .....2 |
| Q26_5      | Stopped taking Mirtazapine because of side effects                                                                                                                                                                                            | No .....1<br>Yes .....2 |
| Q26_6      | Stopped taking Desvenlafaxine because of side effects                                                                                                                                                                                         | No .....1<br>Yes .....2 |
| Q26_7      | Stopped taking Citalopram because of side effects                                                                                                                                                                                             | No .....1<br>Yes .....2 |
| Q26_8      | Stopped taking Fluoxetine because of side effects                                                                                                                                                                                             | No .....1<br>Yes .....2 |
| Q26_9      | Stopped taking Duloxetine because of side effects                                                                                                                                                                                             | No .....1<br>Yes .....2 |
| Q26_10     | Stopped taking Paroxetine because of side effects                                                                                                                                                                                             | No .....1<br>Yes .....2 |
| <hr/>      |                                                                                                                                                                                                                                               |                         |
| Q27_1      | Overall, how would you rate the side-effects of taking antidepressants?<br>Lowest / worst rating (for example, very bad side effects) = 1 star, highest / best rating (for example, no side effects or only very mild side effects) = 5 stars | __ STARS                |
| <hr/>      |                                                                                                                                                                                                                                               |                         |
| Q28        | What were the worst aspects of taking the antidepressant(s)? <i>Include any antidepressant you have taken.</i><br>Please select all that apply.                                                                                               |                         |
| Q28_1      | New side-effects like nausea, headache, drowsiness, fatigue, sexual dysfunction                                                                                                                                                               | Yes .....1              |
| Q28_2      | Increased depressive symptoms like anxiety, agitation, sleep disturbance                                                                                                                                                                      | Yes .....1              |
| Q28_3      | Knowing that I needed to take medications to get well                                                                                                                                                                                         | Yes .....1              |
| Q28_4      | Telling others that I needed to take medications                                                                                                                                                                                              | Yes .....1              |
| Q28_5      | Increased suicidal thoughts or actions                                                                                                                                                                                                        | Yes .....1              |
| Q28_6      | Interfered with my capacity to do normal daily activities                                                                                                                                                                                     | Yes .....1              |
| Q28_7      | Increased direct costs (e.g seeing doctors, buying medications)                                                                                                                                                                               | Yes .....1              |
| Q28_8      | Other                                                                                                                                                                                                                                         | Yes .....1              |
| Q28_8_TEXT | Other worst aspect                                                                                                                                                                                                                            | _____                   |
| <hr/>      |                                                                                                                                                                                                                                               |                         |

Q43 The next section asks about experiences you might have had with common mental health problems. Have you ever had a time in your life when you felt depressed (e.g. sad, empty or hopeless) for two weeks or more in a row? No .....1  
Yes .....2

Q44 Have you ever had a time in your life lasting two weeks or more when you lost interest in all or almost all activities (things like hobbies, work, sport, socialising or other activities that you usually enjoyed)? No .....1  
Yes .....2

\*\*\*\*\*  
IF (Q43 = 2 OR Q44 = 2) THEN CONTINUE  
IF (Q43 = 1 AND Q44 = 1) AND EVER BEEN PREGNANT (Q7 = 2) GO TO Q469.  
ELSE GO TO Q70.  
\*\*\*\*\*

Q45 Please think of the period in your life, lasting at least two weeks, when your feelings of depression or loss of interest were worst. How much of the day did these feelings usually last? All day long .....1  
Most of the day .....2  
About half of the day .....3  
Less than half of the day .....4

\*\*\*\*\*  
IF MOST OF THE DAY OR MORE (Q45 = 1 OR 2) THEN CONTINUE.  
IF HALF THE DAY OR LESS (Q45 = 3 OR 4) AND EVER BEEN PREGNANT (Q7 = 2) GO TO Q469.  
ELSE GO TO Q70.  
\*\*\*\*\*

Q46 During this period when your feelings of depression or loss of interest were worst, did you feel this way...? Every day .....1  
Almost every day .....2  
Less often .....3

\*\*\*\*\*  
IF ALMOST EVERY DAY OR MORE (Q46 = 1 OR Q46 = 2) CONTINUE.  
IF LESS OFTEN (Q46 = 3) AND EVER BEEN PREGNANT (Q7 = 2) GO TO Q469.  
ELSE GO TO Q70.  
\*\*\*\*\*

Q47 Did you gain or lose weight without trying, or did you stay about the same? Gained .....1  
Lost .....2  
Both gained and lost weight .....3  
Stayed about the same .....4  
Was on a diet at the time .....5

\*\*\*\*\*  
IF GAINED AND/OR LOST WEIGHT (Q47 = 1, 2 OR 3) THEN CONTINUE  
ELSE GO TO Q49  
\*\*\*\*\*

Q48 About how much did your weight change? Please enter your response in kilograms. \_\_\_/\_\_\_/\_\_\_ KILOGRAMS

Q49 Was your appetite substantially different from your usual appetite nearly every day for at least two weeks during that period of time? No .....1  
Yes .....2

Q50 Did you have more difficulty falling asleep or staying asleep than usual? No .....1  
Yes .....2

\*\*\*\*\*

IF YES (Q50 = 2) THEN CONTINUE, ELSE GO TO Q52

\*\*\*\*\*

Q51 How often did you have these difficulties with sleep? Every night .....1  
Nearly every night .....2  
Less often .....3

Q52 Were you sleeping much more than usual? No .....1  
Yes .....2

\*\*\*\*\*

IF YES (Q52 = 2) THEN CONTINUE, ELSE GO TO Q54

\*\*\*\*\*

Q53 How often were you sleeping much more than usual? Every night .....1  
Nearly every night .....2  
Less often .....3

Q54 During that period, were you so fidgety or restless that you were unable to sit still? No .....1  
Yes .....2

Q55 Were you talking or moving much more slowly than is normal for you? No .....1  
Yes .....2

Q56 Did you feel fatigued or have less energy than usual? No .....1  
Yes .....2

Q57 Did you feel worthless or guilty? No .....1  
Yes .....2

Q58 Did you have difficulty thinking, concentrating or making decisions? No .....1  
Yes .....2

Q59 Did you think a lot about death - either your own, someone else's, or death in general? No .....1  
Yes .....2

Q60 How long did that period of time last, in weeks? \_/ \_/ \_ WEEKS

Q61 About how old were you when you experienced this worst period? \_\_\_/\_\_\_ YEARS

Q62 Did this worst period start within 2 months of the death of someone close to you or after a stressful or traumatic event in your life? No .....1  
Yes .....2

Q63 During that time, did you seek help from a doctor or other health professional? No .....1  
Yes .....2

Q64 How many periods have you had in your life where you felt depressed or lost interest in things every day or nearly every day for at least two weeks? \_\_\_/\_\_\_ PERIODS

Q65\_n How old were you the first time you had a period of at least two weeks like this (whether or not you received any help for it)? Please put your age in years. An approximate age is fine. \_\_\_/\_\_\_/\_\_\_ YEARS

Q66\_n How old were you the last time you had a period of at least two weeks like this (whether or not you received any help for it)? Please put your age in years. An approximate age is fine. \_\_\_/\_\_\_/\_\_\_ YEARS

\*\*\*\*\*  
IF FEMALE (Q4 = 2) AND HAS EVER BEEN PREGNANT (Q7 = 2) THEN CONTINUE  
ELSE GO TO Q70  
\*\*\*\*\*

Q67 Did any of your periods of depression (lasting two weeks or more) start during pregnancy or within the weeks or months following delivery? (If you experienced this in more than one pregnancy / after more than one delivery, please select all that apply.)

Q67\_1 No depression during or shortly after pregnancy .....1  
Q67\_2 Depression during pregnancy .....1  
Q67\_3 Depression within 4 weeks of delivery .....1  
Q67\_4 Depression between 4 and 6 weeks after delivery .....1  
Q67\_5 Depression between 6 weeks and 3 months after delivery .....1  
Q67\_6 Depression between 3 and 6 months after delivery .....1

\*\*\*\*\*  
IF NO (Q67\_1 = 1) GO TO Q469, ELSE CONTINUE  
\*\*\*\*\*

Q68 Were you ever treated for post-natal depression? No .....1  
Yes .....2

Q69 Have you ever had any periods of depression (lasting two weeks or more) that did not start during pregnancy or within the weeks or months following delivery? No .....1  
Yes .....2

The next few questions are about your experiences during and soon after pregnancy.

Q469 Are you currently pregnant? No .....1  
 Yes .....2

\*\*\*\*\*  
 IF YES (Q469 = 2) THEN CONTINUE, ELSE GO TO Q471  
 \*\*\*\*\*

Q347 How many times have you been pregnant? (please include your current pregnancy.) If you're unsure, please provide your best estimate. 1  
 2  
 3  
 4  
 5  
 6  
 7  
 8  
 9  
 10  
 11  
 12  
 13+

\*\*\*\*\*  
 IF Q347 = 2 OR MORE, CONTINUE, ELSE GO TO Q349  
 \*\*\*\*\*

Q470 How many of your previous pregnancies have resulted in live births (including caesarean section)? *Please DO NOT include your current pregnancy.* [NUMBER MUST BE LESS THAN OR EQUAL TO RESPONSE TO Q347] 0  
 1  
 2  
 3  
 4  
 5  
 6  
 7  
 8  
 9  
 10  
 11  
 12  
 13+

\*\*\*\*\*  
 GO TO Q349  
 \*\*\*\*\*

Q471 How many times have you been pregnant? If you're unsure, please provide your best estimate.

1  
2  
3  
4  
5  
6  
7  
8  
9  
10  
11  
12  
13+

Q348 How many of these pregnancies resulted in live births (including caesarean section)? [NUMBER MUST BE LESS THAN OR EQUAL TO RESPONSE TO Q471]

0  
1  
2  
3  
4  
5  
6  
7  
8  
9  
10  
11  
12  
13+

Q349 Have you ever been pregnant with twins (or triplets, etc.)?

No .....1  
Yes, twins .....2  
Yes, triplets (or more than triplets).....3  
Don't know.....4

\*\*\*\*\*

IF TWINS (Q349 = 2) THEN CONTINUE  
ELSE IF TRIPLETS OR MORE (Q349 = 3) THEN GO TO Q351  
ELSE GO TO Q364

\*\*\*\*\*

Q350 Are your twins? Identical (frequently mistaken by people who know them)? .....1  
Non-identical (no more alike than normal brothers or sisters)?.....2  
Unsure .....3

\*\*\*\*\*

GO TO Q352

\*\*\*\*\*

Q351 Are your triplets (or quads, etc.)? All identical (frequently mistaken by people who know them)? .....1  
 All non-identical (no more alike than normal brothers or sisters)?.....2  
 Some are identical to each other, but not all .....3  
 Unsure .....4

Q352 Were the twins (or triplets, etc.) conceived with the help of assisted reproduction technologies, such as IVF, hormone treatment or alternative/natural fertility treatment? No .....1  
 Yes .....2  
 Unsure .....3

Q364 During how many of your pregnancies did you feel sad, miserable, or very anxious? By this we mean a period of at least 2 weeks when you were not yourself and which was worse than the normal ups and downs of life. [NUMBER MUST BE LESS THAN OR EQUAL TO RESPONSE TO Q347/Q471] 0  
 1  
 2  
 3  
 4  
 5  
 6  
 7  
 8  
 9  
 10  
 11  
 12  
 13+

\*\*\*\*\*  
 IF NO PREGNANCIES (Q364 = 0) GO TO Q354 (MORNING SICKNESS).  
 IF EVER HAD ONE OR MORE LIVE BIRTHS (Q348 or Q470 = 1 OR MORE) THEN CONTINUE  
 ELSE GO TO Q366  
 \*\*\*\*\*

Q365 After how many of your deliveries, within the first six months postpartum, did you feel sad, miserable, or very anxious? By this we mean a period of at least 2 weeks, when you were not yourself and which was worse than the normal ups and downs of life. [NUMBER MUST BE LESS THAN OR EQUAL TO RESPONSE TO Q347/Q471] 0  
 1  
 2  
 3  
 4  
 5  
 6  
 7  
 8  
 9  
 10  
 11  
 12  
 13+

\*\*\*\*\*  
 IF EVER DEPRESSED DURING OR SOON AFTER PREGNANCY  
 (Q364 > 0 OR Q365 > 0) THEN CONTINUE  
 ELSE GO TO Q353  
 \*\*\*\*\*

|       |                                                                                                                                                                                                 |                                                                   |
|-------|-------------------------------------------------------------------------------------------------------------------------------------------------------------------------------------------------|-------------------------------------------------------------------|
| Q366  | Please think about the worst episode during pregnancy or after delivery. During the worst episode of feeling sad, miserable, or very anxious during pregnancy or following delivery, how often: |                                                                   |
| Q366A | Did you feel able to laugh or see the funny side of things?                                                                                                                                     | Never .....1<br>Rarely .....2<br>Sometimes .....3<br>Often .....4 |
| Q366B | Were you able to look forward to things with excitement?                                                                                                                                        | Never .....1<br>Rarely .....2<br>Sometimes .....3<br>Often .....4 |
| Q366C | Did you blame yourself unnecessarily when things went wrong?                                                                                                                                    | Never .....1<br>Rarely .....2<br>Sometimes .....3<br>Often .....4 |
| Q366D | Were you anxious or worried for no good reason?                                                                                                                                                 | Never .....1<br>Rarely .....2<br>Sometimes .....3<br>Often .....4 |
| Q366E | Did you feel scared or panicky for no good reason?                                                                                                                                              | Never .....1<br>Rarely .....2<br>Sometimes .....3<br>Often .....4 |
| Q366F | Did you feel overwhelmed?                                                                                                                                                                       | Never .....1<br>Rarely .....2<br>Sometimes .....3<br>Often .....4 |
| Q366G | Were you so unhappy that you had difficulty sleeping?                                                                                                                                           | Never .....1<br>Rarely .....2<br>Sometimes .....3<br>Often .....4 |
| Q366H | Did you feel sad or miserable?                                                                                                                                                                  | Never .....1<br>Rarely .....2<br>Sometimes .....3<br>Often .....4 |
| Q366I | Were you so unhappy that you cried?                                                                                                                                                             | Never .....1<br>Rarely .....2<br>Sometimes .....3<br>Often .....4 |
| Q366J | Did the thought of harming yourself occur to you?                                                                                                                                               | Never .....1<br>Rarely .....2<br>Sometimes .....3<br>Often .....4 |

---



Q367 During the worst episode of feeling sad, miserable, or very anxious during pregnancy or following delivery:

|                                                                                   |     |        |
|-----------------------------------------------------------------------------------|-----|--------|
| Q367A Were the symptoms so severe that you sought professional help?              | No  | .....1 |
|                                                                                   | Yes | .....2 |
| Q367B Did the symptoms cause you problems or interfere with your day-to-day life? | No  | .....1 |
|                                                                                   | Yes | .....2 |
| Q367C Did you require psychiatric hospitalisation because of these symptoms?      | No  | .....1 |
|                                                                                   | Yes | .....2 |

Q368 Did you receive any form of treatment such as counselling or medication because of depression during pregnancy or following delivery?

|                            |        |
|----------------------------|--------|
| No treatment               | .....1 |
| Counselling                | .....2 |
| Medication                 | .....3 |
| Counselling and medication | .....4 |

Q369 During the worst episode - when did these symptoms begin?

|                  |        |
|------------------|--------|
| During pregnancy | .....1 |
| After delivery   | .....2 |

\*\*\*\*\*  
 IF DURING PREGNANCY (Q369 = 1) THEN CONTINUE  
 IF AFTER DELIVERY (Q369 = 2) THEN GO TO Q371  
 \*\*\*\*\*

Q370 At approximately what stage of pregnancy did the symptoms begin?

|               |        |
|---------------|--------|
| 1st trimester | .....1 |
| 2nd trimester | .....2 |
| 3rd trimester | .....3 |

\*\*\*\*\*  
 GO TO Q372  
 \*\*\*\*\*

Q371 Approximately how long after delivery did the symptoms begin?

|                                     |        |
|-------------------------------------|--------|
| 0 - 4 weeks                         | .....1 |
| 1 - 3 months                        | .....2 |
| More than 3 months after deliver... | .....3 |

Q372 During the worst episode, how long did these symptoms last?

|                    |        |
|--------------------|--------|
| Up to 2 weeks      | .....1 |
| 2 - 4 weeks        | .....2 |
| 1 - 3 months       | .....3 |
| 3 - 6 months       | .....4 |
| More than 6 months | .....5 |

Q373 How old were you during the worst episode? \_\_\_\_\_/\_\_\_\_ YEARS

Q353 While many women experience morning sickness, there are differences in how severe morning sickness is. Did you have any morning sickness, nausea or vomiting during any of your pregnancies?

|     |        |
|-----|--------|
| No  | .....1 |
| Yes | .....2 |

\*\*\*\*\*  
 IF YES (Q353 = 2) THEN CONTINUE, ELSE GO TO Q361  
 \*\*\*\*\*

\*\*\*\*\*  
IF PREGNANT MORE THAN ONCE (Q347 > 1 OR Q471>1) THEN CONTINUE  
ELSE GO TO Q355  
\*\*\*\*\*

Q354 Thinking about all of the pregnancies you have had, during which pregnancy did you have the worst morning sickness? Please provide your answer as a number - for example answer 1 for your first pregnancy. [NUMBER MUST BE LESS THAN OR EQUAL TO RESPONSE TO Q347/Q471]

1  
2  
3  
4  
5  
6  
7  
8  
9  
10  
11  
12  
13+

---

Q355 Thinking back to each pregnancy, which of the following best describes your experience: Please choose one option for each pregnancy listed.

Q355A 1st pregnancy

I did not have any nausea or vomiting. ....1  
 Nausea and/or vomiting for less than 7 days, but I didn't see a doctor about this and it didn't disrupt my daily routine. ....2  
 Nausea and/or vomiting for more than 7 days, but I didn't see a doctor about this. It didn't disrupt my daily routine. ....3  
 It disrupted my daily routine but it didn't affect my weight and I didn't need medication to manage it. ....4  
 It really disrupted my daily routine and I was prescribed medication (or was put on a drip) but it didn't lead to weight loss. ....5  
 It really disrupted my daily routine. I lost weight. I was prescribed medication or was put on a drip or feeding tube. ....6  
 I don't remember or am unsure. ....7

Q355B Pregnancy with worst morning sickness [IF Q354 > 1]

I did not have any nausea or vomiting. ....1  
 Nausea and/or vomiting for less than 7 days, but I didn't see a doctor about this and it didn't disrupt my daily routine. ....2  
 Nausea and/or vomiting for more than 7 days, but I didn't see a doctor about this. It didn't disrupt my daily routine. ....3  
 It disrupted my daily routine but it didn't affect my weight and I didn't need medication to manage it. ....4  
 It really disrupted my daily routine and I was prescribed medication (or was put on a drip) but it didn't lead to weight loss. ....5  
 It really disrupted my daily routine. I lost weight. I was prescribed medication or was put on a drip or feeding tube. ....6  
 I don't remember or am unsure. ....7

- Q356 There are also differences in how long morning sickness lasts. Thinking back to each pregnancy listed, did you have any morning sickness ...
- Q356A In the first trimester (weeks 1 – 12) of the 1st pregnancy  
No .....1  
Yes .....2
- Q356B In the second trimester (weeks 13-24) of the 1st pregnancy  
No .....1  
Yes .....2
- Q356C In the third trimester (weeks 25 - birth) of the 1st pregnancy  
No .....1  
Yes .....2
- Q356D In the first trimester (weeks 1 – 12) of the pregnancy with the worst morning sickness [IF Q354 > 1]  
No .....1  
Yes .....2
- Q356E In the second trimester (weeks 13-24) of the pregnancy with the worst morning sickness [IF Q354 > 1]  
No .....1  
Yes .....2
- Q356F In the third trimester (weeks 25 - birth) of the pregnancy with the worst morning sickness [IF Q354 > 1]  
No .....1  
Yes .....2

- Q357 Did you go to a hospital because of nausea or vomiting during each pregnancy listed (even if you weren't admitted)?
- Q357A In your 1st pregnancy  
No .....1  
Yes .....2
- Q357A In the pregnancy with the worst morning sickness [IF Q354 > 1]  
No .....1  
Yes .....2

- Q358 How old were you at the start of ...
- Q358A Your 1st pregnancy \_\_\_\_\_ YEARS
- Q358B The pregnancy with the worst morning sickness [IF Q354 > 1] \_\_\_\_\_ YEARS

\*\*\*\*\*  
IF NEVER MULTIPLE PREGNANCY (Q349 ≠ 2 OR 3) THEN CONTINUE  
ELSE GO TO Q360  
\*\*\*\*\*

- Q359 Were you pregnant with ...
- Q359A 1st pregnancy  
A boy .....1  
A girl .....2  
Don't know.....3
- Q359B The pregnancy with the worst morning sickness [IF Q354 > 1]  
A boy .....1  
A girl .....2  
Don't know.....3

\*\*\*\*\*  
GO TO Q361  
\*\*\*\*\*

Q360 Were you pregnant with ...

Q360A 1st pregnancy

\_\_ BOYS  
\_\_ GIRLS  
\_\_ UNKNOWN SEX

Q360B The pregnancy with the worst morning sickness [IF Q354 > 1]

\_\_ BOYS  
\_\_ GIRLS  
\_\_ UNKNOWN SEX

\*\*\*\*\*  
IF EVER HAD ONE OR MORE LIVE BIRTHS (Q348 or Q470 = 1 OR MORE) THEN CONTINUE  
ELSE GO TO Q70  
\*\*\*\*\*

Q361 Did you breastfeed any of your children? Please include any breastfeeding even if you were also bottle-feeding.

None of my children were  
breastfed .....1  
Only some of my children were  
breastfed .....2  
All of my children were breastfed ..3

\*\*\*\*\*  
IF ONLY SOME (Q361 = 2) THEN CONTINUE  
IF ALL (Q361 = 3) GO TO Q363  
IF NONE (Q361 = 1) GO TO Q70  
\*\*\*\*\*

Q362 Did you breastfeed your first child? Please include any breastfeeding even if you were also bottle-feeding.

No .....1  
Yes .....2

\*\*\*\*\*  
IF YES (Q359 = 2) THEN CONTINUE, ELSE GO TO Q70  
\*\*\*\*\*

Q363 How long (in months) did you breastfeed your first child for? Please include any breastfeeding even if you were also bottle-feeding.

\_\_/\_ MONTHS

Q70 As stated in the consent form you read before commencing the questionnaire, all of the information you provide is kept confidential, unless someone is at risk of serious harm. Your responses to the questions in the next section will be reviewed by one of our staff, who may contact you if your responses indicate you are at risk of serious harm.

Q71 Have you ever injured yourself on purpose?

No .....1  
Yes .....2

\*\*\*\*\*  
IF YES (Q71 = 2) CONTINUE, ELSE GO TO Q73  
\*\*\*\*\*

|       |                                                                   |                                                                                                                                                   |
|-------|-------------------------------------------------------------------|---------------------------------------------------------------------------------------------------------------------------------------------------|
| Q72   | Did you intend to ...                                             |                                                                                                                                                   |
| Q72_2 | ... experience pain or suffering as a result of your self-injury? | Not at all .....1<br>[unlabelled intermediate] .....2<br>[unlabelled intermediate] .....3<br>[unlabelled intermediate] .....4<br>Very much .....5 |
| Q72_9 | ... die as a result of your self-injury?                          | Not at all .....1<br>[unlabelled intermediate] .....2<br>[unlabelled intermediate] .....3<br>[unlabelled intermediate] .....4<br>Very much .....5 |

---

|     |                                                                   |                                                                                                                                                                                                                                                                                                                                                                     |
|-----|-------------------------------------------------------------------|---------------------------------------------------------------------------------------------------------------------------------------------------------------------------------------------------------------------------------------------------------------------------------------------------------------------------------------------------------------------|
| Q73 | In the past month, how often have you had thoughts about suicide? | Never .....1<br>[unlabelled intermediate] .....2<br>[unlabelled intermediate] .....3<br>[unlabelled intermediate] .....4<br>[unlabelled intermediate] .....5<br>[unlabelled intermediate] .....6<br>[unlabelled intermediate] .....7<br>[unlabelled intermediate] .....8<br>[unlabelled intermediate] .....9<br>[unlabelled intermediate] .....10<br>Always .....11 |
|-----|-------------------------------------------------------------------|---------------------------------------------------------------------------------------------------------------------------------------------------------------------------------------------------------------------------------------------------------------------------------------------------------------------------------------------------------------------|

\*\*\*\*\*  
 IF NEVER (Q73 = 1) GO TO Q78, ELSE CONTINUE  
 \*\*\*\*\*

---

|     |                                                                       |                                                                                                                                                                                                                                                                                                                                                                                                 |
|-----|-----------------------------------------------------------------------|-------------------------------------------------------------------------------------------------------------------------------------------------------------------------------------------------------------------------------------------------------------------------------------------------------------------------------------------------------------------------------------------------|
| Q74 | In the past month, how much control have you had over these thoughts? | No control / do not control .....1<br>[unlabelled intermediate] .....2<br>[unlabelled intermediate] .....3<br>[unlabelled intermediate] .....4<br>[unlabelled intermediate] .....5<br>[unlabelled intermediate] .....6<br>[unlabelled intermediate] .....7<br>[unlabelled intermediate] .....8<br>[unlabelled intermediate] .....9<br>[unlabelled intermediate] .....10<br>Full control .....11 |
|-----|-----------------------------------------------------------------------|-------------------------------------------------------------------------------------------------------------------------------------------------------------------------------------------------------------------------------------------------------------------------------------------------------------------------------------------------------------------------------------------------|

---

|     |                                                                         |                                                                                                                                                                                                                                                                                                                                                                                              |
|-----|-------------------------------------------------------------------------|----------------------------------------------------------------------------------------------------------------------------------------------------------------------------------------------------------------------------------------------------------------------------------------------------------------------------------------------------------------------------------------------|
| Q75 | In the past month, how close have you come to making a suicide attempt? | Not at all close .....1<br>[unlabelled intermediate] .....2<br>[unlabelled intermediate] .....3<br>[unlabelled intermediate] .....4<br>[unlabelled intermediate] .....5<br>[unlabelled intermediate] .....6<br>[unlabelled intermediate] .....7<br>[unlabelled intermediate] .....8<br>[unlabelled intermediate] .....9<br>[unlabelled intermediate] .....10<br>Have made an attempt .....11 |
|-----|-------------------------------------------------------------------------|----------------------------------------------------------------------------------------------------------------------------------------------------------------------------------------------------------------------------------------------------------------------------------------------------------------------------------------------------------------------------------------------|

---

|     |                                                                                   |                           |         |
|-----|-----------------------------------------------------------------------------------|---------------------------|---------|
| Q76 | In the past month, to what extent have you felt tormented by thoughts of suicide? | Not at all                | .....1  |
|     |                                                                                   | [unlabelled intermediate] | .....2  |
|     |                                                                                   | [unlabelled intermediate] | .....3  |
|     |                                                                                   | [unlabelled intermediate] | .....4  |
|     |                                                                                   | [unlabelled intermediate] | .....5  |
|     |                                                                                   | [unlabelled intermediate] | .....6  |
|     |                                                                                   | [unlabelled intermediate] | .....7  |
|     |                                                                                   | [unlabelled intermediate] | .....8  |
|     |                                                                                   | [unlabelled intermediate] | .....9  |
|     |                                                                                   | [unlabelled intermediate] | .....10 |
|     |                                                                                   | Extremely                 | .....11 |

|     |                                                                                                                                                                         |                           |         |
|-----|-------------------------------------------------------------------------------------------------------------------------------------------------------------------------|---------------------------|---------|
| Q77 | In the past month, how much have thoughts about suicide interfered with your ability to carry out daily activities, such as work, household tasks or social activities? | Not at all                | .....1  |
|     |                                                                                                                                                                         | [unlabelled intermediate] | .....2  |
|     |                                                                                                                                                                         | [unlabelled intermediate] | .....3  |
|     |                                                                                                                                                                         | [unlabelled intermediate] | .....4  |
|     |                                                                                                                                                                         | [unlabelled intermediate] | .....5  |
|     |                                                                                                                                                                         | [unlabelled intermediate] | .....6  |
|     |                                                                                                                                                                         | [unlabelled intermediate] | .....7  |
|     |                                                                                                                                                                         | [unlabelled intermediate] | .....8  |
|     |                                                                                                                                                                         | [unlabelled intermediate] | .....9  |
|     |                                                                                                                                                                         | [unlabelled intermediate] | .....10 |
|     |                                                                                                                                                                         | Extremely                 | .....11 |

|     |                                                         |     |        |
|-----|---------------------------------------------------------|-----|--------|
| Q78 | Have you ever seriously thought about killing yourself? | No  | .....1 |
|     |                                                         | Yes | .....2 |

|     |                                                              |     |        |
|-----|--------------------------------------------------------------|-----|--------|
| Q79 | Have you ever made a plan about how you would kill yourself? | No  | .....1 |
|     |                                                              | Yes | .....2 |

Q80                      How many times have you actually tried to kill yourself?                        /  /   TIMES

\*\*\*\*\*  
 IF EVER SERIOUS SUICIDAL THOUGHTS, PLANS OR ACTIONS  
 (Q78 = 2 OR Q79 = 2 OR Q80 > 0) CONTINUE  
 ELSE IF ANY SUICIDAL THOUGHTS IN PAST MONTH (Q73 > 1) GO TO Q82  
 ELSE GO TO Q84  
 \*\*\*\*\*

Q81\_n                      What was the earliest age at which you had serious thoughts about killing yourself, made a plan about how you would kill yourself, or actually tried to kill yourself?                        /   YEARS

Q82 You may find it helpful to talk to a Lifeline counsellor. Autocoded .....1  
 Lifeline have telephone counsellors, available 24 hours a day, who are trained and have experience talking with people who are having difficulties and who feel so bad that taking their own life sometimes seems to be the only answer. Even more importantly, the counsellors can give you ideas about where and how to get further help. Contact details for Lifeline are below, so please write them down.  
 PHONE NUMBER FOR LIFELINE: 13 11 14  
 WEBSITE: www.lifeline.org.au  
 General information about mental health can be found at:  
 BEYOND BLUE WEBSITE: www.beyondblue.org.au

Q83 Have any of your first degree relatives (that is a parent, brother, sister or child) ever been diagnosed with a mental health disorder? No .....1  
 Yes .....2

\*\*\*\*\*  
 IF ANY FIRST DEGREE RELATIVES DIAGNOSED (Q83 = 2)  
 CONTINUE, ELSE GO TO Q85  
 \*\*\*\*\*

Q84 Which mental health disorders has/have your first degree relative(s) been diagnosed with? (Please select all that apply, including if multiple family members have had different diagnoses.)

Q84\_1 Depression Yes .....1  
 Q84\_2 Bipolar disorder Yes .....1  
 Q84\_3 Schizophrenia Yes .....1  
 Q84\_4 Anorexia nervosa Yes .....1  
 Q84\_5 Bulimia Yes .....1  
 Q84\_6 Anxiety (Generalised anxiety disorder) Yes .....1  
 Q84\_7 Panic disorder Yes .....1  
 Q84\_8 Obsessive compulsive disorder Yes .....1  
 Q84\_9 Posttraumatic stress disorder Yes .....1  
 Q84\_10 Specific phobia Yes .....1  
 Q84\_11 Seasonal affective disorder Yes .....1  
 Q84\_12 Social phobia (also known as Social anxiety disorder) Yes .....1  
 Q84\_13 Attention-deficit/hyperactivity disorder (ADD/ADHD) Yes .....1  
 Q84\_14 Autism spectrum disorder (Autism, Asperger's disorder) Yes .....1  
 Q84\_15 Tourette's disorder Yes .....1  
 Q84\_16 Personality disorder Yes .....1  
 Q84\_17 Substance use disorder Yes .....1  
 Q84\_18 Other (please specify) Yes .....1  
 Q84\_18\_TEXT Specified other mental health disorder \_\_\_\_\_



|       |                                                                                             |                                              |
|-------|---------------------------------------------------------------------------------------------|----------------------------------------------|
| Q85   | Have you ever experienced a definite period where for more than 2 or 3 days ...             |                                              |
| Q85_1 | You felt much happier or more cheerful than usual?                                          | No .....1<br>Yes .....2<br>Don't know .....3 |
| Q85_2 | You felt much more self-confident than usual?                                               | No .....1<br>Yes .....2<br>Don't know .....3 |
| Q85_3 | You needed much less sleep than usual?                                                      | No .....1<br>Yes .....2<br>Don't know .....3 |
| Q85_4 | You talked much more than usual?                                                            | No .....1<br>Yes .....2<br>Don't know .....3 |
| Q85_5 | You were much more active (either socially, sexually, at work, home, or school) than usual? | No .....1<br>Yes .....2<br>Don't know .....3 |

\*\*\*\*\*  
 IF EVER EXPERIENCED ANY OF THE ABOVE (ANY OF Q85\_1 TO Q85\_5 = 2)  
 CONTINUE, ELSE GO TO Q92  
 \*\*\*\*\*

---

|     |                                          |                         |
|-----|------------------------------------------|-------------------------|
| Q86 | Has this happened in the last 12 months? | No .....1<br>Yes .....2 |
|-----|------------------------------------------|-------------------------|

---

|       |                                                                                                              |               |
|-------|--------------------------------------------------------------------------------------------------------------|---------------|
| Q87_n | How old were you when this problem first began?<br>Please put your age in years. An approximate age is fine. | ___/___ YEARS |
|-------|--------------------------------------------------------------------------------------------------------------|---------------|

---

|       |                                                                                                                             |               |
|-------|-----------------------------------------------------------------------------------------------------------------------------|---------------|
| Q88_n | How old were you when you most recently experienced this problem? Please put your age in years. An approximate age is fine. | ___/___ YEARS |
|-------|-----------------------------------------------------------------------------------------------------------------------------|---------------|

---

|       |                                                                                                                                          |                   |
|-------|------------------------------------------------------------------------------------------------------------------------------------------|-------------------|
| Q89_n | How many times in your life did any of these experiences ever happen? An approximate number is fine. If 1000 times or more, enter '999'. | ___/___/___ TIMES |
|-------|------------------------------------------------------------------------------------------------------------------------------------------|-------------------|

\*\*\*\*\*  
 IF TAKEN ANY NAMED ANTIDEPRESSANTS  
 (ANY OF Q10\_1 TO Q10\_10 OR Q11\_1 TO Q11\_11 = 1) CONTINUE  
 ELSE GO TO Q92  
 \*\*\*\*\*

---

|        |                                                                                             |                                              |
|--------|---------------------------------------------------------------------------------------------|----------------------------------------------|
| Q90    | Did you ever experience this problem while you were taking the following antidepressant(s)? |                                              |
| Q90_1  | Sertraline (e.g. Zoloft, Eleva, Sertra, Sertracor, Setrona, Xydep)                          | No .....1<br>Yes .....2<br>Don't know .....3 |
| Q90_2  | Escitalopram (e.g. Lexapro, Cilopam, Escicor, Esipram, Esitalo, Lexam, LoxaLate)            | No .....1<br>Yes .....2<br>Don't know .....3 |
| Q90_3  | Venlafaxine (e.g. Efexor, Altven, Elaxine, Enlafax, Venla, Venlexor)                        | No .....1<br>Yes .....2<br>Don't know .....3 |
| Q90_4  | Amitriptyline (e.g. Endep)                                                                  | No .....1<br>Yes .....2<br>Don't know .....3 |
| Q90_5  | Mirtazapine (e.g. Avanza, Remeron, Milivin, Axit, Aurozapine, Mirtazon)                     | No .....1<br>Yes .....2<br>Don't know .....3 |
| Q90_6  | Desvenlafaxine (e.g. Pristiq, Desfax)                                                       | No .....1<br>Yes .....2<br>Don't know .....3 |
| Q90_7  | Citalopram (e.g. Cipramil, Celapram, Celica, Ciazil, Citalo, Talam)                         | No .....1<br>Yes .....2<br>Don't know .....3 |
| Q90_8  | Fluoxetine (e.g. Prozac, Auscap, Lovan, Zactin)                                             | No .....1<br>Yes .....2<br>Don't know .....3 |
| Q90_9  | Duloxetine (e.g. Cymbalta, Andepra, Coperin, Deotine, Depreta, Drulox)                      | No .....1<br>Yes .....2<br>Don't know .....3 |
| Q90_10 | Paroxetine (e.g. Aropax, Paxtine, Extine, Roxet)                                            | No .....1<br>Yes .....2<br>Don't know .....3 |
| Q90_11 | Dothiepin (e.g. Dothep)                                                                     | No .....1<br>Yes .....2<br>Don't know .....3 |
| Q90_12 | Fluvoxamine (e.g. Luvox, Faverin, Movox, Voxam)                                             | No .....1<br>Yes .....2<br>Don't know .....3 |
| Q90_13 | Doxepin (e.g. Sinequan, Deptran)                                                            | No .....1<br>Yes .....2<br>Don't know .....3 |
| Q90_14 | Nortriptyline (e.g. Allegron)                                                               | No .....1<br>Yes .....2<br>Don't know .....3 |
| Q90_15 | Moclobemide (e.g. Amina, Clobemix, Mohexal, Aurorix)                                        | No .....1<br>Yes .....2<br>Don't know .....3 |

|        |                                       |                                              |
|--------|---------------------------------------|----------------------------------------------|
| Q90_16 | Clomipramine (e.g. Anafranil, Placil) | No .....1<br>Yes .....2<br>Don't know .....3 |
| Q90_17 | Reboxetine (e.g. Edronax)             | No .....1<br>Yes .....2<br>Don't know .....3 |
| Q90_18 | Mianserin (e.g. Lumin)                | No .....1<br>Yes .....2<br>Don't know .....3 |
| Q90_19 | Imipramine (e.g. Tofranil, Tolerade)  | No .....1<br>Yes .....2<br>Don't know .....3 |
| Q90_20 | Tranlycypromine (e.g. Parnate)        | No .....1<br>Yes .....2<br>Don't know .....3 |
| Q90_21 | Phenelzine (e.g. Nardil)              | No .....1<br>Yes .....2<br>Don't know .....3 |

---

|     |                                                                        |                         |
|-----|------------------------------------------------------------------------|-------------------------|
| Q91 | Did you ever experience this problem while not taking antidepressants? | No .....1<br>Yes .....2 |
|-----|------------------------------------------------------------------------|-------------------------|

---

|       |                                                                      |                         |
|-------|----------------------------------------------------------------------|-------------------------|
| Q92   | Have you ever.....                                                   |                         |
| Q92_1 | Felt as if the thoughts in your head were not your own?              | No .....1<br>Yes .....2 |
| Q92_2 | Heard voices talking to each other when you were alone?              | No .....1<br>Yes .....2 |
| Q92_3 | Heard voices when you were alone?                                    | No .....1<br>Yes .....2 |
| Q92_4 | Felt that many people around you might hurt or harm you in some way? | No .....1<br>Yes .....2 |
| Q92_5 | Felt as if many people around you are plotting against you?          | No .....1<br>Yes .....2 |
| Q92_6 | Felt as if the thoughts in your head are being taken away from you?  | No .....1<br>Yes .....2 |

\*\*\*\*\*  
 IF EVER ANY OF THESE SYMPTOMS (ANY OF Q92\_1 TO Q92\_6)  
 THEN CONTINUE, ELSE GO TO Q103  
 \*\*\*\*\*

---

\*\*\*\*\*  
 IF EVER FELT THOUGHTS NOT THEIR OWN (Q92\_1 = 2) THEN CONTINUE  
 ELSE GO TO Q94  
 \*\*\*\*\*

- Q93
- |                                                                                                            |                  |   |
|------------------------------------------------------------------------------------------------------------|------------------|---|
| When you have felt as if the thoughts in your head were not your own – did this ever happen when you were: | No .....         | 1 |
|                                                                                                            | Yes .....        | 2 |
| • not dreaming                                                                                             | Don't know ..... | 3 |
| • not half-asleep and                                                                                      |                  |   |
| • not under the influence of alcohol or drugs?                                                             |                  |   |

\*\*\*\*\*  
 IF EVER HEARD VOICES TALKING TO EACH OTHER (Q92\_2 = 2)  
 THEN CONTINUE, ELSE GO TO Q95  
 \*\*\*\*\*

- Q94
- |                                                                                                            |                  |   |
|------------------------------------------------------------------------------------------------------------|------------------|---|
| When you have heard voices talking to each other when you were alone – did this ever happen when you were: | No .....         | 1 |
|                                                                                                            | Yes .....        | 2 |
| • not dreaming                                                                                             | Don't know ..... | 3 |
| • not half-asleep and                                                                                      |                  |   |
| • not under the influence of alcohol or drugs?                                                             |                  |   |

\*\*\*\*\*  
 IF EVER HEARD VOICES WHEN ALONE (Q92\_3 = 2) THEN CONTINUE  
 ELSE GO TO Q96  
 \*\*\*\*\*

- Q95
- |                                                                                      |                  |   |
|--------------------------------------------------------------------------------------|------------------|---|
| When you have heard voices when you were alone - did this ever happen when you were: | No .....         | 1 |
|                                                                                      | Yes .....        | 2 |
| • not dreaming                                                                       | Don't know ..... | 3 |
| • not half-asleep and                                                                |                  |   |
| • not under the influence of alcohol or drugs?                                       |                  |   |

\*\*\*\*\*  
 IF EVER FELT MANY PEOPLE MIGHT HURT OR HARM (Q92\_4 = 2)  
 THEN CONTINUE ELSE GO TO Q97  
 \*\*\*\*\*

- Q96
- |                                                                                                                         |                  |   |
|-------------------------------------------------------------------------------------------------------------------------|------------------|---|
| When you have felt that many people around you might hurt or harm you in some way – did this ever happen when you were: | No .....         | 1 |
|                                                                                                                         | Yes .....        | 2 |
| • not dreaming                                                                                                          | Don't know ..... | 3 |
| • not half-asleep and                                                                                                   |                  |   |
| • not under the influence of alcohol or drugs?                                                                          |                  |   |

\*\*\*\*\*  
 IF EVER FELT MANY PEOPLE PLOTTING (Q92\_5 = 2) THEN CONTINUE  
 ELSE GO TO Q98  
 \*\*\*\*\*

- Q97
- |                                                                                                                |                  |   |
|----------------------------------------------------------------------------------------------------------------|------------------|---|
| When you have felt as if many people around you are plotting against you – did this ever happen when you were: | No .....         | 1 |
|                                                                                                                | Yes .....        | 2 |
| • not dreaming                                                                                                 | Don't know ..... | 3 |
| • not half-asleep and                                                                                          |                  |   |
| • not under the influence of alcohol or drugs?                                                                 |                  |   |

\*\*\*\*\*  
 IF EVER FELT THOUGHTS IN HEAD BEING TAKEN (Q92\_6 = 2)  
 THEN CONTINUE, ELSE GO TO Q99  
 \*\*\*\*\*

|                                                                         |                                                                                                                                                                                                                                                                                |                                                                                                                                                                           |
|-------------------------------------------------------------------------|--------------------------------------------------------------------------------------------------------------------------------------------------------------------------------------------------------------------------------------------------------------------------------|---------------------------------------------------------------------------------------------------------------------------------------------------------------------------|
| Q98                                                                     | When you have felt as if the thoughts in your head are being taken away from you - did this ever happen when you were: <ul style="list-style-type: none"> <li>• not dreaming</li> <li>• not half-asleep and</li> <li>• not under the influence of alcohol or drugs?</li> </ul> | No .....1<br>Yes .....2<br>Don't know .....3                                                                                                                              |
| <hr/>                                                                   |                                                                                                                                                                                                                                                                                |                                                                                                                                                                           |
| Q99                                                                     | Did any of these experiences occur in the last 12 months?                                                                                                                                                                                                                      | No .....1<br>Yes .....2<br>Don't know .....3                                                                                                                              |
| <hr/>                                                                   |                                                                                                                                                                                                                                                                                |                                                                                                                                                                           |
| Q100_n                                                                  | How old were you when you first had any of these experiences? Please put your age in years. An approximate age is fine.                                                                                                                                                        | _/_ YEA RS                                                                                                                                                                |
| <hr/>                                                                   |                                                                                                                                                                                                                                                                                |                                                                                                                                                                           |
| Q101_n                                                                  | How old were you when you most recently had any of these experiences? Please put your age in years. An approximate age is fine.                                                                                                                                                | _/_ YEA RS                                                                                                                                                                |
| <hr/>                                                                   |                                                                                                                                                                                                                                                                                |                                                                                                                                                                           |
| Q102_n                                                                  | How many times in your life did any of these experiences ever happen? An approximate number is fine. If 1000 times or more, enter '999'.                                                                                                                                       | _/_/_ TI MES                                                                                                                                                              |
| <hr/>                                                                   |                                                                                                                                                                                                                                                                                |                                                                                                                                                                           |
| Q103                                                                    | Have you ever had a period lasting one month or longer when most of the time you felt worried, tense or anxious?                                                                                                                                                               | No .....1<br>Yes .....2                                                                                                                                                   |
| *****                                                                   |                                                                                                                                                                                                                                                                                |                                                                                                                                                                           |
| IF EVER ONE MONTH OR LONGER (Q103 = 2) THEN GO TO Q107<br>ELSE CONTINUE |                                                                                                                                                                                                                                                                                |                                                                                                                                                                           |
| *****                                                                   |                                                                                                                                                                                                                                                                                |                                                                                                                                                                           |
| <hr/>                                                                   |                                                                                                                                                                                                                                                                                |                                                                                                                                                                           |
| Q104                                                                    | People differ a lot in how much they worry about things. Did you ever have a time when you worried a lot more than most people would in your situation?                                                                                                                        | No .....1<br>Yes .....2                                                                                                                                                   |
| *****                                                                   |                                                                                                                                                                                                                                                                                |                                                                                                                                                                           |
| IF EVER SUCH A TIME (Q104 = 2) THEN CONTINUE<br>ELSE GO TO Q119         |                                                                                                                                                                                                                                                                                |                                                                                                                                                                           |
| *****                                                                   |                                                                                                                                                                                                                                                                                |                                                                                                                                                                           |
| <hr/>                                                                   |                                                                                                                                                                                                                                                                                |                                                                                                                                                                           |
| Q107                                                                    | How long was the longest time that this kind of worrying lasted?                                                                                                                                                                                                               | Less than 6 months .....1<br>Between 6 and 12 months .....2<br>Between 1 and 5 years .....3<br>More than 5 years .....4<br>All my life / As long as I can remember .....5 |
| <hr/>                                                                   |                                                                                                                                                                                                                                                                                |                                                                                                                                                                           |

|        |                                                                                                                                                                                                                             |                         |
|--------|-----------------------------------------------------------------------------------------------------------------------------------------------------------------------------------------------------------------------------|-------------------------|
| Q119   | The next questions are about things that make some people so afraid that they avoid them or they endure them with intense fear or anxiety. Do you have (or have you ever had) a strong fear of any of the following things: |                         |
| Q119_1 | Environment (e.g. heights, storms, thunder, lightning, or being in still water, like a swimming pool or lake?)                                                                                                              | No .....1<br>Yes .....2 |
| Q119_2 | Situations (e.g. being in an airplane, elevator, or a closed space like a cave or tunnel)?                                                                                                                                  | No .....1<br>Yes .....2 |
| Q119_3 | Animals (e.g. snakes, birds, rats, insects, dogs, or other animals)?                                                                                                                                                        | No .....1<br>Yes .....2 |
| Q119_4 | Blood, injections or injury (e.g. blood, needles, medical procedures?)                                                                                                                                                      | No .....1<br>Yes .....2 |

\*\*\*\*\*  
 IF EVER HAD ANY OF THESE (Q119\_1, Q119\_2, Q119\_3 OR Q119\_4 = 2)  
 THEN CONTINUE, ELSE GO TO Q127  
 \*\*\*\*\*

---

Q120 Please think about these situations that you fear (or feared):

---

|      |                                                                                 |                                                                                                                       |
|------|---------------------------------------------------------------------------------|-----------------------------------------------------------------------------------------------------------------------|
| Q121 | How often do (or did) these situations cause immediate fear or anxiety for you? | Always .....1<br>Almost always .....2<br>Some of the time .....3<br>Only one or two times ever .....4<br>Never .....5 |
|------|---------------------------------------------------------------------------------|-----------------------------------------------------------------------------------------------------------------------|

\*\*\*\*\*  
 IF ALWAYS OR ALMOST ALWAYS (Q121 = 1 OR 2) THEN CONTINUE  
 ELSE GO TO Q127  
 \*\*\*\*\*

---

Q127 Do you have (or have you ever had) a strong fear of, or are (were) you extremely anxious about, any of the following situations?

|        |                                                                                                |                         |
|--------|------------------------------------------------------------------------------------------------|-------------------------|
| Q127_1 | Being in social situations (e.g. talking with and meeting unfamiliar people)                   | No .....1<br>Yes .....2 |
| Q127_2 | Being observed (e.g. eating or drinking while others are watching, talking in front of others) | No .....1<br>Yes .....2 |

\*\*\*\*\*  
 IF EVER HAD EITHER (Q127\_1 OR Q127\_2 = 2) THEN CONTINUE  
 ELSE GO TO Q137  
 \*\*\*\*\*

---

|      |                                                                                          |                         |
|------|------------------------------------------------------------------------------------------|-------------------------|
| Q128 | Are (or were) you worried about what other people will think in these social situations? | No .....1<br>Yes .....2 |
|------|------------------------------------------------------------------------------------------|-------------------------|

---

|      |                                                                       |                                                                                                                       |
|------|-----------------------------------------------------------------------|-----------------------------------------------------------------------------------------------------------------------|
| Q129 | How often do (or did) these situations cause fear or anxiety for you? | Always .....1<br>Almost always .....2<br>Some of the time .....3<br>Only one or two times ever .....4<br>Never .....5 |
|------|-----------------------------------------------------------------------|-----------------------------------------------------------------------------------------------------------------------|

---

|        |                                                                                                                                                                                                                             |                         |
|--------|-----------------------------------------------------------------------------------------------------------------------------------------------------------------------------------------------------------------------------|-------------------------|
| Q137   | This is a list of situations which some people actively avoid, need a companion with them for, or endure with intense fear or anxiety. Do you have (or have you ever had) a strong fear of any of the following situations? |                         |
| Q137_1 | Using public transportation (e.g. cars, buses, trains, ships, planes)                                                                                                                                                       | No .....1<br>Yes .....2 |
| Q137_2 | Being in open spaces (e.g. parking lots, marketplaces, bridges)                                                                                                                                                             | No .....1<br>Yes .....2 |
| Q137_3 | Being in enclosed spaces (e.g. shops, theatres, cinemas)                                                                                                                                                                    | No .....1<br>Yes .....2 |
| Q137_4 | Standing in line or being in a crowd                                                                                                                                                                                        | No .....1<br>Yes .....2 |
| Q137_5 | Being outside of the home alone                                                                                                                                                                                             | No .....1<br>Yes .....2 |

\*\*\*\*\*  
 IF EVER HAD ANY OF THESE  
 (Q137\_1, Q137\_2, Q137\_3, Q137\_4 OR Q137\_5 = 2)  
 THEN CONTINUE ELSE GO TO Q147  
 \*\*\*\*\*

---

Q138 Please think about these situations that you fear (or feared):

---

|      |                                                                       |                                                                                                                       |
|------|-----------------------------------------------------------------------|-----------------------------------------------------------------------------------------------------------------------|
| Q139 | How often do (or did) these situations cause fear or anxiety for you? | Always .....1<br>Almost always .....2<br>Some of the time .....3<br>Only one or two times ever .....4<br>Never .....5 |
|------|-----------------------------------------------------------------------|-----------------------------------------------------------------------------------------------------------------------|

---

|         |                                                                                                                                                                                                                            |            |
|---------|----------------------------------------------------------------------------------------------------------------------------------------------------------------------------------------------------------------------------|------------|
| Q147    | Have you ever had a sudden, unexpected surge of intense fear or intense discomfort (panic attack) during which you experienced some of the following symptoms? (Please select all symptoms that occurred at the same time) |            |
| Q147_1  | Your heart was pounding or racing                                                                                                                                                                                          | Yes .....1 |
| Q147_2  | You were sweating                                                                                                                                                                                                          | Yes .....1 |
| Q147_3  | You were trembling or shaking                                                                                                                                                                                              | Yes .....1 |
| Q147_4  | You felt short of breath, or like you were being smothered                                                                                                                                                                 | Yes .....1 |
| Q147_5  | You felt like you were choking                                                                                                                                                                                             | Yes .....1 |
| Q147_6  | You had pain or discomfort in your chest                                                                                                                                                                                   | Yes .....1 |
| Q147_7  | You were nauseous or felt sick in the stomach                                                                                                                                                                              | Yes .....1 |
| Q147_8  | You felt dizzy, unsteady, light-headed or faint                                                                                                                                                                            | Yes .....1 |
| Q147_9  | You felt hot or cold                                                                                                                                                                                                       | Yes .....1 |
| Q147_10 | You felt numbness or tingling sensations                                                                                                                                                                                   | Yes .....1 |
| Q147_11 | It felt like things weren't real, or you felt detached from yourself                                                                                                                                                       | Yes .....1 |
| Q147_12 | You were afraid you were going to lose control or "go crazy"                                                                                                                                                               | Yes .....1 |
| Q147_13 | You were afraid you were going to die                                                                                                                                                                                      | Yes .....1 |
| Q147_14 | No, I have never had this happen to me                                                                                                                                                                                     | Yes .....1 |

|          |                                                                           |                    |
|----------|---------------------------------------------------------------------------|--------------------|
| Q156     | How tall are you? (Please enter centimetres or feet and inches, not both) |                    |
| Q156_1_n | Height (feet component)                                                   | __ FEET            |
| Q156_2_n | Height (inches component)                                                 | __/_ INCHES        |
| Q156_3_n | Height (centimetres)                                                      | __/_/_ CENTIMETRES |

|      |                                                                                                             |                  |
|------|-------------------------------------------------------------------------------------------------------------|------------------|
| Q157 | How much do you weigh now (in kilograms)? If you are pregnant, what did you weigh before you were pregnant? | __/_/_ KILOGRAMS |
|------|-------------------------------------------------------------------------------------------------------------|------------------|

|      |                                          |                                                                                                                                                                                                                                                                                                                                                                                                                                                                                                                   |
|------|------------------------------------------|-------------------------------------------------------------------------------------------------------------------------------------------------------------------------------------------------------------------------------------------------------------------------------------------------------------------------------------------------------------------------------------------------------------------------------------------------------------------------------------------------------------------|
| Q160 | What is your highest level of education? | No formal education .....1<br>Completed or partially completed primary school (years 1-7) .....2<br>Completed or partially completed junior secondary school (years 8-10) .....3<br>Completed or partially completed senior secondary school (years 11-12) .....4<br>Completed or partially completed certificate or diploma .....5<br>Completed or partially completed a degree .....6<br>Completed or partially completed a Post Graduate Diploma, Masters degree, Doctorate or PhD .....7<br>Don't know .....8 |
|------|------------------------------------------|-------------------------------------------------------------------------------------------------------------------------------------------------------------------------------------------------------------------------------------------------------------------------------------------------------------------------------------------------------------------------------------------------------------------------------------------------------------------------------------------------------------------|

|      |                                                                                                                                                                                                                                    |  |
|------|------------------------------------------------------------------------------------------------------------------------------------------------------------------------------------------------------------------------------------|--|
| Q460 | Thinking about what you know of your family history, which of the following best describes the geographic regions where your ancestors (i.e. your great-great-grandparents) come from? You may select as many choices as you need. |  |
|------|------------------------------------------------------------------------------------------------------------------------------------------------------------------------------------------------------------------------------------|--|



|              |                                                                                                         |           |
|--------------|---------------------------------------------------------------------------------------------------------|-----------|
| Q460_1       | England, Ireland, Scotland or Wales                                                                     | Yes.....1 |
| Q460_2       | Australia - not of Aboriginal or Torres Strait Islander descent                                         | Yes.....1 |
| Q460_3       | Australia - of Aboriginal or Torres Strait Islander descent                                             | Yes.....1 |
| Q460_4       | New Zealand - not of Maori descent                                                                      | Yes.....1 |
| Q460_5       | New Zealand - of Maori descent                                                                          | Yes.....1 |
| Q460_5       | Northern Europe including Sweden, Norway, Finland<br>and surrounding countries                          | Yes.....1 |
| Q460_7       | Western Europe including France, Germany, the Netherlands<br>and surrounding countries                  | Yes.....1 |
| Q460_8       | Southern Europe including Italy, Greece, Spain, Portugal<br>and surrounding countries                   | Yes.....1 |
| Q460_9       | Eastern Europe including Russia, Poland, Hungary<br>and surrounding countries                           | Yes.....1 |
| Q460_10      | Middle East including Lebanon, Turkey<br>and surrounding countries                                      | Yes.....1 |
| Q460_11      | Eastern Asia including China, Japn, South Korea,<br>North Korea, Taiwan and Hong Kong                   | Yes.....1 |
| Q460_12      | South-East Asia including Thailand, Malaysia, Indonesia,<br>Singapore and surrounding countries         | Yes.....1 |
| Q460_13      | South Asia including India, Pakistan, Sri Lanka<br>and surrounding countries                            | Yes.....1 |
| Q460_14      | Polynesia, Micronesia or Melanesia including Tonga,<br>Fiji, Papua New Guinea and surrounding countries | Yes.....1 |
| Q460_15      | Africa                                                                                                  | Yes.....1 |
| Q460_16      | North America - not of First Nations, Native American,<br>Inuit or Métis descent                        | Yes.....1 |
| Q460_17      | North America - of First Nations, Native American,<br>Inuit or Métis descent                            | Yes.....1 |
| Q460_18      | Caribbean, Central or South America                                                                     | Yes.....1 |
| Q460_19      | Don't know                                                                                              | Yes.....1 |
| Q460_20      | Other                                                                                                   | Yes.....1 |
| Q460_20_TEXT | Specify                                                                                                 | .....1    |

## Module 1b – Anxiety Disorders

\*\*\*\*\*

IF Q103= 2 AND Q103 = EITHER (2, 3, 4, or 5) CONTINUE.  
OTHERWISE GO TO Q463

\*\*\*\*\*

Q462 You mentioned earlier in the questionnaire that you have had at least one period lasting one month or longer when most of the time you felt worried, tense or anxious.

\*\*\*\*\*

GO TO Q105\_n

\*\*\*\*\*

\*\*\*\*\*

IF Q103= 1 AND Q104 = 2 AND Q103 = EITHER (2, 3, 4, or 5) CONTINUE.  
OTHERWISE GO TO Q464 SKIP BOX

\*\*\*\*\*

Q463 You mentioned earlier that you have had a time when you worried a lot more than most people would in your situation.

Q105\_n How old were you when this kind of worrying started? \_\_\_/\_\_\_ YEARS  
*Please put your age in years. An approximate age is fine.*

Q106\_n How old were you when you most recently experienced this kind of worrying? Please put your age in years. An approximate age is fine. \_\_\_/\_\_\_ YEARS

Q108 Please think of the period in your life when you have felt the most worried, tense, or anxious. This could be in the past, or it could be continuing now.

Q109 During that period, do you think you worried much more than other people would? No .....1  
Yes .....2

Q110 Did you worry most days? No .....1  
Yes .....2

Q111 Did you usually worry about one particular thing, such as your job security or the failing health of a loved one, or more than one thing? One thing .....1  
More than one thing .....2

Q112 Did you find it difficult to stop worrying? No .....1  
Yes .....2

Q113 Did you ever have different worries on your mind at the same time? No .....1  
Yes .....2

|      |                                                                                                            |                                                                   |
|------|------------------------------------------------------------------------------------------------------------|-------------------------------------------------------------------|
| Q114 | How often was your worry so strong that you couldn't put it out of your mind no matter how hard you tried? | Often .....1<br>Sometimes .....2<br>Rarely .....3<br>Never .....4 |
|------|------------------------------------------------------------------------------------------------------------|-------------------------------------------------------------------|

|      |                                                            |                                                                   |
|------|------------------------------------------------------------|-------------------------------------------------------------------|
| Q115 | How often did you find it difficult to control your worry? | Often .....1<br>Sometimes .....2<br>Rarely .....3<br>Never .....4 |
|------|------------------------------------------------------------|-------------------------------------------------------------------|

Q116 When you were worried or anxious, were you also:

|        |           |                         |
|--------|-----------|-------------------------|
| Q116_1 | Restless? | No .....1<br>Yes .....2 |
|--------|-----------|-------------------------|

|        |                      |                         |
|--------|----------------------|-------------------------|
| Q116_2 | Keyed up or on edge? | No .....1<br>Yes .....2 |
|--------|----------------------|-------------------------|

|        |               |                         |
|--------|---------------|-------------------------|
| Q116_3 | Easily tired? | No .....1<br>Yes .....2 |
|--------|---------------|-------------------------|

|        |                                                             |                         |
|--------|-------------------------------------------------------------|-------------------------|
| Q116_4 | Having difficulty keeping your mind on what you were doing? | No .....1<br>Yes .....2 |
|--------|-------------------------------------------------------------|-------------------------|

|        |                            |                         |
|--------|----------------------------|-------------------------|
| Q116_5 | More irritable than usual? | No .....1<br>Yes .....2 |
|--------|----------------------------|-------------------------|

|        |                                        |                         |
|--------|----------------------------------------|-------------------------|
| Q116_6 | Having tense, sore, or aching muscles? | No .....1<br>Yes .....2 |
|--------|----------------------------------------|-------------------------|

|        |                                                 |                         |
|--------|-------------------------------------------------|-------------------------|
| Q116_7 | Often having trouble falling or staying asleep? | No .....1<br>Yes .....2 |
|--------|-------------------------------------------------|-------------------------|

|      |                                                                                                                                                                |                         |
|------|----------------------------------------------------------------------------------------------------------------------------------------------------------------|-------------------------|
| Q117 | Did you ever tell a professional about these problems (medical doctor, psychologist, social worker, counsellor, nurse, clergy, or other helping professional)? | No .....1<br>Yes .....2 |
|------|----------------------------------------------------------------------------------------------------------------------------------------------------------------|-------------------------|

|      |                                                                           |                                                                     |
|------|---------------------------------------------------------------------------|---------------------------------------------------------------------|
| Q118 | How much did the worry or anxiety interfere with your life or activities? | A lot .....1<br>Some .....2<br>A little .....3<br>Not at all .....4 |
|------|---------------------------------------------------------------------------|---------------------------------------------------------------------|

\*\*\*\*\*  
IF EVER HAD ANY OF THESE (Q119\_1, Q119\_2, Q119\_3 OR Q119\_4 = 2) AND ALWAYS OR ALMOST ALWAYS (Q121 = 1 OR 2) THEN CONTINUE.  
ELSE GO TO Q465.  
\*\*\*\*\*

\*\*\*\*\*  
ITEMS DISPLAYED ONLY WHEN ENDORSED (Q119\_1, Q119\_2, Q119\_3 OR Q119\_4 = 2)  
\*\*\*\*\*

Q464 You mentioned earlier in the questionnaire that you have (or have had) a strong fear of the following:

Environment (e.g. heights, storms, thunder, lightning, or being in still water, like a swimming pool or lake?)  
 Situations (e.g. being in an airplane, elevator, or a closed space like a cave or tunnel)?  
 Animals (e.g. snakes, birds, rats, insects, dogs, or other animals)?  
 Blood, injections or injury (e.g. blood, needles, medical procedures?)

**Q122\_n** How old were you when these fears started? \_\_/\_\_/\_\_ YEARS  
 Please put your age in years. An approximate age is fine.

**Q123\_n** How old were you when you most recently experienced these fears? Please put your age in years. An approximate age is fine. \_\_/\_\_/\_\_ YEARS

**Q124** How long was the longest time any of these fears lasted?

|  |                                         |        |
|--|-----------------------------------------|--------|
|  | Less than 6 months                      | .....1 |
|  | Between 6 and 12 months                 | .....2 |
|  | Between 1 and 5 years                   | .....3 |
|  | More than 5 years                       | .....4 |
|  | All my life / As long as I can remember | .....5 |

**Q125** How much have any of these fears ever interfered with your life or activities?

|  |            |        |
|--|------------|--------|
|  | A lot      | .....1 |
|  | Some       | .....2 |
|  | A little   | .....3 |
|  | Not at all | .....4 |

**Q126** Are (or were) any of these fears out of proportion to the actual danger involved?

|  |     |        |
|--|-----|--------|
|  | No  | .....1 |
|  | Yes | .....2 |

\*\*\*\*\*

IF EVER HAD EITHER (Q127\_1 OR Q127\_2 = 2) AND  
 IF ALWAYS OR ALMOST ALWAYS (Q129 = 1 OR 2) THEN CONTINUE  
 ELSE GO TO Q466.

\*\*\*\*\*

\*\*\*\*\*

ITEMS DISPLAYED ONLY WHEN ENDORSED (Q127\_1 OR Q127\_2 = 2)

\*\*\*\*\*

**Q465** You mentioned earlier in the questionnaire that you have had a strong fear of, or have been extremely anxious about, the following situations (either now or in the past):

Being in social situations (e.g. talking with and meeting unfamiliar people)  
 Being observed (e.g. eating or drinking while others are watching, talking in front of others)

**Q130** Do you (or did you) ...

**Q130\_1** ... avoid social situations?

|  |     |        |
|--|-----|--------|
|  | No  | .....1 |
|  | Yes | .....2 |

**Q130\_2** ... endure them with intense anxiety?

|  |     |        |
|--|-----|--------|
|  | No  | .....1 |
|  | Yes | .....2 |

|        |                                                                                                                                                                                                      |                                                                                                                                                                           |
|--------|------------------------------------------------------------------------------------------------------------------------------------------------------------------------------------------------------|---------------------------------------------------------------------------------------------------------------------------------------------------------------------------|
| Q131   | Is (or was) your fear or anxiety in social situations out of proportion to the actual threat posed by the situations?                                                                                | No .....1<br>Yes .....2                                                                                                                                                   |
| Q132_n | How old were you when these fears or anxieties about social situations started? Please put your age in years. An approximate age is fine.                                                            | __/_ YEARS                                                                                                                                                                |
| Q133_n | How old were you when you most recently experienced these fears or anxieties about social situations? Please put your age in years. An approximate age is fine.                                      | __/_ YEARS                                                                                                                                                                |
| Q134   | How long was the longest time these fears or anxieties about social situations lasted?                                                                                                               | Less than 6 months .....1<br>Between 6 and 12 months .....2<br>Between 1 and 5 years .....3<br>More than 5 years .....4<br>All my life / As long as I can remember .....5 |
| Q135   | How much does (or did) your fear, anxiety or avoidance of social situations upset or bother you?                                                                                                     | A lot .....1<br>Some .....2<br>A little .....3<br>Not at all .....4                                                                                                       |
| Q136   | How much does (or did) your fear, anxiety or avoidance of social situations interfere with your ability to do your job, have a social life, or interfere with any other important area of your life? | A lot .....1<br>Some .....2<br>A little .....3<br>Not at all .....4                                                                                                       |

\*\*\*\*\*

IF EVER HAD ANY OF THESE  
(Q137\_1, Q137\_2, Q137\_3, Q137\_4 OR Q137\_5 = 2) AND  
IF ALWAYS OR ALMOST ALWAYS (Q139 = 1 OR 2) THEN CONTINUE.  
ELSE GO TO Q467.

\*\*\*\*\*

\*\*\*\*\*  
ITEMS DISPLAYED ONLY WHEN ENDORSED (Q137\_1, Q137\_2, Q137\_3, Q137\_4 OR Q137\_5 = 2)  
\*\*\*\*\*

Q465 Earlier in the questionnaire, you mentioned that you have (or have previously had) a strong fear of the following:

Using public transportation (e.g. cars, buses, trains, ships, planes)  
Being in open spaces (e.g. parking lots, marketplaces, bridges)  
Being in enclosed spaces (e.g. shops, theatres, cinemas)  
Standing in line or being in a crowd  
Being outside of the home alone

|      |                                                                                                                                         |                         |
|------|-----------------------------------------------------------------------------------------------------------------------------------------|-------------------------|
| Q140 | In one or more of these situations, are (were) you ever afraid that you might faint, lose control, or embarrass yourself in other ways? | No .....1<br>Yes .....2 |
|------|-----------------------------------------------------------------------------------------------------------------------------------------|-------------------------|

\*\*\*\*\*

IF YES (Q140 = 2) THEN CONTINUE, ELSE GO TO Q143

\*\*\*\*\*

|        |                                                                                                                                   |                                                                                                                                                                           |
|--------|-----------------------------------------------------------------------------------------------------------------------------------|---------------------------------------------------------------------------------------------------------------------------------------------------------------------------|
| Q141   | Are (were) you afraid that escape might be difficult if that happened?                                                            | No .....1<br>Yes .....2                                                                                                                                                   |
| Q142   | Are (were) you afraid that help might not be available if you needed it?                                                          | No .....1<br>Yes .....2                                                                                                                                                   |
| Q143_n | How old were you when these fears started? Please put your age in years. An approximate age is fine.                              | ___/___ YEARS                                                                                                                                                             |
| Q144_n | How old were you when you most recently experienced any of these fears? Please put your age in years. An approximate age is fine. | ___/___ YEARS                                                                                                                                                             |
| Q145   | How long was the longest time any of these fears lasted?                                                                          | Less than 6 months .....1<br>Between 6 and 12 months .....2<br>Between 1 and 5 years .....3<br>More than 5 years .....4<br>All my life / As long as I can remember .....5 |
| Q146   | How much have any of these fears ever interfered with your life or activities?                                                    | A lot .....1<br>Some .....2<br>A little .....3<br>Not at all .....4                                                                                                       |

\*\*\*\*\*  
IF LESS THAN 4 SYMPTOMS (Q147\_1 TO Q147\_13) GO TO MODULE 2,  
ELSE CONTINUE.

\*\*\*\*\*  
\*\*\*\*\*  
ITEMS DISPLAYED ONLY WHEN ENDORSED (Q147\_1 TO Q147\_13)  
\*\*\*\*\*

|      |                                                                                                                                                                                                                                                                                                                                                                                                                                                                                                                                                                                                                                                                                                                                                                                                                 |
|------|-----------------------------------------------------------------------------------------------------------------------------------------------------------------------------------------------------------------------------------------------------------------------------------------------------------------------------------------------------------------------------------------------------------------------------------------------------------------------------------------------------------------------------------------------------------------------------------------------------------------------------------------------------------------------------------------------------------------------------------------------------------------------------------------------------------------|
| Q467 | You mentioned earlier in the questionnaire that you have previously had at least one panic attack (a sudden, unexpected surge of intense fear or intense discomfort). You said that your symptoms included:<br><br>Your heart was pounding or racing<br>You were sweating<br>You were trembling or shaking<br>You felt short of breath, or like you were being smothered<br>You felt like you were choking<br>You had pain or discomfort in your chest<br>You were nauseous or felt sick in the stomach<br>You felt dizzy, unsteady, light-headed or faint<br>You felt hot or cold<br>You felt numbness or tingling sensations<br>It felt like things weren't real, or you felt detached from yourself<br>You were afraid you were going to lose control or "go crazy"<br>You were afraid you were going to die |
|------|-----------------------------------------------------------------------------------------------------------------------------------------------------------------------------------------------------------------------------------------------------------------------------------------------------------------------------------------------------------------------------------------------------------------------------------------------------------------------------------------------------------------------------------------------------------------------------------------------------------------------------------------------------------------------------------------------------------------------------------------------------------------------------------------------------------------|

Q148 How many such attacks of fear or panic would you say that you have had over the course of your lifetime?   /  /   ATTACKS

---

Q149 After any of your attacks of fear or panic, did you ever ...

Q149\_1 ... feel anxious, worried or nervous about having more panic attacks? No .....1  
Yes .....2

Q149\_2 ... feel worried about losing control, having a heart attack, going crazy, or other bad things happening because of panic attacks? No .....1  
Yes .....2

Q149\_3 ... avoid situations in which panic attacks might occur? No .....1  
Yes .....2

\*\*\*\*\*  
IF EVER ANY OF THESE (Q149\_1, Q149\_2 OR Q149\_3 = 2) THEN CONTINUE.  
ELSE GO TO Q151  
\*\*\*\*\*

---

Q150 How long did you continue to worry about panic attacks or their consequences, or avoid situations in which panic attacks might occur? Less than 1 month .....1  
Between 1 and 6 months .....2  
Between 6 and 12 months .....3  
More than 12 months .....4

---

Q151 Were these attacks or sudden periods of physical discomfort ever the result of a medical condition (e.g. a heart attack) or from using medication, drugs or alcohol? No, never .....1  
Yes, some of them .....2  
Yes, all of them .....3

---

Q152 We already asked about specific situations that cause strong fears (heights, elevators, snakes etc). When you have sudden anxiety attacks, do they usually occur in specific situations that cause you strong fear? No .....1  
Yes .....2

---

Q153 Did you ever have an attack when you were not in a situation that usually causes you to have strong fears? No .....1  
Yes .....2

---

Q154\_n How old were you the first time you had one of these sudden attacks of feeling frightened, anxious or panicky?   /   YEARS

---

Q155\_n How old were you the last time you had one of these sudden attacks of feeling frightened, anxious or panicky?   /   YEARS

---

## Module 12 – General and Physical Health

Q30 On a scale from 1 to 5 where 1 star is very poor and 5 stars is excellent, how would you rate your current overall physical health and mental health?

Q30\_1 Physical health \_\_ STARS

Q30\_2 Mental health \_\_ STARS

Q31 Over the past few weeks have you been troubled by....

Q31\_1 Feeling nervous or tense? Never or some of the time .....1  
A good part of the time .....2  
Most of the time .....3

Q31\_2 Feeling unhappy and depressed? Never or some of the time .....1  
A good part of the time .....2  
Most of the time .....3

Q31\_3 Feeling constantly under strain? Never or some of the time .....1  
A good part of the time .....2  
Most of the time .....3

Q31\_4 Everything getting on top of you? Never or some of the time .....1  
A good part of the time .....2  
Most of the time .....3

Q31\_5 Losing confidence? Never or some of the time .....1  
A good part of the time .....2  
Most of the time .....3

Q31\_6 Being unable to overcome difficulties? Never or some of the time .....1  
A good part of the time .....2  
Most of the time .....3

Q31\_7 Muscle pain after activity? Never or some of the time .....1  
A good part of the time .....2  
Most of the time .....3

Q31\_8 Needing to sleep longer? Never or some of the time .....1  
A good part of the time .....2  
Most of the time .....3

Q31\_9 Prolonged tiredness after activity? Never or some of the time .....1  
A good part of the time .....2  
Most of the time .....3

Q31\_10 Poor sleep? Never or some of the time .....1  
A good part of the time .....2  
Most of the time .....3

Q31\_11 Poor concentration? Never or some of the time .....1  
A good part of the time .....2  
Most of the time .....3

Q31\_12 Tired muscles after activity? Never or some of the time .....1  
A good part of the time .....2  
Most of the time .....3



|        |                                                         |                                                                                                                                        |
|--------|---------------------------------------------------------|----------------------------------------------------------------------------------------------------------------------------------------|
| Q32    | In the past four weeks, about how often did you feel... |                                                                                                                                        |
| Q32_1  | Tired out for no good reason?                           | None of the time .....1<br>A little of the time .....2<br>Some of the time .....3<br>Most of the time .....4<br>All of the time .....5 |
| Q32_2  | Nervous?                                                | None of the time .....1<br>A little of the time .....2<br>Some of the time .....3<br>Most of the time .....4<br>All of the time .....5 |
| Q32_3  | So nervous that nothing could calm you down?            | None of the time .....1<br>A little of the time .....2<br>Some of the time .....3<br>Most of the time .....4<br>All of the time .....5 |
| Q32_4  | Hopeless?                                               | None of the time .....1<br>A little of the time .....2<br>Some of the time .....3<br>Most of the time .....4<br>All of the time .....5 |
| Q32_5  | Restless or fidgety?                                    | None of the time .....1<br>A little of the time .....2<br>Some of the time .....3<br>Most of the time .....4<br>All of the time .....5 |
| Q32_6  | So restless you could not sit still?                    | None of the time .....1<br>A little of the time .....2<br>Some of the time .....3<br>Most of the time .....4<br>All of the time .....5 |
| Q32_7  | Depressed?                                              | None of the time .....1<br>A little of the time .....2<br>Some of the time .....3<br>Most of the time .....4<br>All of the time .....5 |
| Q32_8  | That everything was an effort?                          | None of the time .....1<br>A little of the time .....2<br>Some of the time .....3<br>Most of the time .....4<br>All of the time .....5 |
| Q32_9  | So sad that nothing could cheer you up?                 | None of the time .....1<br>A little of the time .....2<br>Some of the time .....3<br>Most of the time .....4<br>All of the time .....5 |
| Q32_10 | Worthless?                                              | None of the time .....1<br>A little of the time .....2<br>Some of the time .....3<br>Most of the time .....4<br>All of the time .....5 |

---

Q33 Over the past four weeks, how many days in total were you \_\_\_\_\_ /\_\_ DAYS  
unable to carry out your usual daily activities fully? Don't know .....99

---

Q34 Over the past four weeks, how many days in total did you \_\_\_\_\_ /\_\_ DAYS  
stay in bed all or most of the day because of illness or injury? Don't know .....99

---

Q461 Great work! You have finished this part of the questionnaire!

---

**Module 2 – Alcohol, tobacco and other substances**

|        |                                                                 |                         |
|--------|-----------------------------------------------------------------|-------------------------|
| Q165   | In your life, have you ever...                                  |                         |
| Q165_1 | Consumed alcoholic beverages (beer, wine or spirits)?           | No .....1<br>Yes .....2 |
| Q165_2 | Used tobacco products (cigarettes, chewing tobacco, or cigars)? | No .....1<br>Yes .....2 |
| Q165_3 | Used cannabis (marijuana)?                                      | No .....1<br>Yes .....2 |

\*\*\*\*\*  
 IF EVER USED TOBACCO (Q165\_2 = 2) CONTINUE, ELSE GO TO Q168  
 \*\*\*\*\*

|      |                                                              |                         |
|------|--------------------------------------------------------------|-------------------------|
| Q166 | Have you smoked at least 100 cigarettes in your entire life? | No .....1<br>Yes .....2 |
|------|--------------------------------------------------------------|-------------------------|

\*\*\*\*\*  
 IF 100 CIGARETTES OR MORE IN LIFETIME (Q166 = 2) GO TO Q168  
 ELSE CONTINUE  
 \*\*\*\*\*

|      |                                                                                                 |                         |
|------|-------------------------------------------------------------------------------------------------|-------------------------|
| Q167 | Have you smoked pipes, cigars, or other tobacco products at least 20 times in your entire life? | No .....1<br>Yes .....2 |
|------|-------------------------------------------------------------------------------------------------|-------------------------|

|      |                                                                                                                                                                                                                                                              |                         |
|------|--------------------------------------------------------------------------------------------------------------------------------------------------------------------------------------------------------------------------------------------------------------|-------------------------|
| Q168 | E-cigarettes (also called electronic cigarettes) are battery-operated devices that heat a liquid to produce a vapour that users inhale. "Smoking" an e-cigarette mimics the act of smoking, and is often called "vaping". Have you ever used an e-cigarette? | No .....1<br>Yes .....2 |
|------|--------------------------------------------------------------------------------------------------------------------------------------------------------------------------------------------------------------------------------------------------------------|-------------------------|

\*\*\*\*\*  
 IF NEVER USED E-CIGARETTE (Q168 = 1) GO TO Q171, ELSE CONTINUE  
 \*\*\*\*\*

|      |                                                                                                                                                |                                              |
|------|------------------------------------------------------------------------------------------------------------------------------------------------|----------------------------------------------|
| Q169 | Some liquids for use in e-cigarettes contain nicotine, while others don't. Have you used an e-cigarette with a liquid that contained nicotine? | No .....1<br>Yes .....2<br>Don't know .....3 |
|------|------------------------------------------------------------------------------------------------------------------------------------------------|----------------------------------------------|

|      |                                                           |                                                                                                                                                           |
|------|-----------------------------------------------------------|-----------------------------------------------------------------------------------------------------------------------------------------------------------|
| Q170 | How many times in your life have you used an e-cigarette? | Fewer than 5 times .....1<br>Between 5 and 9 times .....2<br>Between 10 and 19 times .....3<br>Between 20 and 99 times .....4<br>100 times or more .....5 |
|------|-----------------------------------------------------------|-----------------------------------------------------------------------------------------------------------------------------------------------------------|

\*\*\*\*\*  
 IF EVER USED CANNABIS (Q165\_3 = 2) CONTINUE, ELSE GO TO Q172  
 \*\*\*\*\*

|              |                                                                                                                                                                                                   |                                                                                                                        |
|--------------|---------------------------------------------------------------------------------------------------------------------------------------------------------------------------------------------------|------------------------------------------------------------------------------------------------------------------------|
| Q171         | How many times in your life have you used cannabis (marijuana)?                                                                                                                                   | Fewer than 5 times .....1<br>Between 5 and 9 times .....2<br>Between 10 and 19 times .....3<br>20 times or more .....4 |
| <hr/>        |                                                                                                                                                                                                   |                                                                                                                        |
| Q172         | In your life, which of the following substances have you ever used? Non-medical use only: do not include items that were taken in the quantities and manner prescribed by a medical professional. |                                                                                                                        |
| Q172_1       | Cocaine                                                                                                                                                                                           | No .....1<br>Yes .....2                                                                                                |
| Q172_2       | Amphetamine type stimulants (e.g. ice, speed)                                                                                                                                                     | No .....1<br>Yes .....2                                                                                                |
| Q172_3       | Inhalants (e.g. glue, petrol, paint thinner, nitrous oxide)                                                                                                                                       | No .....1<br>Yes .....2                                                                                                |
| Q172_4       | Sedatives or sleeping pills (e.g. Valium, Serepax, Rohypnol)                                                                                                                                      | No .....1<br>Yes .....2                                                                                                |
| Q172_5       | Hallucinogens (e.g. LSD, acid, mushrooms, PCP)                                                                                                                                                    | No .....1<br>Yes .....2                                                                                                |
| Q172_6       | Opioids (e.g. heroin, morphine, methadone)                                                                                                                                                        | No .....1<br>Yes .....2                                                                                                |
| Q172_7       | Ecstasy (E, MDMA)                                                                                                                                                                                 | No .....1<br>Yes .....2                                                                                                |
| Q172_8       | Ketamine (Special K)                                                                                                                                                                              | No .....1<br>Yes .....2                                                                                                |
| Q172_9       | GHB (liquid e, Fantasy)                                                                                                                                                                           | No .....1<br>Yes .....2                                                                                                |
| Q172_10      | Other party drugs                                                                                                                                                                                 | No .....1<br>Yes .....2                                                                                                |
| Q172_11      | Over-the-counter or prescription pain killers and analgesics (e.g. cough medicine, Mersyndol, Panadeine, codeine, hydrocodone)                                                                    | No .....1<br>Yes .....2                                                                                                |
| Q172_12      | Over-the-counter or prescription stimulants (e.g. No-do, pseudoephedrine, dexamphetamine, Ritalin, diet pills)                                                                                    | No .....1<br>Yes .....2                                                                                                |
| Q172_13      | Other (specify):                                                                                                                                                                                  | No .....1<br>Yes .....2                                                                                                |
| Q172_13_TEXT | Specified other substance                                                                                                                                                                         | _____                                                                                                                  |

\*\*\*\*\*  
 FOR EACH SUBSTANCE SELECTED AT Q172, COMPLETE Q173  
 IF NO SUBSTANCE SELECTED AT Q172, GO TO Q175  
 \*\*\*\*\*

|         |                                                                                                                                                                                                               |                         |
|---------|---------------------------------------------------------------------------------------------------------------------------------------------------------------------------------------------------------------|-------------------------|
| Q173    | In your life, which of the following substances have you used 10 or more times? Non-medical use only: do not include items that were taken in the quantities and manner prescribed by a medical professional. |                         |
| Q173_1  | Cocaine                                                                                                                                                                                                       | No .....1<br>Yes .....2 |
| Q173_2  | Amphetamine type stimulants (e.g. ice, speed)                                                                                                                                                                 | No .....1<br>Yes .....2 |
| Q173_3  | Inhalants (e.g. glue, petrol, paint thinner, nitrous oxide)                                                                                                                                                   | No .....1<br>Yes .....2 |
| Q173_4  | Sedatives or sleeping pills (e.g. Valium, Serepax, Rohypnol)                                                                                                                                                  | No .....1<br>Yes .....2 |
| Q173_5  | Hallucinogens (e.g. LSD, acid, mushrooms, PCP)                                                                                                                                                                | No .....1<br>Yes .....2 |
| Q173_6  | Opioids (e.g. heroin, morphine, methadone)                                                                                                                                                                    | No .....1<br>Yes .....2 |
| Q173_7  | Ecstasy (E, MDMA)                                                                                                                                                                                             | No .....1<br>Yes .....2 |
| Q173_8  | Ketamine (Special K)                                                                                                                                                                                          | No .....1<br>Yes .....2 |
| Q173_9  | GHB (liquid e, Fantasy)                                                                                                                                                                                       | No .....1<br>Yes .....2 |
| Q173_10 | Other party drugs                                                                                                                                                                                             | No .....1<br>Yes .....2 |
| Q173_11 | Over-the-counter or prescription pain killers and analgesics (e.g. cough medicine, Mersyndol, Panadeine, codeine, hydrocodone)                                                                                | No .....1<br>Yes .....2 |
| Q173_12 | Over-the-counter or prescription stimulants (e.g. No-doz, pseudoephedrine, dexamphetamine, Ritalin, diet pills)                                                                                               | No .....1<br>Yes .....2 |
| Q173_13 | Other                                                                                                                                                                                                         | No .....1<br>Yes .....2 |

\*\*\*\*\*  
 IF EVER CONSUMED ALCOHOL (Q165\_1 = 2),  
 COMPLETE Q174 FOR EACH SUBSTANCE SELECTED AT Q172  
 ELSE GO TO Q175  
 \*\*\*\*\*

|          |                                                                                                                                |                         |
|----------|--------------------------------------------------------------------------------------------------------------------------------|-------------------------|
| Q174     | In your life, which of the following substances have you ever used while drinking alcohol?                                     |                         |
| Q174_x1  | Cocaine                                                                                                                        | No .....1<br>Yes .....2 |
| Q174_x2  | Amphetamine type stimulants (e.g. ice, speed)                                                                                  | No .....1<br>Yes .....2 |
| Q174_x3  | Inhalants (e.g. glue, petrol, paint thinner, nitrous oxide)                                                                    | No .....1<br>Yes .....2 |
| Q174_x4  | Sedatives or sleeping pills (e.g. Valium, Serepax, Rohypnol)                                                                   | No .....1<br>Yes .....2 |
| Q174_x5  | Hallucinogens (e.g. LSD, acid, mushrooms, PCP)                                                                                 | No .....1<br>Yes .....2 |
| Q174_x6  | Opioids (e.g. heroin, morphine, methadone)                                                                                     | No .....1<br>Yes .....2 |
| Q174_x7  | Ecstasy (E, MDMA)                                                                                                              | No .....1<br>Yes .....2 |
| Q174_x8  | Ketamine (Special K)                                                                                                           | No .....1<br>Yes .....2 |
| Q174_x9  | GHB (liquid e, Fantasy)                                                                                                        | No .....1<br>Yes .....2 |
| Q174_x10 | Other party drugs                                                                                                              | No .....1<br>Yes .....2 |
| Q174_x11 | Over-the-counter or prescription pain killers and analgesics (e.g. cough medicine, Mersyndol, Panadeine, codeine, hydrocodone) | No .....1<br>Yes .....2 |
| Q174_x12 | Over-the-counter or prescription stimulants (e.g. No-doz, pseudoephedrine, dexamphetamine, Ritalin, diet pills)                | No .....1<br>Yes .....2 |
| Q174_x13 | Other                                                                                                                          | No .....1<br>Yes .....2 |

\*\*\*\*\*  
 FOR EACH SUBSTANCE SELECTED AT Q165, Q168 AND Q172,  
 COMPLETE Q175  
 IF NO SUBSTANCES SELECTED AT ANY OF Q165, Q168 OR Q172,  
 GO TO Q201  
 \*\*\*\*\*

|          |                                                                                                                                                                               |               |
|----------|-------------------------------------------------------------------------------------------------------------------------------------------------------------------------------|---------------|
| Q175     | At what age did you first use these substances? Non-medical use only: do not include items that were taken in the quantities and manner prescribed by a medical professional. |               |
| Q175_1   | Alcohol (beer, wine, spirits)                                                                                                                                                 | ___/___ YEARS |
| Q175_2   | Tobacco products (e.g cigarettes, chewing tobacco, cigars)                                                                                                                    | ___/___ YEARS |
| Q175_3   | E-cigarettes                                                                                                                                                                  | ___/___ YEARS |
| Q175_4   | Cannabis (marijuana)                                                                                                                                                          | ___/___ YEARS |
| Q175_x1  | Cocaine                                                                                                                                                                       | ___/___ YEARS |
| Q175_x2  | Amphetamine-type stimulants (e.g. ice, speed)                                                                                                                                 | ___/___ YEARS |
| Q175_x3  | Inhalants (e.g. glue, petrol, paint thinner, nitrous oxide)                                                                                                                   | ___/___ YEARS |
| Q175_x4  | Sedatives or sleeping pills (e.g. Valium, Serepax, Rohypnol)                                                                                                                  | ___/___ YEARS |
| Q175_x5  | Hallucinogens (e.g. LSD, acid, mushrooms, PCP)                                                                                                                                | ___/___ YEARS |
| Q175_x6  | Opioids (e.g. heroin, morphine, methadone)                                                                                                                                    | ___/___ YEARS |
| Q175_x7  | Ecstasy (E, MDMA)                                                                                                                                                             | ___/___ YEARS |
| Q175_x8  | Ketamine (Special K)                                                                                                                                                          | ___/___ YEARS |
| Q175_x9  | GHB (liquid e, Fantasy)                                                                                                                                                       | ___/___ YEARS |
| Q175_x10 | Other party drugs                                                                                                                                                             | ___/___ YEARS |
| Q175_x11 | Over-the-counter or prescription pain killers and analgesics (e.g. cough medicine, Mersyndol, Panadeine, codeine, hydrocodone)                                                | ___/___ YEARS |
| Q175_x12 | Over-the-counter or prescription stimulants (e.g. No-do, pseudoephedrine, dexamphetamine, Ritalin, diet pills)                                                                | ___/___ YEARS |
| Q175_x13 | Other                                                                                                                                                                         | ___/___ YEARS |

\*\*\*\*\*  
 IF NEVER CONSUMED ALCOHOL (Q165\_1 = 1) GO TO Q182  
 ELSE CONTINUE  
 \*\*\*\*\*

Q176 Please refer to the following standard drink guides for the next two questions.

Q177

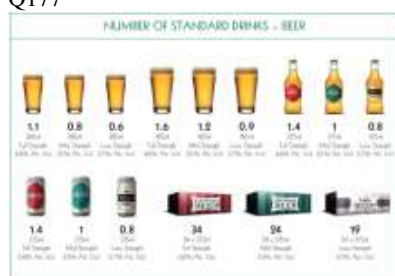

Q178

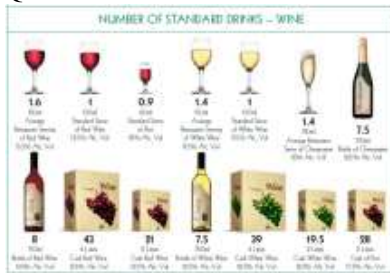

Q179

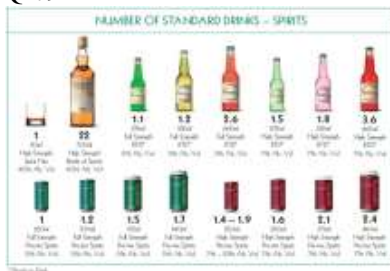

Q180

In the past three months, how many times have you had three or more standard drinks in a day?

\_\_\_/\_\_\_ TIMES

Q181

In the past three months, how many times have you had five or more standard drinks in a day?

\_\_\_/\_\_\_ TIMES

\*\*\*\*\*  
 FOR EACH SUBSTANCE SELECTED AT Q165B, Q165D, Q168 AND Q172,  
 COMPLETE Q182  
 IF NO SUBSTANCES SELECTED AT ANY OF Q165B, Q165D, Q168 OR Q172,  
 GO TO Q183  
 \*\*\*\*\*



|         |                                                                                                                                                                                                   |                                                                                                         |
|---------|---------------------------------------------------------------------------------------------------------------------------------------------------------------------------------------------------|---------------------------------------------------------------------------------------------------------|
| Q182    | In the past three months, how often have you used these substances? Non-medical use only: do not include items that were taken in the quantities and manner prescribed by a medical professional. |                                                                                                         |
| Q182_1  | Tobacco products (e.g cigarettes, chewing tobacco, cigars)                                                                                                                                        | Never .....1<br>Once or twice .....2<br>Monthly .....3<br>Weekly .....4<br>Daily or almost daily .....5 |
| Q182_2  | E-cigarettes                                                                                                                                                                                      | Never .....1<br>Once or twice .....2<br>Monthly .....3<br>Weekly .....4<br>Daily or almost daily .....5 |
| Q182_3  | Cannabis (marijuana)                                                                                                                                                                              | Never .....1<br>Once or twice .....2<br>Monthly .....3<br>Weekly .....4<br>Daily or almost daily .....5 |
| Q182_x1 | Cocaine                                                                                                                                                                                           | Never .....1<br>Once or twice .....2<br>Monthly .....3<br>Weekly .....4<br>Daily or almost daily .....5 |
| Q182_x2 | Amphetamine-type stimulants (e.g. ice, speed)                                                                                                                                                     | Never .....1<br>Once or twice .....2<br>Monthly .....3<br>Weekly .....4<br>Daily or almost daily .....5 |
| Q182_x3 | Inhalants (e.g. glue, petrol, paint thinner, nitrous oxide)                                                                                                                                       | Never .....1<br>Once or twice .....2<br>Monthly .....3<br>Weekly .....4<br>Daily or almost daily .....5 |
| Q182_x4 | Sedatives or sleeping pills (e.g. Valium, Serepax, Rohypnol)                                                                                                                                      | Never .....1<br>Once or twice .....2<br>Monthly .....3<br>Weekly .....4<br>Daily or almost daily .....5 |
| Q182_x5 | Hallucinogens (e.g. LSD, acid, mushrooms, PCP)                                                                                                                                                    | Never .....1<br>Once or twice .....2<br>Monthly .....3<br>Weekly .....4<br>Daily or almost daily .....5 |
| Q182_x6 | Opioids (e.g. heroin, morphine, methadone)                                                                                                                                                        | Never .....1<br>Once or twice .....2<br>Monthly .....3<br>Weekly .....4<br>Daily or almost daily .....5 |
| Q182_x7 | Ecstasy (E, MDMA)                                                                                                                                                                                 | Never .....1<br>Once or twice .....2<br>Monthly .....3<br>Weekly .....4                                 |

|          |                                                                                                                                      |                                                                                                         |
|----------|--------------------------------------------------------------------------------------------------------------------------------------|---------------------------------------------------------------------------------------------------------|
|          |                                                                                                                                      | Daily or almost daily .....5                                                                            |
| Q182_x8  | Ketamine (Special K)                                                                                                                 | Never .....1<br>Once or twice .....2<br>Monthly .....3<br>Weekly .....4<br>Daily or almost daily .....5 |
| Q182_x9  | GHB (liquid e, Fantasy)                                                                                                              | Never .....1<br>Once or twice .....2<br>Monthly .....3<br>Weekly .....4<br>Daily or almost daily .....5 |
| Q182_x10 | Other party drugs                                                                                                                    | Never .....1<br>Once or twice .....2<br>Monthly .....3<br>Weekly .....4<br>Daily or almost daily .....5 |
| Q182_x11 | Over-the-counter or prescription pain killers and analgesics<br>(e.g. cough medicine, Mersyndol, Panadeine, codeine,<br>hydrocodone) | Never .....1<br>Once or twice .....2<br>Monthly .....3<br>Weekly .....4<br>Daily or almost daily .....5 |
| Q182_x12 | Over-the-counter or prescription stimulants (e.g. No-do, do,<br>pseudoephedrine, dexamphetamine, Ritalin, diet pills)                | Never .....1<br>Once or twice .....2<br>Monthly .....3<br>Weekly .....4<br>Daily or almost daily .....5 |
| Q182_x13 | Other                                                                                                                                | Never .....1<br>Once or twice .....2<br>Monthly .....3<br>Weekly .....4<br>Daily or almost daily .....5 |

---

\*\*\*\*\*  
 FOR EACH SUBSTANCE SELECTED AT Q165, Q168 AND Q172,  
 COMPLETE Q183 TO Q200  
 ELSE GO TO Q201  
 \*\*\*\*\*

|          |                                                                                                                                                                                                                            |                                                                                         |
|----------|----------------------------------------------------------------------------------------------------------------------------------------------------------------------------------------------------------------------------|-----------------------------------------------------------------------------------------|
| Q183     | During the period that you used each of these substances the most, how often did you use it? Non-medical use only: do not include items that were taken in the quantities and manner prescribed by a medical professional. |                                                                                         |
| Q183_x1  | Alcohol (beer, wine, spirits)                                                                                                                                                                                              | Once or twice .....1<br>Monthly .....2<br>Weekly .....3<br>Daily or almost daily .....4 |
| Q183_x2  | Tobacco products (e.g cigarettes, chewing tobacco, cigars)                                                                                                                                                                 | Once or twice .....1<br>Monthly .....2<br>Weekly .....3<br>Daily or almost daily .....4 |
| Q183_x3  | E-cigarettes                                                                                                                                                                                                               | Once or twice .....1<br>Monthly .....2<br>Weekly .....3<br>Daily or almost daily .....4 |
| Q183_x4  | Cannabis (marijuana)                                                                                                                                                                                                       | Once or twice .....1<br>Monthly .....2<br>Weekly .....3<br>Daily or almost daily .....4 |
| Q183_xx1 | Cocaine                                                                                                                                                                                                                    | Once or twice .....1<br>Monthly .....2<br>Weekly .....3<br>Daily or almost daily .....4 |
| Q183_xx2 | Amphetamine-type stimulants (e.g. ice, speed)                                                                                                                                                                              | Once or twice .....1<br>Monthly .....2<br>Weekly .....3<br>Daily or almost daily .....4 |
| Q183_xx3 | Inhalants (e.g. glue, petrol, paint thinner, nitrous oxide)                                                                                                                                                                | Once or twice .....1<br>Monthly .....2<br>Weekly .....3<br>Daily or almost daily .....4 |
| Q183_xx4 | Sedatives or sleeping pills (e.g. Valium, Serepax, Rohypnol)                                                                                                                                                               | Once or twice .....1<br>Monthly .....2<br>Weekly .....3<br>Daily or almost daily .....4 |
| Q183_xx5 | Hallucinogens (e.g. LSD, acid, mushrooms, PCP)                                                                                                                                                                             | Once or twice .....1<br>Monthly .....2<br>Weekly .....3<br>Daily or almost daily .....4 |
| Q183_xx6 | Opioids (e.g. heroin, morphine, methadone)                                                                                                                                                                                 | Once or twice .....1<br>Monthly .....2<br>Weekly .....3<br>Daily or almost daily .....4 |
| Q183_xx7 | Ecstasy (E, MDMA)                                                                                                                                                                                                          | Once or twice .....1<br>Monthly .....2<br>Weekly .....3<br>Daily or almost daily .....4 |
| Q183_xx8 | Ketamine (Special K)                                                                                                                                                                                                       | Once or twice .....1<br>Monthly .....2<br>Weekly .....3                                 |

|           |                                                                                                                                      |                             |   |
|-----------|--------------------------------------------------------------------------------------------------------------------------------------|-----------------------------|---|
|           |                                                                                                                                      | Daily or almost daily ..... | 4 |
| Q183_xx9  | GHB (liquid e, Fantasy)                                                                                                              | Once or twice .....         | 1 |
|           |                                                                                                                                      | Monthly .....               | 2 |
|           |                                                                                                                                      | Weekly .....                | 3 |
|           |                                                                                                                                      | Daily or almost daily ..... | 4 |
| Q183_xx10 | Other party drugs                                                                                                                    | Once or twice .....         | 1 |
|           |                                                                                                                                      | Monthly .....               | 2 |
|           |                                                                                                                                      | Weekly .....                | 3 |
|           |                                                                                                                                      | Daily or almost daily ..... | 4 |
| Q183_xx11 | Over-the-counter or prescription pain killers and analgesics<br>(e.g. cough medicine, Mersyndol, Panadeine, codeine,<br>hydrocodone) | Once or twice .....         | 1 |
|           |                                                                                                                                      | Monthly .....               | 2 |
|           |                                                                                                                                      | Weekly .....                | 3 |
|           |                                                                                                                                      | Daily or almost daily ..... | 4 |
| Q183_xx12 | Over-the-counter or prescription stimulants (e.g. No-doz,<br>pseudoephedrine, dexamphetamine, Ritalin, diet pills)                   | Once or twice .....         | 1 |
|           |                                                                                                                                      | Monthly .....               | 2 |
|           |                                                                                                                                      | Weekly .....                | 3 |
|           |                                                                                                                                      | Daily or almost daily ..... | 4 |
| Q183_xx13 | Other                                                                                                                                | Once or twice .....         | 1 |
|           |                                                                                                                                      | Monthly .....               | 2 |
|           |                                                                                                                                      | Weekly .....                | 3 |
|           |                                                                                                                                      | Daily or almost daily ..... | 4 |

---

|           |                                                                                                                                                                                                                                                                                                                                             |                         |
|-----------|---------------------------------------------------------------------------------------------------------------------------------------------------------------------------------------------------------------------------------------------------------------------------------------------------------------------------------------------|-------------------------|
| Q184      | The following questions will ask you about experiences you may have had while using alcohol, tobacco or other substances for non-medical purposes. For each of the following questions, think about the 12-month period in your life when you used each substance the most. This may have been at different times for different substances. |                         |
|           | Did you often use a lot more of any of these substances than you intended to?                                                                                                                                                                                                                                                               |                         |
| Q184_x1   | Alcohol (beer, wine, spirits)                                                                                                                                                                                                                                                                                                               | No .....1<br>Yes .....2 |
| Q184_x2   | Tobacco products (e.g cigarettes, chewing tobacco, cigars)                                                                                                                                                                                                                                                                                  | No .....1<br>Yes .....2 |
| Q184_x3   | E-cigarettes                                                                                                                                                                                                                                                                                                                                | No .....1<br>Yes .....2 |
| Q184_x4   | Cannabis (marijuana)                                                                                                                                                                                                                                                                                                                        | No .....1<br>Yes .....2 |
| Q184_xx1  | Cocaine                                                                                                                                                                                                                                                                                                                                     | No .....1<br>Yes .....2 |
| Q184_xx2  | Amphetamine-type stimulants (e.g. ice, speed)                                                                                                                                                                                                                                                                                               | No .....1<br>Yes .....2 |
| Q184_xx3  | Inhalants (e.g. glue, petrol, paint thinner, nitrous oxide)                                                                                                                                                                                                                                                                                 | No .....1<br>Yes .....2 |
| Q184_xx4  | Sedatives or sleeping pills (e.g. Valium, Serepax, Rohypnol)                                                                                                                                                                                                                                                                                | No .....1<br>Yes .....2 |
| Q184_xx5  | Hallucinogens (e.g. LSD, acid, mushrooms, PCP)                                                                                                                                                                                                                                                                                              | No .....1<br>Yes .....2 |
| Q184_xx6  | Opioids (e.g. heroin, morphine, methadone)                                                                                                                                                                                                                                                                                                  | No .....1<br>Yes .....2 |
| Q184_xx7  | Ecstasy (E, MDMA)                                                                                                                                                                                                                                                                                                                           | No .....1<br>Yes .....2 |
| Q184_xx8  | Ketamine (Special K)                                                                                                                                                                                                                                                                                                                        | No .....1<br>Yes .....2 |
| Q184_xx9  | GHB (liquid e, Fantasy)                                                                                                                                                                                                                                                                                                                     | No .....1<br>Yes .....2 |
| Q184_xx10 | Other party drugs                                                                                                                                                                                                                                                                                                                           | No .....1<br>Yes .....2 |
| Q184_xx11 | Over-the-counter or prescription pain killers and analgesics (e.g. cough medicine, Mersyndol, Panadeine, codeine, hydrocodone)                                                                                                                                                                                                              | No .....1<br>Yes .....2 |
| Q184_xx12 | Over-the-counter or prescription stimulants (e.g. No-do, pseudoephedrine, dexamphetamine, Ritalin, diet pills)                                                                                                                                                                                                                              | No .....1<br>Yes .....2 |
| Q184_xx13 | Other                                                                                                                                                                                                                                                                                                                                       | No .....1<br>Yes .....2 |

|           |                                                                                                                                |                         |
|-----------|--------------------------------------------------------------------------------------------------------------------------------|-------------------------|
| Q185      | Did you often use any of these substances over a longer period of time than you intended to?                                   |                         |
| Q185_x1   | Alcohol (beer, wine, spirits)                                                                                                  | No .....1<br>Yes .....2 |
| Q185_x2   | Tobacco products (e.g cigarettes, chewing tobacco, cigars)                                                                     | No .....1<br>Yes .....2 |
| Q185_x3   | E-cigarettes                                                                                                                   | No .....1<br>Yes .....2 |
| Q185_x4   | Cannabis (marijuana)                                                                                                           | No .....1<br>Yes .....2 |
| Q185_xx1  | Cocaine                                                                                                                        | No .....1<br>Yes .....2 |
| Q185_xx2  | Amphetamine-type stimulants (e.g. ice, speed)                                                                                  | No .....1<br>Yes .....2 |
| Q185_xx3  | Inhalants (e.g. glue, petrol, paint thinner, nitrous oxide)                                                                    | No .....1<br>Yes .....2 |
| Q185_xx4  | Sedatives or sleeping pills (e.g. Valium, Serepax, Rohypnol)                                                                   | No .....1<br>Yes .....2 |
| Q185_xx5  | Hallucinogens (e.g. LSD, acid, mushrooms, PCP)                                                                                 | No .....1<br>Yes .....2 |
| Q185_xx6  | Opioids (e.g. heroin, morphine, methadone)                                                                                     | No .....1<br>Yes .....2 |
| Q185_xx7  | Ecstasy (E, MDMA)                                                                                                              | No .....1<br>Yes .....2 |
| Q185_xx8  | Ketamine (Special K)                                                                                                           | No .....1<br>Yes .....2 |
| Q185_xx9  | GHB (liquid e, Fantasy)                                                                                                        | No .....1<br>Yes .....2 |
| Q185_xx10 | Other party drugs                                                                                                              | No .....1<br>Yes .....2 |
| Q185_xx11 | Over-the-counter or prescription pain killers and analgesics (e.g. cough medicine, Mersyndol, Panadeine, codeine, hydrocodone) | No .....1<br>Yes .....2 |
| Q185_xx12 | Over-the-counter or prescription stimulants (e.g. No-doz, pseudoephedrine, dexamphetamine, Ritalin, diet pills)                | No .....1<br>Yes .....2 |
| Q185_xx13 | Other                                                                                                                          | No .....1<br>Yes .....2 |

|           |                                                                                                                                |                         |
|-----------|--------------------------------------------------------------------------------------------------------------------------------|-------------------------|
| Q186      | Did you keep wanting to cut down or control your use of any of these substances?                                               |                         |
| Q186_x1   | Alcohol (beer, wine, spirits)                                                                                                  | No .....1<br>Yes .....2 |
| Q186_x2   | Tobacco products (e.g cigarettes, chewing tobacco, cigars)                                                                     | No .....1<br>Yes .....2 |
| Q186_x3   | E-cigarettes                                                                                                                   | No .....1<br>Yes .....2 |
| Q186_x4   | Cannabis (marijuana)                                                                                                           | No .....1<br>Yes .....2 |
| Q186_xx1  | Cocaine                                                                                                                        | No .....1<br>Yes .....2 |
| Q186_xx2  | Amphetamine-type stimulants (e.g. ice, speed)                                                                                  | No .....1<br>Yes .....2 |
| Q186_xx3  | Inhalants (e.g. glue, petrol, paint thinner, nitrous oxide)                                                                    | No .....1<br>Yes .....2 |
| Q186_xx4  | Sedatives or sleeping pills (e.g. Valium, Serepax, Rohypnol)                                                                   | No .....1<br>Yes .....2 |
| Q186_xx5  | Hallucinogens (e.g. LSD, acid, mushrooms, PCP)                                                                                 | No .....1<br>Yes .....2 |
| Q186_xx6  | Opioids (e.g. heroin, morphine, methadone)                                                                                     | No .....1<br>Yes .....2 |
| Q186_xx7  | Ecstasy (E, MDMA)                                                                                                              | No .....1<br>Yes .....2 |
| Q186_xx8  | Ketamine (Special K)                                                                                                           | No .....1<br>Yes .....2 |
| Q186_xx9  | GHB (liquid e, Fantasy)                                                                                                        | No .....1<br>Yes .....2 |
| Q186_xx10 | Other party drugs                                                                                                              | No .....1<br>Yes .....2 |
| Q186_xx11 | Over-the-counter or prescription pain killers and analgesics (e.g. cough medicine, Mersyndol, Panadeine, codeine, hydrocodone) | No .....1<br>Yes .....2 |
| Q186_xx12 | Over-the-counter or prescription stimulants (e.g. No-doz, pseudoephedrine, dexamphetamine, Ritalin, diet pills)                | No .....1<br>Yes .....2 |
| Q186_xx13 | Other                                                                                                                          | No .....1<br>Yes .....2 |

---

|           |                                                                                                                                |           |   |
|-----------|--------------------------------------------------------------------------------------------------------------------------------|-----------|---|
| Q187      | Did you try to cut down or control your use of any of these substances and find that you couldn't?                             |           |   |
| Q187_x1   | Alcohol (beer, wine, spirits)                                                                                                  | No .....  | 1 |
|           |                                                                                                                                | Yes ..... | 2 |
| Q187_x2   | Tobacco products (e.g cigarettes, chewing tobacco, cigars)                                                                     | No .....  | 1 |
|           |                                                                                                                                | Yes ..... | 2 |
| Q187_x3   | E-cigarettes                                                                                                                   | No .....  | 1 |
|           |                                                                                                                                | Yes ..... | 2 |
| Q187_x4   | Cannabis (marijuana)                                                                                                           | No .....  | 1 |
|           |                                                                                                                                | Yes ..... | 2 |
| Q187_xx1  | Cocaine                                                                                                                        | No .....  | 1 |
|           |                                                                                                                                | Yes ..... | 2 |
| Q187_xx2  | Amphetamine-type stimulants (e.g. ice, speed)                                                                                  | No .....  | 1 |
|           |                                                                                                                                | Yes ..... | 2 |
| Q187_xx3  | Inhalants (e.g. glue, petrol, paint thinner, nitrous oxide)                                                                    | No .....  | 1 |
|           |                                                                                                                                | Yes ..... | 2 |
| Q187_xx4  | Sedatives or sleeping pills (e.g. Valium, Serepax, Rohypnol)                                                                   | No .....  | 1 |
|           |                                                                                                                                | Yes ..... | 2 |
| Q187_xx5  | Hallucinogens (e.g. LSD, acid, mushrooms, PCP)                                                                                 | No .....  | 1 |
|           |                                                                                                                                | Yes ..... | 2 |
| Q187_xx6  | Opioids (e.g. heroin, morphine, methadone)                                                                                     | No .....  | 1 |
|           |                                                                                                                                | Yes ..... | 2 |
| Q187_xx7  | Ecstasy (E, MDMA)                                                                                                              | No .....  | 1 |
|           |                                                                                                                                | Yes ..... | 2 |
| Q187_xx8  | Ketamine (Special K)                                                                                                           | No .....  | 1 |
|           |                                                                                                                                | Yes ..... | 2 |
| Q187_xx9  | GHB (liquid e, Fantasy)                                                                                                        | No .....  | 1 |
|           |                                                                                                                                | Yes ..... | 2 |
| Q187_xx10 | Other party drugs                                                                                                              | No .....  | 1 |
|           |                                                                                                                                | Yes ..... | 2 |
| Q187_xx11 | Over-the-counter or prescription pain killers and analgesics (e.g. cough medicine, Mersyndol, Panadeine, codeine, hydrocodone) | No .....  | 1 |
|           |                                                                                                                                | Yes ..... | 2 |
| Q187_xx12 | Over-the-counter or prescription stimulants (e.g. No-do, pseudoephedrine, dexamphetamine, Ritalin, diet pills)                 | No .....  | 1 |
|           |                                                                                                                                | Yes ..... | 2 |
| Q187_xx13 | Other                                                                                                                          | No .....  | 1 |
|           |                                                                                                                                | Yes ..... | 2 |



|           |                                                                                                                                |                         |
|-----------|--------------------------------------------------------------------------------------------------------------------------------|-------------------------|
| Q188      | Did you spend a lot of time obtaining or using any of these substances, or recovering from their effects?                      |                         |
| Q188_x1   | Alcohol (beer, wine, spirits)                                                                                                  | No .....1<br>Yes .....2 |
| Q188_x2   | Tobacco products (e.g cigarettes, chewing tobacco, cigars)                                                                     | No .....1<br>Yes .....2 |
| Q188_x3   | E-cigarettes                                                                                                                   | No .....1<br>Yes .....2 |
| Q188_x4   | Cannabis (marijuana)                                                                                                           | No .....1<br>Yes .....2 |
| Q188_xx1  | Cocaine                                                                                                                        | No .....1<br>Yes .....2 |
| Q188_xx2  | Amphetamine-type stimulants (e.g. ice, speed)                                                                                  | No .....1<br>Yes .....2 |
| Q188_xx3  | Inhalants (e.g. glue, petrol, paint thinner, nitrous oxide)                                                                    | No .....1<br>Yes .....2 |
| Q188_xx4  | Sedatives or sleeping pills (e.g. Valium, Serepax, Rohypnol)                                                                   | No .....1<br>Yes .....2 |
| Q188_xx5  | Hallucinogens (e.g. LSD, acid, mushrooms, PCP)                                                                                 | No .....1<br>Yes .....2 |
| Q188_xx6  | Opioids (e.g. heroin, morphine, methadone)                                                                                     | No .....1<br>Yes .....2 |
| Q188_xx7  | Ecstasy (E, MDMA)                                                                                                              | No .....1<br>Yes .....2 |
| Q188_xx8  | Ketamine (Special K)                                                                                                           | No .....1<br>Yes .....2 |
| Q188_xx9  | Q188M GHB (liquid e, Fantasy)                                                                                                  | No .....1<br>Yes .....2 |
| Q188_xx10 | Q188N Other party drugs                                                                                                        | No .....1<br>Yes .....2 |
| Q188_xx11 | Over-the-counter or prescription pain killers and analgesics (e.g. cough medicine, Mersyndol, Panadeine, codeine, hydrocodone) | No .....1<br>Yes .....2 |
| Q188_xx12 | Over-the-counter or prescription stimulants (e.g. No-doz, pseudoephedrine, dexamphetamine, Ritalin, diet pills)                | No .....1<br>Yes .....2 |
| Q188_xx13 | Other                                                                                                                          | No .....1<br>Yes .....2 |

---

|           |                                                                                                                                |                         |
|-----------|--------------------------------------------------------------------------------------------------------------------------------|-------------------------|
| Q189      | In between those times when you were using any of these substances, did you have a strong desire or urge to use any of them?   |                         |
| Q189_x1   | Alcohol (beer, wine, spirits)                                                                                                  | No .....1<br>Yes .....2 |
| Q189_x2   | Tobacco products (e.g cigarettes, chewing tobacco, cigars)                                                                     | No .....1<br>Yes .....2 |
| Q189_x3   | E-cigarettes                                                                                                                   | No .....1<br>Yes .....2 |
| Q189_x4   | Cannabis (marijuana)                                                                                                           | No .....1<br>Yes .....2 |
| Q189_xx1  | Cocaine                                                                                                                        | No .....1<br>Yes .....2 |
| Q189_xx2  | Amphetamine-type stimulants (e.g. ice, speed)                                                                                  | No .....1<br>Yes .....2 |
| Q189_xx3  | Inhalants (e.g. glue, petrol, paint thinner, nitrous oxide)                                                                    | No .....1<br>Yes .....2 |
| Q189_xx4  | Sedatives or sleeping pills (e.g. Valium, Serepax, Rohypnol)                                                                   | No .....1<br>Yes .....2 |
| Q189_xx5  | Hallucinogens (e.g. LSD, acid, mushrooms, PCP)                                                                                 | No .....1<br>Yes .....2 |
| Q189_xx6  | Opioids (e.g. heroin, morphine, methadone)                                                                                     | No .....1<br>Yes .....2 |
| Q189_xx7  | Ecstasy (E, MDMA)                                                                                                              | No .....1<br>Yes .....2 |
| Q189_xx8  | Ketamine (Special K)                                                                                                           | No .....1<br>Yes .....2 |
| Q189_xx9  | GHB (liquid e, Fantasy)                                                                                                        | No .....1<br>Yes .....2 |
| Q189_xx10 | Other party drugs                                                                                                              | No .....1<br>Yes .....2 |
| Q189_xx11 | Over-the-counter or prescription pain killers and analgesics (e.g. cough medicine, Mersyndol, Panadeine, codeine, hydrocodone) | No .....1<br>Yes .....2 |
| Q189_xx12 | Over-the-counter or prescription stimulants (e.g. No-do, pseudoephedrine, dexamphetamine, Ritalin, diet pills)                 | No .....1<br>Yes .....2 |
| Q189_xx13 | Other                                                                                                                          | No .....1<br>Yes .....2 |

|           |                                                                                                                                     |                                                                       |
|-----------|-------------------------------------------------------------------------------------------------------------------------------------|-----------------------------------------------------------------------|
| Q190      | Did you ever fail to do what was normally expected of you (at work, school or home) because of your use of any of these substances? |                                                                       |
| Q190_x1   | Alcohol (beer, wine, spirits)                                                                                                       | No .....1<br>Yes, once or twice .....2<br>Yes, 3 times or more .....3 |
| Q190_x2   | Tobacco products (e.g cigarettes, chewing tobacco, cigars)                                                                          | No .....1<br>Yes, once or twice .....2<br>Yes, 3 times or more .....3 |
| Q190_x3   | E-cigarettes                                                                                                                        | No .....1<br>Yes, once or twice .....2<br>Yes, 3 times or more .....3 |
| Q190_x4   | Cannabis (marijuana)                                                                                                                | No .....1<br>Yes, once or twice .....2<br>Yes, 3 times or more .....3 |
| Q190_xx1  | Cocaine                                                                                                                             | No .....1<br>Yes, once or twice .....2<br>Yes, 3 times or more .....3 |
| Q190_xx2  | Amphetamine-type stimulants (e.g. ice, speed)                                                                                       | No .....1<br>Yes, once or twice .....2<br>Yes, 3 times or more .....3 |
| Q190_xx3  | Inhalants (e.g. glue, petrol, paint thinner, nitrous oxide)                                                                         | No .....1<br>Yes, once or twice .....2<br>Yes, 3 times or more .....3 |
| Q190_xx4  | Sedatives or sleeping pills (e.g. Valium, Serepax, Rohypnol)                                                                        | No .....1<br>Yes, once or twice .....2<br>Yes, 3 times or more .....3 |
| Q190_xx5  | Hallucinogens (e.g. LSD, acid, mushrooms, PCP)                                                                                      | No .....1<br>Yes, once or twice .....2<br>Yes, 3 times or more .....3 |
| Q190_xx6  | Opioids (e.g. heroin, morphine, methadone)                                                                                          | No .....1<br>Yes, once or twice .....2<br>Yes, 3 times or more .....3 |
| Q190_xx7  | Ecstasy (E, MDMA)                                                                                                                   | No .....1<br>Yes, once or twice .....2<br>Yes, 3 times or more .....3 |
| Q190_xx8  | Ketamine (Special K)                                                                                                                | No .....1<br>Yes, once or twice .....2<br>Yes, 3 times or more .....3 |
| Q190_xx9  | GHB (liquid e, Fantasy)                                                                                                             | No .....1<br>Yes, once or twice .....2<br>Yes, 3 times or more .....3 |
| Q190_xx10 | Other party drugs                                                                                                                   | No .....1<br>Yes, once or twice .....2<br>Yes, 3 times or more .....3 |
| Q190_xx11 | Over-the-counter or prescription pain killers and analgesics (e.g. cough medicine, Mersyndol, Panadeine, codeine, hydrocodone)      | No .....1<br>Yes, once or twice .....2<br>Yes, 3 times or more .....3 |

|           |                                                                                                                 |                                                                       |
|-----------|-----------------------------------------------------------------------------------------------------------------|-----------------------------------------------------------------------|
| Q190_xx12 | Over-the-counter or prescription stimulants (e.g. No-doz, pseudoephedrine, dexamphetamine, Ritalin, diet pills) | No .....1<br>Yes, once or twice .....2<br>Yes, 3 times or more .....3 |
| Q190_xx13 | Other                                                                                                           | No .....1<br>Yes, once or twice .....2<br>Yes, 3 times or more .....3 |

---

|           |                                                                                                                                                          |                                                                           |
|-----------|----------------------------------------------------------------------------------------------------------------------------------------------------------|---------------------------------------------------------------------------|
| Q191      | Did using any of these substances cause problems with other people (such as family members, friends, or people at work) or make existing problems worse? |                                                                           |
| Q191_x1   | Alcohol (beer, wine, spirits)                                                                                                                            | No .....1<br>Yes, and I quit using .....2<br>Yes, and I kept using .....3 |
| Q191_x2   | Tobacco products (e.g cigarettes, chewing tobacco, cigars)                                                                                               | No .....1<br>Yes, and I quit using .....2<br>Yes, and I kept using .....3 |
| Q191_x3   | E-cigarettes                                                                                                                                             | No .....1<br>Yes, and I quit using .....2<br>Yes, and I kept using .....3 |
| Q191_x4   | Cannabis (marijuana)                                                                                                                                     | No .....1<br>Yes, and I quit using .....2<br>Yes, and I kept using .....3 |
| Q191_xx1  | Cocaine                                                                                                                                                  | No .....1<br>Yes, and I quit using .....2<br>Yes, and I kept using .....3 |
| Q191_xx2  | Amphetamine-type stimulants (e.g. ice, speed)                                                                                                            | No .....1<br>Yes, and I quit using .....2<br>Yes, and I kept using .....3 |
| Q191_x3   | Inhalants (e.g. glue, petrol, paint thinner, nitrous oxide)                                                                                              | No .....1<br>Yes, and I quit using .....2<br>Yes, and I kept using .....3 |
| Q191_xx4  | Sedatives or sleeping pills (e.g. Valium, Serepax, Rohypnol)                                                                                             | No .....1<br>Yes, and I quit using .....2<br>Yes, and I kept using .....3 |
| Q191_xx5  | Hallucinogens (e.g. LSD, acid, mushrooms, PCP)                                                                                                           | No .....1<br>Yes, and I quit using .....2<br>Yes, and I kept using .....3 |
| Q191_xx6  | Opioids (e.g. heroin, morphine, methadone)                                                                                                               | No .....1<br>Yes, and I quit using .....2<br>Yes, and I kept using .....3 |
| Q191_xx7  | Ecstasy (E, MDMA)                                                                                                                                        | No .....1<br>Yes, and I quit using .....2<br>Yes, and I kept using .....3 |
| Q191_xx8  | Ketamine (Special K)                                                                                                                                     | No .....1<br>Yes, and I quit using .....2<br>Yes, and I kept using .....3 |
| Q191_xx9  | GHB (liquid e, Fantasy)                                                                                                                                  | No .....1<br>Yes, and I quit using .....2<br>Yes, and I kept using .....3 |
| Q191_xx10 | Other party drugs                                                                                                                                        | No .....1<br>Yes, and I quit using .....2<br>Yes, and I kept using .....3 |
| Q191_xx11 | Over-the-counter or prescription pain killers and analgesics (e.g. cough medicine, Mersyndol, Panadeine, codeine, hydrocodone)                           | No .....1<br>Yes, and I quit using .....2<br>Yes, and I kept using .....3 |

|           |                                                                                                                 |                                                                           |
|-----------|-----------------------------------------------------------------------------------------------------------------|---------------------------------------------------------------------------|
| Q191_xx12 | Over-the-counter or prescription stimulants (e.g. No-doz, pseudoephedrine, dexamphetamine, Ritalin, diet pills) | No .....1<br>Yes, and I quit using .....2<br>Yes, and I kept using .....3 |
| Q191_xx13 | Other                                                                                                           | No .....1<br>Yes, and I quit using .....2<br>Yes, and I kept using .....3 |

---

|           |                                                                                                                                                                             |                         |
|-----------|-----------------------------------------------------------------------------------------------------------------------------------------------------------------------------|-------------------------|
| Q192      | Did you ever give up or reduce important activities (like sports, hobbies, work, or time with friends or relatives) because of your use of any of the following substances? |                         |
| Q192_x1   | Alcohol (beer, wine, spirits)                                                                                                                                               | No .....1<br>Yes .....2 |
| Q192_x2   | Tobacco products (e.g cigarettes, chewing tobacco, cigars)                                                                                                                  | No .....1<br>Yes .....2 |
| Q192_x3   | E-cigarettes                                                                                                                                                                | No .....1<br>Yes .....2 |
| Q192_x4   | Cannabis (marijuana)                                                                                                                                                        | No .....1<br>Yes .....2 |
| Q192_xx1  | Cocaine                                                                                                                                                                     | No .....1<br>Yes .....2 |
| Q192_xx2  | Amphetamine-type stimulants (e.g. ice, speed)                                                                                                                               | No .....1<br>Yes .....2 |
| Q192_xx3  | Inhalants (e.g. glue, petrol, paint thinner, nitrous oxide)                                                                                                                 | No .....1<br>Yes .....2 |
| Q192_xx4  | Sedatives or sleeping pills (e.g. Valium, Serepax, Rohypnol)                                                                                                                | No .....1<br>Yes .....2 |
| Q192_xx5  | Hallucinogens (e.g. LSD, acid, mushrooms, PCP)                                                                                                                              | No .....1<br>Yes .....2 |
| Q192_xx6  | Opioids (e.g. heroin, morphine, methadone)                                                                                                                                  | No .....1<br>Yes .....2 |
| Q192_xx7  | Ecstasy (E, MDMA)                                                                                                                                                           | No .....1<br>Yes .....2 |
| Q192_xx8  | Ketamine (Special K)                                                                                                                                                        | No .....1<br>Yes .....2 |
| Q192_xx9  | GHB (liquid e, Fantasy)                                                                                                                                                     | No .....1<br>Yes .....2 |
| Q192_xx10 | Other party drugs                                                                                                                                                           | No .....1<br>Yes .....2 |
| Q192_xx11 | Over-the-counter or prescription pain killers and analgesics (e.g. cough medicine, Mersyndol, Panadeine, codeine, hydrocodone)                                              | No .....1<br>Yes .....2 |
| Q192_xx12 | Over-the-counter or prescription stimulants (e.g. No-do, pseudoephedrine, dexamphetamine, Ritalin, diet pills)                                                              | No .....1<br>Yes .....2 |
| Q192_xx13 | Other                                                                                                                                                                       | No .....1<br>Yes .....2 |

---

|           |                                                                                                                                                                                                                  |                                                                       |
|-----------|------------------------------------------------------------------------------------------------------------------------------------------------------------------------------------------------------------------|-----------------------------------------------------------------------|
| Q193      | Did you ever use any of these substances in a situation in which it might have been physically hazardous (like driving a car, motorbike or boat; climbing; swimming; or operating machinery or power equipment)? |                                                                       |
| Q193_x1   | Alcohol (beer, wine, spirits)                                                                                                                                                                                    | No .....1<br>Yes, once or twice .....2<br>Yes, 3 times or more .....3 |
| Q193_x2   | Tobacco products (e.g cigarettes, chewing tobacco, cigars)                                                                                                                                                       | No .....1<br>Yes, once or twice .....2<br>Yes, 3 times or more .....3 |
| Q193_x3   | E-cigarettes                                                                                                                                                                                                     | No .....1<br>Yes, once or twice .....2<br>Yes, 3 times or more .....3 |
| Q193_x4   | Cannabis (marijuana)                                                                                                                                                                                             | No .....1<br>Yes, once or twice .....2<br>Yes, 3 times or more .....3 |
| Q193_xx1  | Cocaine                                                                                                                                                                                                          | No .....1<br>Yes, once or twice .....2<br>Yes, 3 times or more .....3 |
| Q193_xx2  | Amphetamine-type stimulants (e.g. ice, speed)                                                                                                                                                                    | No .....1<br>Yes, once or twice .....2<br>Yes, 3 times or more .....3 |
| Q193_xx3  | Inhalants (e.g. glue, petrol, paint thinner, nitrous oxide)                                                                                                                                                      | No .....1<br>Yes, once or twice .....2<br>Yes, 3 times or more .....3 |
| Q193_xx4  | Sedatives or sleeping pills (e.g. Valium, Serepax, Rohypnol)                                                                                                                                                     | No .....1<br>Yes, once or twice .....2<br>Yes, 3 times or more .....3 |
| Q193_xx5  | Hallucinogens (e.g. LSD, acid, mushrooms, PCP)                                                                                                                                                                   | No .....1<br>Yes, once or twice .....2<br>Yes, 3 times or more .....3 |
| Q193_xx6  | Opioids (e.g. heroin, morphine, methadone)                                                                                                                                                                       | No .....1<br>Yes, once or twice .....2<br>Yes, 3 times or more .....3 |
| Q193_xx7  | Ecstasy (E, MDMA)                                                                                                                                                                                                | No .....1<br>Yes, once or twice .....2<br>Yes, 3 times or more .....3 |
| Q193_xx8  | Ketamine (Special K)                                                                                                                                                                                             | No .....1<br>Yes, once or twice .....2<br>Yes, 3 times or more .....3 |
| Q193_xx9  | GHB (liquid e, Fantasy)                                                                                                                                                                                          | No .....1<br>Yes, once or twice .....2<br>Yes, 3 times or more .....3 |
| Q193_xx10 | Other party drugs                                                                                                                                                                                                | No .....1<br>Yes, once or twice .....2<br>Yes, 3 times or more .....3 |
| Q193_xx11 | Over-the-counter or prescription pain killers and analgesics (e.g. cough medicine, Mersyndol, Panadeine, codeine,                                                                                                | No .....1<br>Yes, once or twice .....2                                |



|                           |                                                                                                                 |                            |   |
|---------------------------|-----------------------------------------------------------------------------------------------------------------|----------------------------|---|
|                           | hydrocodone)                                                                                                    | Yes, 3 times or more ..... | 3 |
| <a href="#">Q193_xx12</a> | Over-the-counter or prescription stimulants (e.g. No-doz, pseudoephedrine, dexamphetamine, Ritalin, diet pills) | No .....                   | 1 |
|                           |                                                                                                                 | Yes, once or twice .....   | 2 |
|                           |                                                                                                                 | Yes, 3 times or more ..... | 3 |
| <a href="#">Q193_xx13</a> | Other                                                                                                           | No .....                   | 1 |
|                           |                                                                                                                 | Yes, once or twice .....   | 2 |
|                           |                                                                                                                 | Yes, 3 times or more ..... | 3 |

---

|           |                                                                                                                                |                                                                           |
|-----------|--------------------------------------------------------------------------------------------------------------------------------|---------------------------------------------------------------------------|
| Q194      | Did using any of these substances ever cause you physical health problems, or make an existing physical health problem worse?  |                                                                           |
| Q194_x1   | Alcohol (beer, wine, spirits)                                                                                                  | No .....1<br>Yes, and I quit using .....2<br>Yes, and I kept using .....3 |
| Q194_x2   | Tobacco products (e.g cigarettes, chewing tobacco, cigars)                                                                     | No .....1<br>Yes, and I quit using .....2<br>Yes, and I kept using .....3 |
| Q194_x3   | E-cigarettes                                                                                                                   | No .....1<br>Yes, and I quit using .....2<br>Yes, and I kept using .....3 |
| Q194_x4   | Cannabis (marijuana)                                                                                                           | No .....1<br>Yes, and I quit using .....2<br>Yes, and I kept using .....3 |
| Q194_xx1  | Cocaine                                                                                                                        | No .....1<br>Yes, and I quit using .....2<br>Yes, and I kept using .....3 |
| Q194_xx2  | Amphetamine-type stimulants (e.g. ice, speed)                                                                                  | No .....1<br>Yes, and I quit using .....2<br>Yes, and I kept using .....3 |
| Q194_xx3  | Inhalants (e.g. glue, petrol, paint thinner, nitrous oxide)                                                                    | No .....1<br>Yes, and I quit using .....2<br>Yes, and I kept using .....3 |
| Q194_xx4  | Sedatives or sleeping pills (e.g. Valium, Serepax, Rohypnol)                                                                   | No .....1<br>Yes, and I quit using .....2<br>Yes, and I kept using .....3 |
| Q194_xx5  | Hallucinogens (e.g. LSD, acid, mushrooms, PCP)                                                                                 | No .....1<br>Yes, and I quit using .....2<br>Yes, and I kept using .....3 |
| Q194_xx6  | Opioids (e.g. heroin, morphine, methadone)                                                                                     | No .....1<br>Yes, and I quit using .....2<br>Yes, and I kept using .....3 |
| Q194_xx7  | Ecstasy (E, MDMA)                                                                                                              | No .....1<br>Yes, and I quit using .....2<br>Yes, and I kept using .....3 |
| Q194_xx8  | Ketamine (Special K)                                                                                                           | No .....1<br>Yes, and I quit using .....2<br>Yes, and I kept using .....3 |
| Q194_xx9  | GHB (liquid e, Fantasy)                                                                                                        | No .....1<br>Yes, and I quit using .....2<br>Yes, and I kept using .....3 |
| Q194_xx10 | Other party drugs                                                                                                              | No .....1<br>Yes, and I quit using .....2<br>Yes, and I kept using .....3 |
| Q194_xx11 | Over-the-counter or prescription pain killers and analgesics (e.g. cough medicine, Mersyndol, Panadeine, codeine, hydrocodone) | No .....1<br>Yes, and I quit using .....2<br>Yes, and I kept using .....3 |

|                           |                                                                                                                 |                                                                           |
|---------------------------|-----------------------------------------------------------------------------------------------------------------|---------------------------------------------------------------------------|
| <a href="#">Q194_xx12</a> | Over-the-counter or prescription stimulants (e.g. No-doz, pseudoephedrine, dexamphetamine, Ritalin, diet pills) | No .....1<br>Yes, and I quit using .....2<br>Yes, and I kept using .....3 |
| <a href="#">Q194_xx13</a> | Other                                                                                                           | No .....1<br>Yes, and I quit using .....2<br>Yes, and I kept using .....3 |

---

|           |                                                                                                                                                                                                                                        |                                                                           |
|-----------|----------------------------------------------------------------------------------------------------------------------------------------------------------------------------------------------------------------------------------------|---------------------------------------------------------------------------|
| Q195      | Did using any of these substances ever cause you psychological problems (like making you depressed or anxious, making it hard to sleep, making it hard to remember things clearly) or cause existing problems like these to get worse? |                                                                           |
| Q195_x1   | Alcohol (beer, wine, spirits)                                                                                                                                                                                                          | No .....1<br>Yes, and I quit using .....2<br>Yes, and I kept using .....3 |
| Q195_x2   | Tobacco products (e.g cigarettes, chewing tobacco, cigars)                                                                                                                                                                             | No .....1<br>Yes, and I quit using .....2<br>Yes, and I kept using .....3 |
| Q195_x3   | E-cigarettes                                                                                                                                                                                                                           | No .....1<br>Yes, and I quit using .....2<br>Yes, and I kept using .....3 |
| Q195_x4   | Cannabis (marijuana)                                                                                                                                                                                                                   | No .....1<br>Yes, and I quit using .....2<br>Yes, and I kept using .....3 |
| Q195_xx1  | Cocaine                                                                                                                                                                                                                                | No .....1<br>Yes, and I quit using .....2<br>Yes, and I kept using .....3 |
| Q195_xx2  | Amphetamine-type stimulants (e.g. ice, speed)                                                                                                                                                                                          | No .....1<br>Yes, and I quit using .....2<br>Yes, and I kept using .....3 |
| Q195_xx3  | Inhalants (e.g. glue, petrol, paint thinner, nitrous oxide)                                                                                                                                                                            | No .....1<br>Yes, and I quit using .....2<br>Yes, and I kept using .....3 |
| Q195_xx4  | Sedatives or sleeping pills (e.g. Valium, Serepax, Rohypnol)                                                                                                                                                                           | No .....1<br>Yes, and I quit using .....2<br>Yes, and I kept using .....3 |
| Q195_xx5  | Hallucinogens (e.g. LSD, acid, mushrooms, PCP)                                                                                                                                                                                         | No .....1<br>Yes, and I quit using .....2<br>Yes, and I kept using .....3 |
| Q195_xx6  | Opioids (e.g. heroin, morphine, methadone)                                                                                                                                                                                             | No .....1<br>Yes, and I quit using .....2<br>Yes, and I kept using .....3 |
| Q195_xx7  | Ecstasy (E, MDMA)                                                                                                                                                                                                                      | No .....1<br>Yes, and I quit using .....2<br>Yes, and I kept using .....3 |
| Q195_xx8  | Ketamine (Special K)                                                                                                                                                                                                                   | No .....1<br>Yes, and I quit using .....2<br>Yes, and I kept using .....3 |
| Q195_xx9  | GHB (liquid e, Fantasy)                                                                                                                                                                                                                | No .....1<br>Yes, and I quit using .....2<br>Yes, and I kept using .....3 |
| Q195_xx10 | Other party drugs                                                                                                                                                                                                                      | No .....1<br>Yes, and I quit using .....2<br>Yes, and I kept using .....3 |
| Q195_xx11 | Over-the-counter or prescription pain killers and analgesics                                                                                                                                                                           | No .....1                                                                 |

|                           |                                                                                                                 |                                                                           |
|---------------------------|-----------------------------------------------------------------------------------------------------------------|---------------------------------------------------------------------------|
|                           | (e.g. cough medicine, Mersyndol, Panadeine, codeine, hydrocodone)                                               | Yes, and I quit using .....2<br>Yes, and I kept using .....3              |
| <a href="#">Q195_xx12</a> | Over-the-counter or prescription stimulants (e.g. No-doz, pseudoephedrine, dexamphetamine, Ritalin, diet pills) | No .....1<br>Yes, and I quit using .....2<br>Yes, and I kept using .....3 |
| <a href="#">Q195_xx13</a> | Other                                                                                                           | No .....1<br>Yes, and I quit using .....2<br>Yes, and I kept using .....3 |

---

|           |                                                                                                                                       |                         |
|-----------|---------------------------------------------------------------------------------------------------------------------------------------|-------------------------|
| Q196      | Over time, did you need to use a lot more of any of these substances to feel its effects compared to when you first started using it? |                         |
| Q196_x1   | Alcohol (beer, wine, spirits)                                                                                                         | No .....1<br>Yes .....2 |
| Q196_x2   | Tobacco products (e.g cigarettes, chewing tobacco, cigars)                                                                            | No .....1<br>Yes .....2 |
| Q196_x3   | E-cigarettes                                                                                                                          | No .....1<br>Yes .....2 |
| Q196_x4   | Cannabis (marijuana)                                                                                                                  | No .....1<br>Yes .....2 |
| Q196_xx1  | Cocaine                                                                                                                               | No .....1<br>Yes .....2 |
| Q196_xx2  | Amphetamine-type stimulants (e.g. ice, speed)                                                                                         | No .....1<br>Yes .....2 |
| Q196_xx3  | Inhalants (e.g. glue, petrol, paint thinner, nitrous oxide)                                                                           | No .....1<br>Yes .....2 |
| Q196_xx4  | Sedatives or sleeping pills (e.g. Valium, Serepax, Rohypnol)                                                                          | No .....1<br>Yes .....2 |
| Q196_xx5  | Hallucinogens (e.g. LSD, acid, mushrooms, PCP)                                                                                        | No .....1<br>Yes .....2 |
| Q196_xx6  | Opioids (e.g. heroin, morphine, methadone)                                                                                            | No .....1<br>Yes .....2 |
| Q196_xx7  | Ecstasy (E, MDMA)                                                                                                                     | No .....1<br>Yes .....2 |
| Q196_xx8  | Ketamine (Special K)                                                                                                                  | No .....1<br>Yes .....2 |
| Q196_xx9  | GHB (liquid e, Fantasy)                                                                                                               | No .....1<br>Yes .....2 |
| Q196_xx10 | Other party drugs                                                                                                                     | No .....1<br>Yes .....2 |
| Q196_xx11 | Over-the-counter or prescription pain killers and analgesics (e.g. cough medicine, Mersyndol, Panadeine, codeine, hydrocodone)        | No .....1<br>Yes .....2 |
| Q196_xx12 | Over-the-counter or prescription stimulants (e.g. No-doz, pseudoephedrine, dexamphetamine, Ritalin, diet pills)                       | No .....1<br>Yes .....2 |
| Q196_xx13 | Other                                                                                                                                 | No .....1<br>Yes .....2 |

|           |                                                                                                                                           |                         |
|-----------|-------------------------------------------------------------------------------------------------------------------------------------------|-------------------------|
| Q197      | Over time, did you find that the same amount of any of these substances had much less effect compared to when you first started using it? |                         |
| Q197_x1   | Alcohol (beer, wine, spirits)                                                                                                             | No .....1<br>Yes .....2 |
| Q197_x2   | Tobacco products (e.g cigarettes, chewing tobacco, cigars)                                                                                | No .....1<br>Yes .....2 |
| Q197_x3   | E-cigarettes                                                                                                                              | No .....1<br>Yes .....2 |
| Q197_x4   | Cannabis (marijuana)                                                                                                                      | No .....1<br>Yes .....2 |
| Q197_xx1  | Cocaine                                                                                                                                   | No .....1<br>Yes .....2 |
| Q197_xx2  | Amphetamine-type stimulants (e.g. ice, speed)                                                                                             | No .....1<br>Yes .....2 |
| Q197_xx3  | Inhalants (e.g. glue, petrol, paint thinner, nitrous oxide)                                                                               | No .....1<br>Yes .....2 |
| Q197_xx4  | Sedatives or sleeping pills (e.g. Valium, Serepax, Rohypnol)                                                                              | No .....1<br>Yes .....2 |
| Q197_xx5  | Hallucinogens (e.g. LSD, acid, mushrooms, PCP)                                                                                            | No .....1<br>Yes .....2 |
| Q197_xx6  | Opioids (e.g. heroin, morphine, methadone)                                                                                                | No .....1<br>Yes .....2 |
| Q197_xx7  | Ecstasy (E, MDMA)                                                                                                                         | No .....1<br>Yes .....2 |
| Q197_xx8  | Ketamine (Special K)                                                                                                                      | No .....1<br>Yes .....2 |
| Q197_xx9  | GHB (liquid e, Fantasy)                                                                                                                   | No .....1<br>Yes .....2 |
| Q197_xx10 | Other party drugs                                                                                                                         | No .....1<br>Yes .....2 |
| Q197_xx11 | Over-the-counter or prescription pain killers and analgesics (e.g. cough medicine, Mersyndol, Panadeine, codeine, hydrocodone)            | No .....1<br>Yes .....2 |
| Q197_xx12 | Over-the-counter or prescription stimulants (e.g. No-doz, pseudoephedrine, dexamphetamine, Ritalin, diet pills)                           | No .....1<br>Yes .....2 |
| Q197_xx13 | Q197Q Other                                                                                                                               | No .....1<br>Yes .....2 |

|          |                                                                                                                                                                                                                                                                                                                                                                                                                                                                                                                                                                                                                                                                                                                                                                            |                                                                                   |
|----------|----------------------------------------------------------------------------------------------------------------------------------------------------------------------------------------------------------------------------------------------------------------------------------------------------------------------------------------------------------------------------------------------------------------------------------------------------------------------------------------------------------------------------------------------------------------------------------------------------------------------------------------------------------------------------------------------------------------------------------------------------------------------------|-----------------------------------------------------------------------------------|
| Q198     | <p>People who cut down or stop using a substance after using it steadily for some time may not feel well. These feelings are more intense than the usual after-effects. These problems may include: trembling hands, being unable to sleep, feeling anxious, irritable or depressed, feeling restless, sweating, heart beating fast, fever or chills, nausea or vomiting, weight loss or decreased appetite, feeling physically weak, having headaches or difficulty concentrating, seizures, hearing / seeing things that aren't there.</p> <p>Still thinking about the 12-month period in your life when you used each of these substances the most: When you stopped, cut down or went without any of these substances, did you experience any problems like these?</p> |                                                                                   |
| Q198_x1  | Alcohol (beer, wine, spirits)                                                                                                                                                                                                                                                                                                                                                                                                                                                                                                                                                                                                                                                                                                                                              | No .....1<br>Yes .....2<br>I did not cut down or stop in that<br>12 months .....3 |
| Q198_x2  | Tobacco products (e.g cigarettes, chewing tobacco, cigars)                                                                                                                                                                                                                                                                                                                                                                                                                                                                                                                                                                                                                                                                                                                 | No .....1<br>Yes .....2<br>I did not cut down or stop in that<br>12 months .....3 |
| Q198_x3  | E-cigarettes                                                                                                                                                                                                                                                                                                                                                                                                                                                                                                                                                                                                                                                                                                                                                               | No .....1<br>Yes .....2<br>I did not cut down or stop in that<br>12 months .....3 |
| Q198_x4  | Cannabis (marijuana)                                                                                                                                                                                                                                                                                                                                                                                                                                                                                                                                                                                                                                                                                                                                                       | No .....1<br>Yes .....2<br>I did not cut down or stop in that<br>12 months .....3 |
| Q198_xx1 | Cocaine                                                                                                                                                                                                                                                                                                                                                                                                                                                                                                                                                                                                                                                                                                                                                                    | No .....1<br>Yes .....2<br>I did not cut down or stop in that<br>12 months .....3 |
| Q198_xx2 | Amphetamine-type stimulants (e.g. ice, speed)                                                                                                                                                                                                                                                                                                                                                                                                                                                                                                                                                                                                                                                                                                                              | No .....1<br>Yes .....2<br>I did not cut down or stop in that<br>12 months .....3 |
| Q198_xx3 | Inhalants (e.g. glue, petrol, paint thinner, nitrous oxide)                                                                                                                                                                                                                                                                                                                                                                                                                                                                                                                                                                                                                                                                                                                | No .....1<br>Yes .....2<br>I did not cut down or stop in that<br>12 months .....3 |
| Q198_xx4 | Sedatives or sleeping pills (e.g. Valium, Serepax, Rohypnol)                                                                                                                                                                                                                                                                                                                                                                                                                                                                                                                                                                                                                                                                                                               | No .....1<br>Yes .....2<br>I did not cut down or stop in that<br>12 months .....3 |
| Q198_xx5 | Hallucinogens (e.g. LSD, acid, mushrooms, PCP)                                                                                                                                                                                                                                                                                                                                                                                                                                                                                                                                                                                                                                                                                                                             | No .....1<br>Yes .....2<br>I did not cut down or stop in that<br>12 months .....3 |
| Q198_xx6 | Opioids (e.g. heroin, morphine, methadone)                                                                                                                                                                                                                                                                                                                                                                                                                                                                                                                                                                                                                                                                                                                                 | No .....1<br>Yes .....2<br>I did not cut down or stop in that                     |



|           |                                                                                                                                      |                                                                                   |
|-----------|--------------------------------------------------------------------------------------------------------------------------------------|-----------------------------------------------------------------------------------|
|           |                                                                                                                                      | 12 months .....3                                                                  |
| Q198_xx7  | Ecstasy (E, MDMA)                                                                                                                    | No .....1<br>Yes .....2<br>I did not cut down or stop in that<br>12 months .....3 |
| Q198_xx8  | Ketamine (Special K)                                                                                                                 | No .....1<br>Yes .....2<br>I did not cut down or stop in that<br>12 months .....3 |
| Q198_xx9  | GHB (liquid e, Fantasy)                                                                                                              | No .....1<br>Yes .....2<br>I did not cut down or stop in that<br>12 months .....3 |
| Q198_xx10 | Other party drugs                                                                                                                    | No .....1<br>Yes .....2<br>I did not cut down or stop in that<br>12 months .....3 |
| Q198_xx11 | Over-the-counter or prescription pain killers and analgesics<br>(e.g. cough medicine, Mersyndol, Panadeine, codeine,<br>hydrocodone) | No .....1<br>Yes .....2<br>I did not cut down or stop in that<br>12 months .....3 |
| Q198_xx12 | Over-the-counter or prescription stimulants (e.g. No-do, pseudoephedrine, dexamphetamine, Ritalin, diet pills)                       | No .....1<br>Yes .....2<br>I did not cut down or stop in that<br>12 months .....3 |
| Q198_xx13 | Other                                                                                                                                | No .....1<br>Yes .....2<br>I did not cut down or stop in that<br>12 months .....3 |

---

|           |                                                                                                                                |                         |
|-----------|--------------------------------------------------------------------------------------------------------------------------------|-------------------------|
| Q199      | Did you ever drink alcohol, take medication or drugs to keep from having these problems or to make them go away?               |                         |
| Q199_x1   | Alcohol (beer, wine, spirits)                                                                                                  | No .....1<br>Yes .....2 |
| Q199_x2   | Tobacco products (e.g cigarettes, chewing tobacco, cigars)                                                                     | No .....1<br>Yes .....2 |
| Q199_x3   | E-cigarettes                                                                                                                   | No .....1<br>Yes .....2 |
| Q199_x4   | Cannabis (marijuana)                                                                                                           | No .....1<br>Yes .....2 |
| Q199_xx1  | Cocaine                                                                                                                        | No .....1<br>Yes .....2 |
| Q199_xx2  | Amphetamine-type stimulants (e.g. ice, speed)                                                                                  | No .....1<br>Yes .....2 |
| Q199_xx3  | Inhalants (e.g. glue, petrol, paint thinner, nitrous oxide)                                                                    | No .....1<br>Yes .....2 |
| Q199_xx4  | Sedatives or sleeping pills (e.g. Valium, Serepax, Rohypnol)                                                                   | No .....1<br>Yes .....2 |
| Q199_xx5  | Hallucinogens (e.g. LSD, acid, mushrooms, PCP)                                                                                 | No .....1<br>Yes .....2 |
| Q199_xx6  | Opioids (e.g. heroin, morphine, methadone)                                                                                     | No .....1<br>Yes .....2 |
| Q199_xx7  | Ecstasy (E, MDMA)                                                                                                              | No .....1<br>Yes .....2 |
| Q199_xx8  | Ketamine (Special K)                                                                                                           | No .....1<br>Yes .....2 |
| Q199_xx9  | GHB (liquid e, Fantasy)                                                                                                        | No .....1<br>Yes .....2 |
| Q199_xx10 | Other party drugs                                                                                                              | No .....1<br>Yes .....2 |
| Q199_xx11 | Over-the-counter or prescription pain killers and analgesics (e.g. cough medicine, Mersyndol, Panadeine, codeine, hydrocodone) | No .....1<br>Yes .....2 |
| Q199_xx12 | Over-the-counter or prescription stimulants (e.g. No-doz, pseudoephedrine, dexamphetamine, Ritalin, diet pills)                | No .....1<br>Yes .....2 |
| Q199_xx13 | Other                                                                                                                          | No .....1<br>Yes .....2 |

\*\*\*\*\*  
 IF EVER TAKEN ANY ANTIDEPRESSANT (ANY OF Q10\_1 TO Q10\_11 = 1),  
 CONTINUE  
 ELSE GO TO Q201  
 \*\*\*\*\*

|          |                                                                                                                                                                       |                                                                                                                                       |
|----------|-----------------------------------------------------------------------------------------------------------------------------------------------------------------------|---------------------------------------------------------------------------------------------------------------------------------------|
| Q200     | During the time(s) you have taken antidepressants (even if it wasn't for anxiety or depression), did this change the amount you used any of the following substances? |                                                                                                                                       |
| Q200_x1  | Alcohol (beer, wine, spirits)                                                                                                                                         | No change .....1<br>Use increased while taking antidepressants .....2<br>Use decreased or stopped while taking antidepressants .....3 |
| Q200_x2  | Tobacco products (e.g cigarettes, chewing tobacco, cigars)                                                                                                            | No change .....1<br>Use increased while taking antidepressants .....2<br>Use decreased or stopped while taking antidepressants .....3 |
| Q200_x3  | E-cigarettes                                                                                                                                                          | No change .....1<br>Use increased while taking antidepressants .....2<br>Use decreased or stopped while taking antidepressants .....3 |
| Q200_x4  | Cannabis (marijuana)                                                                                                                                                  | No change .....1<br>Use increased while taking antidepressants .....2<br>Use decreased or stopped while taking antidepressants .....3 |
| Q200_xx1 | Cocaine                                                                                                                                                               | No change .....1<br>Use increased while taking antidepressants .....2<br>Use decreased or stopped while taking antidepressants .....3 |
| Q200_xx2 | Amphetamine-type stimulants (e.g. ice, speed)                                                                                                                         | No change .....1<br>Use increased while taking antidepressants .....2<br>Use decreased or stopped while taking antidepressants .....3 |
| Q200_xx3 | Inhalants (e.g. glue, petrol, paint thinner, nitrous oxide)                                                                                                           | No change .....1<br>Use increased while taking antidepressants .....2<br>Use decreased or stopped while taking antidepressants .....3 |
| Q200_xx4 | Sedatives or sleeping pills (e.g. Valium, Serepax, Rohypnol)                                                                                                          | No change .....1<br>Use increased while taking antidepressants .....2<br>Use decreased or stopped while taking antidepressants .....3 |
| Q200_xx5 | Hallucinogens (e.g. LSD, acid, mushrooms, PCP)                                                                                                                        | No change .....1<br>Use increased while taking antidepressants .....2<br>Use decreased or stopped while taking antidepressants .....3 |
| Q200_xx6 | Opioids (e.g. heroin, morphine, methadone)                                                                                                                            | No change .....1<br>Use increased while taking antidepressants .....2<br>Use decreased or stopped while taking antidepressants .....3 |

|           |                                                                                                                                      |                                                                                                                                             |
|-----------|--------------------------------------------------------------------------------------------------------------------------------------|---------------------------------------------------------------------------------------------------------------------------------------------|
| Q200_xx7  | Ecstasy (E, MDMA)                                                                                                                    | No change .....1<br>Use increased while taking<br>antidepressants .....2<br>Use decreased or stopped while<br>taking antidepressants .....3 |
| Q200_xx8  | Ketamine (Special K)                                                                                                                 | No change .....1<br>Use increased while taking<br>antidepressants .....2<br>Use decreased or stopped while<br>taking antidepressants .....3 |
| Q200_xx9  | GHB (liquid e, Fantasy)                                                                                                              | No change .....1<br>Use increased while taking<br>antidepressants .....2<br>Use decreased or stopped while<br>taking antidepressants .....3 |
| Q200_xx10 | Other party drugs                                                                                                                    | No change .....1<br>Use increased while taking<br>antidepressants .....2<br>Use decreased or stopped while<br>taking antidepressants .....3 |
| Q200_xx11 | Over-the-counter or prescription pain killers and analgesics<br>(e.g. cough medicine, Mersyndol, Panadeine, codeine,<br>hydrocodone) | No change .....1<br>Use increased while taking<br>antidepressants .....2<br>Use decreased or stopped while<br>taking antidepressants .....3 |
| Q200_xx12 | Over-the-counter or prescription stimulants (e.g. No-doz,<br>pseudoephedrine, dexamphetamine, Ritalin, diet pills)                   | No change .....1<br>Use increased while taking<br>antidepressants .....2<br>Use decreased or stopped while<br>taking antidepressants .....3 |
| Q200_xx13 | Other                                                                                                                                | No change .....1<br>Use increased while taking<br>antidepressants .....2<br>Use decreased or stopped while<br>taking antidepressants .....3 |

---

Q201 You have reached the end of this section of the questionnaire. Thanks for  
answering our questions!

---

### Module 3 – Experiences of health care

**Q202** The following questions are about your recent experiences with health services **in Australia**. Have you ever thought that you had a mental health or behavioural problem? No .....1  
Yes .....2  
Don't know .....3

\*\*\*\*\*  
IF EVER THOUGHT HAD PROBLEM (Q202 = 2) CONTINUE  
ELSE GO TO Q217  
\*\*\*\*\*

**Q203** At the time, did you think this problem might be helped by seeing a health professional? No .....1  
Yes .....2  
Don't know .....3

**Q204** Have you ever had a friend, relative or doctor suggest that you should seek help for a mental health or behavioural problem? No .....1  
Yes .....2  
Don't know .....3

\*\*\*\*\*  
IF HELP EVER SUGGESTED (Q204 = 2) CONTINUE  
ELSE GO TO Q206  
\*\*\*\*\*

**Q205** Was that in the past 12 months? No .....1  
Yes .....2  
Don't know .....3

**Q206\_n** How old were you when the mental health or behavioural problem first began? \_\_\_\_/\_\_\_\_ YEARS

**Q207** The next questions are about the mental health or behavioural problem that you have just mentioned. Have you done anything to deal with the mental health or behavioural problem? No .....1  
Yes .....2  
Don't know .....3

\*\*\*\*\*  
IF NOT DONE ANYTHING (Q207 = 1), GO TO 208  
IF DONE SOMETHING (Q207 = 2), GO TO Q209  
ELSE GO TO Q210  
\*\*\*\*\*

**Q208** Were there any reasons why you haven't done anything? No .....1  
Yes .....2  
Don't know .....3

**Q208\_TEXT** Reasons for not having done anything \_\_\_\_\_

\*\*\*\*\*  
GO TO Q210  
\*\*\*\*\*

|        |                                                                                                                                                                                                                                        |                                              |
|--------|----------------------------------------------------------------------------------------------------------------------------------------------------------------------------------------------------------------------------------------|----------------------------------------------|
| Q209   | How long have you recognised that you have had this mental health or behavioural problem?                                                                                                                                              |                                              |
|        | If 3 months or less, please record your answer in the Days field. If more than 3 months but no more than 2 years, please record your answer in the Months field. If longer than 2 years, please record your answer in the Years field. |                                              |
| Q209   | Recognition of problem time units                                                                                                                                                                                                      | Days .....1<br>Months .....2<br>Years .....3 |
| Q209_n | Number of recognition of problem time units                                                                                                                                                                                            | ___/___                                      |

---

|        |                                                                                          |                                              |
|--------|------------------------------------------------------------------------------------------|----------------------------------------------|
| Q210   | Thinking about your mental health or behavioural problem ...                             |                                              |
| Q210_1 | Have you discussed this problem with any close friends?                                  | No .....1<br>Yes .....2<br>Don't know .....3 |
| Q210_2 | Have you sought any information for this problem?                                        | No .....1<br>Yes .....2<br>Don't know .....3 |
| Q210_3 | Have you discussed your problem with family?                                             | No .....1<br>Yes .....2<br>Don't know .....3 |
| Q210_4 | Have you used or do you use any self-help strategies to help you deal with this problem? | No .....1<br>Yes .....2<br>Don't know .....3 |
| Q210_5 | Have you used alcohol or other substances to deal with this problem?                     | No .....1<br>Yes .....2<br>Don't know .....3 |
| Q210_6 | Have you seen a health professional, such as a general practitioner, about this problem? | No .....1<br>Yes .....2<br>Don't know .....3 |
| Q210_7 | Have you seen or do you see a specialist, such as a psychiatrist, about this problem?    | No .....1<br>Yes .....2<br>Don't know .....3 |
| Q210_8 | Have you done or did you do anything else to deal with this problem?                     | No .....1<br>Yes .....2<br>Don't know .....3 |

\*\*\*\*\*  
 IF ANY ACTION TAKEN (ANY OF Q210\_1 TO Q210\_8 = 2) CONTINUE  
 ELSE GO TO Q217  
 \*\*\*\*\*

---

\*\*\*\*\*  
 IF SOUGHT INFORMATION (Q210\_2 = 2) CONTINUE, ELSE GO TO Q213  
 \*\*\*\*\*

|      |                                   |       |
|------|-----------------------------------|-------|
| Q211 | What information have you sought? | _____ |
|------|-----------------------------------|-------|

---

|             |                                          |            |
|-------------|------------------------------------------|------------|
| Q212        | Where did you get this information from? |            |
| Q212_1      | Doctor                                   | Yes .....1 |
| Q212_2      | Friend / family member                   | Yes .....1 |
| Q213_3      | Book(s)                                  | Yes .....1 |
| Q213_4      | Helpline                                 | Yes .....1 |
| Q213_5      | Mental health organization               | Yes .....1 |
| Q213_6      | Community health centre                  | Yes .....1 |
| Q213_7      | Internet                                 | Yes .....1 |
| Q213_8      | Visited the library                      | Yes .....1 |
| Q213_9      | Other                                    | Yes .....1 |
| Q213_10     | Don't know                               | Yes .....1 |
| Q213_5_TEXT | Specified mental health organization     | _____      |
| Q213_9_TEXT | Specified other information source       | _____      |

\*\*\*\*\*  
 IF USED SELF-HELP STRATEGIES (Q210D = 2) CONTINUE  
 ELSE GO TO Q214  
 \*\*\*\*\*

Q213 What self-help strategies have you used? \_\_\_\_\_

\*\*\*\*\*  
 IF DID SOMETHING ELSE (Q210H = 2) CONTINUE  
 ELSE GO TO Q215  
 \*\*\*\*\*

Q214 What else did you do / have you done? \_\_\_\_\_

\*\*\*\*\*  
 FOR EACH ACTION TAKEN AT Q210 (Q210A TO Q210H = 2), COMPLETE  
 THE RELEVANT SECTION OF Q215  
 \*\*\*\*\*

|       |                                                                             |                                                                                                 |
|-------|-----------------------------------------------------------------------------|-------------------------------------------------------------------------------------------------|
| Q215  | Did you find the following helpful or unhelpful?                            |                                                                                                 |
|       | Q215A Discussing your problem with close friends                            | Helpful .....1<br>Unhelpful .....2<br>Neither helpful nor unhelpful .....3<br>Don't know .....4 |
|       | Q215B [TEXT FOR INFORMATION SOUGHT FROM Q211]                               | Helpful .....1<br>Unhelpful .....2<br>Neither helpful nor unhelpful .....3<br>Don't know .....4 |
|       | Q215C Discussing the problem with your family                               | Helpful .....1<br>Unhelpful .....2<br>Neither helpful nor unhelpful .....3<br>Don't know .....4 |
|       | Q215D [TEXT FOR SELF-HELP STRATEGY FROM Q213]                               | Helpful .....1<br>Unhelpful .....2<br>Neither helpful nor unhelpful .....3<br>Don't know .....4 |
|       | Q215E Using alcohol or other substances                                     | Helpful .....1<br>Unhelpful .....2<br>Neither helpful nor unhelpful .....3<br>Don't know .....4 |
|       | Q215F Seeing a health professional                                          | Helpful .....1<br>Unhelpful .....2<br>Neither helpful nor unhelpful .....3<br>Don't know .....4 |
|       | Q215G Seeing a specialist                                                   | Helpful .....1<br>Unhelpful .....2<br>Neither helpful nor unhelpful .....3<br>Don't know .....4 |
|       | Q215H [OTHER ACTION FROM Q214]                                              | Helpful .....1<br>Unhelpful .....2<br>Neither helpful nor unhelpful .....3<br>Don't know .....4 |
| <hr/> |                                                                             |                                                                                                 |
| Q216  | Was a parent, guardian or another adult involved in any of these processes? | No .....1<br>Yes .....2<br>Don't know .....3                                                    |
| <hr/> |                                                                             |                                                                                                 |
| Q217  | Another section of the questionnaire completed. Well done!                  |                                                                                                 |
| <hr/> |                                                                             |                                                                                                 |



## Module 4 – Thoughts, feelings and behaviours

Q218 Please answer each question by choosing Yes or No. There are no right or wrong answers, and no trick questions. Work quickly and do not think too long about the exact meaning of the questions.

|                                                                             |            |
|-----------------------------------------------------------------------------|------------|
| Q218A Does your mood often go up and down?                                  | No .....1  |
|                                                                             | Yes .....2 |
| Q218B Are you a talkative person?                                           | No .....1  |
|                                                                             | Yes .....2 |
| Q218C Do you ever feel 'just miserable' for no reason?                      | No .....1  |
|                                                                             | Yes .....2 |
| Q218D Are you rather lively?                                                | No .....1  |
|                                                                             | Yes .....2 |
| Q218E Are you an irritable person?                                          | No .....1  |
|                                                                             | Yes .....2 |
| Q218F Do you enjoy meeting new people?                                      | No .....1  |
|                                                                             | Yes .....2 |
| Q218G Are your feelings easily hurt?                                        | No .....1  |
|                                                                             | Yes .....2 |
| Q218H Can you usually let yourself go and enjoy yourself at a lively party? | No .....1  |
|                                                                             | Yes .....2 |
| Q218I Do you often feel 'fed-up'?                                           | No .....1  |
|                                                                             | Yes .....2 |
| Q218J Do you usually take the initiative in making new friends?             | No .....1  |
|                                                                             | Yes .....2 |
| Q218K Would you call yourself a nervous person?                             | No .....1  |
|                                                                             | Yes .....2 |
| Q218L Can you easily get some life into a rather dull party?                | No .....1  |
|                                                                             | Yes .....2 |

---

Q219 Please answer each question by choosing Yes or No. There are no right or wrong answers, and no trick questions. Work quickly and do not think too long about the exact meaning of the questions.

|                                                                  |           |   |
|------------------------------------------------------------------|-----------|---|
| Q219A Are you a worrier?                                         | No .....  | 1 |
|                                                                  | Yes ..... | 2 |
| Q219B Do you tend to keep in the background on social occasions? | No .....  | 1 |
|                                                                  | Yes ..... | 2 |
| Q219C Would you call yourself tense or "highly-strung"?          | No .....  | 1 |
|                                                                  | Yes ..... | 2 |
| Q219D Do you like mixing with people?                            | No .....  | 1 |
|                                                                  | Yes ..... | 2 |
| Q219E Do you worry too long after an embarrassing experience?    | No .....  | 1 |
|                                                                  | Yes ..... | 2 |
| Q219F Do you like plenty of bustle and excitement around you?    | No .....  | 1 |
|                                                                  | Yes ..... | 2 |
| Q219G Do you suffer from "nerves"?                               | No .....  | 1 |
|                                                                  | Yes ..... | 2 |
| Q219H Are you mostly quiet when you are with other people?       | No .....  | 1 |
|                                                                  | Yes ..... | 2 |
| Q219I Do you often feel lonely?                                  | No .....  | 1 |
|                                                                  | Yes ..... | 2 |
| Q219J Do other people think of you as being very lively?         | No .....  | 1 |
|                                                                  | Yes ..... | 2 |
| Q219K Are you often troubled by feelings of guilt?               | No .....  | 1 |
|                                                                  | Yes ..... | 2 |
| Q219L Can you get a party going?                                 | No .....  | 1 |
|                                                                  | Yes ..... | 2 |

---

|       |                                                                                                                                                                                                                     |                                                                                               |
|-------|---------------------------------------------------------------------------------------------------------------------------------------------------------------------------------------------------------------------|-----------------------------------------------------------------------------------------------|
| Q220  | The following items refer to experiences that many people have in their everyday lives. Choose the answer that best describes how much that experience has <b>distressed or bothered</b> you during the past month. |                                                                                               |
| Q220A | I have saved up so many things that they get in the way                                                                                                                                                             | Not at all .....1<br>A little .....2<br>Moderately .....3<br>A lot .....4<br>Extremely .....5 |
| Q220B | I check things more often than necessary                                                                                                                                                                            | Not at all .....1<br>A little .....2<br>Moderately .....3<br>A lot .....4<br>Extremely .....5 |
| Q220C | I get upset if objects are not arranged properly                                                                                                                                                                    | Not at all .....1<br>A little .....2<br>Moderately .....3<br>A lot .....4<br>Extremely .....5 |
| Q220D | I feel compelled to count while I am doing things                                                                                                                                                                   | Not at all .....1<br>A little .....2<br>Moderately .....3<br>A lot .....4<br>Extremely .....5 |
| Q220E | I find it difficult to touch an object when I know it has been touched by strangers or certain people                                                                                                               | Not at all .....1<br>A little .....2<br>Moderately .....3<br>A lot .....4<br>Extremely .....5 |
| Q220F | I find it difficult to control my own thoughts                                                                                                                                                                      | Not at all .....1<br>A little .....2<br>Moderately .....3<br>A lot .....4<br>Extremely .....5 |
| Q220G | I collect things I don't need                                                                                                                                                                                       | Not at all .....1<br>A little .....2<br>Moderately .....3<br>A lot .....4<br>Extremely .....5 |
| Q220H | I repeatedly check doors, windows, drawers etc.                                                                                                                                                                     | Not at all .....1<br>A little .....2<br>Moderately .....3<br>A lot .....4<br>Extremely .....5 |
| Q220I | I get upset if others change the way I have arranged things                                                                                                                                                         | Not at all .....1<br>A little .....2<br>Moderately .....3<br>A lot .....4<br>Extremely .....5 |

|                                                                                                                                                                                                                          |                                                                                               |
|--------------------------------------------------------------------------------------------------------------------------------------------------------------------------------------------------------------------------|-----------------------------------------------------------------------------------------------|
| Q221 The following items refer to experiences that many people have in their everyday lives. Choose the answer that best describes how much that experience has <b>distressed or bothered</b> you during the past month. |                                                                                               |
| Q221A I feel I have to repeat certain numbers                                                                                                                                                                            | Not at all .....1<br>A little .....2<br>Moderately .....3<br>A lot .....4<br>Extremely .....5 |
| Q221B I sometimes have to wash or clean myself simply because I feel contaminated                                                                                                                                        | Not at all .....1<br>A little .....2<br>Moderately .....3<br>A lot .....4<br>Extremely .....5 |
| Q221C I am upset by unpleasant thoughts that come into my mind against my will                                                                                                                                           | Not at all .....1<br>A little .....2<br>Moderately .....3<br>A lot .....4<br>Extremely .....5 |
| Q221D I avoid throwing things away because I am afraid I might need them later                                                                                                                                           | Not at all .....1<br>A little .....2<br>Moderately .....3<br>A lot .....4<br>Extremely .....5 |
| Q221E I repeatedly check gas and water taps and light switches after turning them off                                                                                                                                    | Not at all .....1<br>A little .....2<br>Moderately .....3<br>A lot .....4<br>Extremely .....5 |
| Q221F I need things to be arranged in a particular order                                                                                                                                                                 | Not at all .....1<br>A little .....2<br>Moderately .....3<br>A lot .....4<br>Extremely .....5 |
| Q221G I feel that there are good and bad numbers                                                                                                                                                                         | Not at all .....1<br>A little .....2<br>Moderately .....3<br>A lot .....4<br>Extremely .....5 |
| Q221H I wash my hands more often and longer than necessary                                                                                                                                                               | Not at all .....1<br>A little .....2<br>Moderately .....3<br>A lot .....4<br>Extremely .....5 |
| Q221I I frequently get nasty thoughts and have difficulty getting rid of them                                                                                                                                            | Not at all .....1<br>A little .....2<br>Moderately .....3<br>A lot .....4<br>Extremely .....5 |

|       |                                                                                                                                                                                         |                                                                                                 |
|-------|-----------------------------------------------------------------------------------------------------------------------------------------------------------------------------------------|-------------------------------------------------------------------------------------------------|
| Q222  | Read each statement and decide if it is an accurate statement about you. Mark your answer next to each statement. Give your own opinion of yourself. Be sure to answer every statement. |                                                                                                 |
| Q222A | My mood can shift quite suddenly                                                                                                                                                        | False, not at all true .....1<br>Slightly true .....2<br>Mainly true .....3<br>Very true .....4 |
| Q222B | I avoid eye contact with other people                                                                                                                                                   | False, not at all true .....1<br>Slightly true .....2<br>Mainly true .....3<br>Very true .....4 |
| Q222C | My attitude about myself changes a lot                                                                                                                                                  | False, not at all true .....1<br>Slightly true .....2<br>Mainly true .....3<br>Very true .....4 |
| Q222D | I have difficulty making friends, even when trying my best                                                                                                                              | False, not at all true .....1<br>Slightly true .....2<br>Mainly true .....3<br>Very true .....4 |
| Q222E | My relationships have been stormy                                                                                                                                                       | False, not at all true .....1<br>Slightly true .....2<br>Mainly true .....3<br>Very true .....4 |
| Q222F | I am sometimes regarded by other people as odd or weird                                                                                                                                 | False, not at all true .....1<br>Slightly true .....2<br>Mainly true .....3<br>Very true .....4 |
| Q222G | My moods get quite intense                                                                                                                                                              | False, not at all true .....1<br>Slightly true .....2<br>Mainly true .....3<br>Very true .....4 |
| Q222H | I have trouble keeping up with the flow of a normal conversation                                                                                                                        | False, not at all true .....1<br>Slightly true .....2<br>Mainly true .....3<br>Very true .....4 |
| Q222I | Sometimes I feel terribly empty inside                                                                                                                                                  | False, not at all true .....1<br>Slightly true .....2<br>Mainly true .....3<br>Very true .....4 |
| Q222J | I have difficulty relating to peers                                                                                                                                                     | False, not at all true .....1<br>Slightly true .....2<br>Mainly true .....3<br>Very true .....4 |
| Q222K | I want to let certain people know how much they've hurt me                                                                                                                              | False, not at all true .....1<br>Slightly true .....2<br>Mainly true .....3<br>Very true .....4 |
| Q222L | Compared to others I have a restricted or unusually narrow range of interests                                                                                                           | False, not at all true .....1<br>Slightly true .....2<br>Mainly true .....3<br>Very true .....4 |

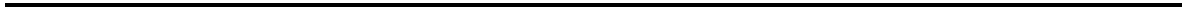

|       |                                                                                                                                                                                         |                                                                                                 |
|-------|-----------------------------------------------------------------------------------------------------------------------------------------------------------------------------------------|-------------------------------------------------------------------------------------------------|
| Q223  | Read each statement and decide if it is an accurate statement about you. Mark your answer next to each statement. Give your own opinion of yourself. Be sure to answer every statement. |                                                                                                 |
| Q223A | My mood is very steady                                                                                                                                                                  | False, not at all true .....1<br>Slightly true .....2<br>Mainly true .....3<br>Very true .....4 |
| Q223B | I have trouble understanding the meaning of other people's tone of voice and facial expressions                                                                                         | False, not at all true .....1<br>Slightly true .....2<br>Mainly true .....3<br>Very true .....4 |
| Q223C | I worry a lot about other people leaving me                                                                                                                                             | False, not at all true .....1<br>Slightly true .....2<br>Mainly true .....3<br>Very true .....4 |
| Q223D | I have trouble concentrating too much on parts of things rather than seeing the whole picture                                                                                           | False, not at all true .....1<br>Slightly true .....2<br>Mainly true .....3<br>Very true .....4 |
| Q223E | People once close to me have let me down                                                                                                                                                | False, not at all true .....1<br>Slightly true .....2<br>Mainly true .....3<br>Very true .....4 |
| Q223F | I would rather be alone than with others                                                                                                                                                | False, not at all true .....1<br>Slightly true .....2<br>Mainly true .....3<br>Very true .....4 |
| Q223G | I have little control over my anger                                                                                                                                                     | False, not at all true .....1<br>Slightly true .....2<br>Mainly true .....3<br>Very true .....4 |
| Q223H | I have more difficulty than others do with changes in routine                                                                                                                           | False, not at all true .....1<br>Slightly true .....2<br>Mainly true .....3<br>Very true .....4 |
| Q223I | I often wonder what I should do with my life                                                                                                                                            | False, not at all true .....1<br>Slightly true .....2<br>Mainly true .....3<br>Very true .....4 |
| Q223J | I am (or used to be) overly sensitive to sounds, textures or smells                                                                                                                     | False, not at all true .....1<br>Slightly true .....2<br>Mainly true .....3<br>Very true .....4 |
| Q223K | I rarely feel very lonely                                                                                                                                                               | False, not at all true .....1<br>Slightly true .....2<br>Mainly true .....3<br>Very true .....4 |
| Q223L | I frequently make careless mistakes                                                                                                                                                     | False, not at all true .....1<br>Slightly true .....2<br>Mainly true .....3<br>Very true .....4 |

---

|       |                                                                                                                                                                                         |                                                                                                     |
|-------|-----------------------------------------------------------------------------------------------------------------------------------------------------------------------------------------|-----------------------------------------------------------------------------------------------------|
| Q224  | Read each statement and decide if it is an accurate statement about you. Mark your answer next to each statement. Give your own opinion of yourself. Be sure to answer every statement. |                                                                                                     |
| Q224A | I sometimes do things so impulsively that I get into trouble                                                                                                                            | False, not at all true ..... 1<br>Slightly true ..... 2<br>Mainly true ..... 3<br>Very true ..... 4 |
| Q224B | I have difficulty keeping my attention on tasks that don't interest me                                                                                                                  | False, not at all true ..... 1<br>Slightly true ..... 2<br>Mainly true ..... 3<br>Very true ..... 4 |
| Q224C | I've always been a pretty happy person                                                                                                                                                  | False, not at all true ..... 1<br>Slightly true ..... 2<br>Mainly true ..... 3<br>Very true ..... 4 |
| Q224D | People tell me that I don't listen when others are talking                                                                                                                              | False, not at all true ..... 1<br>Slightly true ..... 2<br>Mainly true ..... 3<br>Very true ..... 4 |
| Q224E | I can't handle separation from those close to me very well                                                                                                                              | False, not at all true ..... 1<br>Slightly true ..... 2<br>Mainly true ..... 3<br>Very true ..... 4 |
| Q224F | I have difficulty finishing projects or assignments (hobbies or work)                                                                                                                   | False, not at all true ..... 1<br>Slightly true ..... 2<br>Mainly true ..... 3<br>Very true ..... 4 |
| Q224G | I've made some real mistakes in the people I've picked as friends                                                                                                                       | False, not at all true ..... 1<br>Slightly true ..... 2<br>Mainly true ..... 3<br>Very true ..... 4 |
| Q224H | I have difficulty staying organised at work or home                                                                                                                                     | False, not at all true ..... 1<br>Slightly true ..... 2<br>Mainly true ..... 3<br>Very true ..... 4 |
| Q224I | When I'm upset, I typically do something to hurt myself                                                                                                                                 | False, not at all true ..... 1<br>Slightly true ..... 2<br>Mainly true ..... 3<br>Very true ..... 4 |
| Q224J | I have difficulty with projects that require sustained mental effort                                                                                                                    | False, not at all true ..... 1<br>Slightly true ..... 2<br>Mainly true ..... 3<br>Very true ..... 4 |
| Q224K | I've had times when I was so mad I couldn't do enough to express my anger                                                                                                               | False, not at all true ..... 1<br>Slightly true ..... 2<br>Mainly true ..... 3<br>Very true ..... 4 |

---



|       |                                                                                                                                                                                         |                                                                                                 |
|-------|-----------------------------------------------------------------------------------------------------------------------------------------------------------------------------------------|-------------------------------------------------------------------------------------------------|
| Q225  | Read each statement and decide if it is an accurate statement about you. Mark your answer next to each statement. Give your own opinion of yourself. Be sure to answer every statement. |                                                                                                 |
| Q225A | I frequently lose things (like pencils or my car keys)                                                                                                                                  | False, not at all true .....1<br>Slightly true .....2<br>Mainly true .....3<br>Very true .....4 |
| Q225B | I don't get bored very easily                                                                                                                                                           | False, not at all true .....1<br>Slightly true .....2<br>Mainly true .....3<br>Very true .....4 |
| Q225C | I am easily distracted                                                                                                                                                                  | False, not at all true .....1<br>Slightly true .....2<br>Mainly true .....3<br>Very true .....4 |
| Q225D | Once someone is my friend, we stay friends                                                                                                                                              | False, not at all true .....1<br>Slightly true .....2<br>Mainly true .....3<br>Very true .....4 |
| Q225E | Compared to others I am forgetful                                                                                                                                                       | False, not at all true .....1<br>Slightly true .....2<br>Mainly true .....3<br>Very true .....4 |
| Q225F | I'm too impulsive for my own good                                                                                                                                                       | False, not at all true .....1<br>Slightly true .....2<br>Mainly true .....3<br>Very true .....4 |
| Q225G | I tend to blurt out answers or comments                                                                                                                                                 | False, not at all true .....1<br>Slightly true .....2<br>Mainly true .....3<br>Very true .....4 |
| Q225H | I spend money too easily                                                                                                                                                                | False, not at all true .....1<br>Slightly true .....2<br>Mainly true .....3<br>Very true .....4 |
| Q225I | I have difficulty waiting my turn                                                                                                                                                       | False, not at all true .....1<br>Slightly true .....2<br>Mainly true .....3<br>Very true .....4 |
| Q225J | I'm a reckless person                                                                                                                                                                   | False, not at all true .....1<br>Slightly true .....2<br>Mainly true .....3<br>Very true .....4 |
| Q225K | People tell me that I frequently interrupt                                                                                                                                              | False, not at all true .....1<br>Slightly true .....2<br>Mainly true .....3<br>Very true .....4 |
| Q225L | I'm careful about how I spend my money                                                                                                                                                  | False, not at all true .....1<br>Slightly true .....2<br>Mainly true .....3<br>Very true .....4 |

---

Q226 The next questions are about how you feel about different aspects of your life. For each one, mark how often you feel that way.

Q226A How often do you feel that you lack companionship?      Hardly ever .....1  
Some of the time .....2  
Often .....3

Q226B How often do you feel left out?      Hardly ever .....1  
Some of the time .....2  
Often .....3

Q226C How often do you feel isolated from others?      Hardly ever .....1  
Some of the time .....2  
Often .....3

---

Q227 You've now finished this section of the questionnaire too. Great work!

---

## Module 5 – Life Events

Q228 This section of the questionnaire contains a number of questions about events you may have experienced during your life, including some that may have been traumatic or that may be upsetting to think about. If you find any of these questions upsetting, please feel free to skip them. If the questions cause you distress, you may find it helpful to talk to a Lifeline counsellor. Lifeline have telephone counsellors, available 24 hours a day, who are trained and have experience talking with people who are having difficulties. Even more importantly, the counsellors can give you ideas about where and how to get further help. Contact details for Lifeline are below. You may like to write them down before we continue.  
 PHONE NUMBER FOR LIFELINE: 13 11 14  
 WEBSITE: [www.lifeline.org.au](http://www.lifeline.org.au)

---

|      |                                     |                  |   |
|------|-------------------------------------|------------------|---|
| Q229 | Do you have a romantic partner now? | No .....         | 1 |
|      |                                     | Yes .....        | 2 |
|      |                                     | Don't know ..... | 3 |

---

|      |                                                        |                  |   |
|------|--------------------------------------------------------|------------------|---|
| Q230 | Have you had a romantic partner in the last 12 months? | No .....         | 1 |
|      |                                                        | Yes .....        | 2 |
|      |                                                        | Don't know ..... | 3 |

---

Q231 Have you had any serious problems getting along with any of the following individuals during the past 12 months?

|       |                                                                  |           |   |
|-------|------------------------------------------------------------------|-----------|---|
| Q231A | Your partner (IF Q229 = 2 OR Q230 = 2)                           | No .....  | 1 |
|       |                                                                  | Yes ..... | 2 |
| Q231B | Other family member                                              | No .....  | 1 |
|       |                                                                  | Yes ..... | 2 |
| Q231C | A close friend                                                   | No .....  | 1 |
|       |                                                                  | Yes ..... | 2 |
| Q231D | A neighbour                                                      | No .....  | 1 |
|       |                                                                  | Yes ..... | 2 |
| Q231E | Someone living with you (e.g. child, flatmate or elderly parent) | No .....  | 1 |
|       |                                                                  | Yes ..... | 2 |
| Q231F | A workmate/co-worker                                             | No .....  | 1 |
|       |                                                                  | Yes ..... | 2 |

---

|       |                                                                                                         |                                                                                              |
|-------|---------------------------------------------------------------------------------------------------------|----------------------------------------------------------------------------------------------|
| Q232  | If you have a partner, please judge your partner's attitudes and behaviour towards you in recent times. |                                                                                              |
| Q232A | Is very loving to me                                                                                    | Very true .....1<br>Moderately true .....2<br>Somewhat true .....3<br>Not at all true .....4 |
| Q232B | Is a good companion                                                                                     | Very true .....1<br>Moderately true .....2<br>Somewhat true .....3<br>Not at all true .....4 |
| Q232C | Is affectionate to me                                                                                   | Very true .....1<br>Moderately true .....2<br>Somewhat true .....3<br>Not at all true .....4 |
| Q232D | Is very considerate of me                                                                               | Very true .....1<br>Moderately true .....2<br>Somewhat true .....3<br>Not at all true .....4 |
| Q232E | Is fun to be with                                                                                       | Very true .....1<br>Moderately true .....2<br>Somewhat true .....3<br>Not at all true .....4 |
| Q232F | Shows his/her appreciation of me                                                                        | Very true .....1<br>Moderately true .....2<br>Somewhat true .....3<br>Not at all true .....4 |
| Q232G | Understands my problems and worries                                                                     | Very true .....1<br>Moderately true .....2<br>Somewhat true .....3<br>Not at all true .....4 |
| Q232H | Confides closely in me                                                                                  | Very true .....1<br>Moderately true .....2<br>Somewhat true .....3<br>Not at all true .....4 |
| Q232I | Makes me feel needed                                                                                    | Very true .....1<br>Moderately true .....2<br>Somewhat true .....3<br>Not at all true .....4 |
| Q232J | Is physically gentle and considerate                                                                    | Very true .....1<br>Moderately true .....2<br>Somewhat true .....3<br>Not at all true .....4 |

---

|       |                                                                                                 |                                                                                          |
|-------|-------------------------------------------------------------------------------------------------|------------------------------------------------------------------------------------------|
| Q233  | And, some questions about your relationships with people close to you and your social networks  |                                                                                          |
|       | Q233A If you get angry or upset do you have people you can tell just how you feel?              | No .....1<br>Yes, with one or two people .....2<br>Yes, with more than two people .....3 |
|       | Q233B Recently have you had any fights or arguments with people close to you?                   | No .....1<br>Yes, with one or two people .....2<br>Yes, with more than two people .....3 |
| <hr/> |                                                                                                 |                                                                                          |
| Q234  |                                                                                                 |                                                                                          |
|       | Q234A Are you a member of any social club or sporting group?                                    | No .....1<br>Yes .....2<br>Yes, sort of .....3                                           |
|       | Q234B Are you currently in a relationship?                                                      | No .....1<br>Yes .....2<br>Yes, sort of .....3                                           |
|       | Q234C Do you have someone you can trust with your private thoughts and feelings?                | No .....1<br>Yes .....2<br>Yes, sort of .....3                                           |
|       | Q234D If you're having a tough time, do you have someone you can really depend on?              | No .....1<br>Yes .....2<br>Yes, sort of .....3                                           |
|       | Q234E Is there anyone who really knows you very well (e.g. understands how you think and feel)? | No .....1<br>Yes .....2<br>Yes, sort of .....3                                           |
|       | Q234F Is there anyone you feel close to that understands your concerns / difficulties?          | No .....1<br>Yes .....2<br>Yes, sort of .....3                                           |
|       | Q234G Is there anyone you feel you can turn to, if in trouble or a crisis?                      | No .....1<br>Yes .....2<br>Yes, sort of .....3                                           |
|       | Q234H When you feel happy do you have someone you can share this with?                          | No .....1<br>Yes .....2<br>Yes, sort of .....3                                           |
| <hr/> |                                                                                                 |                                                                                          |

## Q235

|                                                                                                   |                                                                          |
|---------------------------------------------------------------------------------------------------|--------------------------------------------------------------------------|
| Q235A Does it seem that your family and friends (people who are important to you) understand you? | Hardly ever .....1<br>Some of the time .....2<br>Most of the time .....3 |
| Q235B Do you feel useful to your family and friends (people important to you)?                    | Hardly ever .....1<br>Some of the time .....2<br>Most of the time .....3 |
| Q235C Do you know what is going on with your family and friends?                                  | Hardly ever .....1<br>Some of the time .....2<br>Most of the time .....3 |
| Q235D When you are talking with your family and friends, do you feel you are being listened to?   | Hardly ever .....1<br>Some of the time .....2<br>Most of the time .....3 |
| Q235E Do you feel you have a definite role or place in your family and among your friends?        | Hardly ever .....1<br>Some of the time .....2<br>Most of the time .....3 |
| Q235F Can you talk about your deepest problems with at least some of your family and friends?     | Hardly ever .....1<br>Some of the time .....2<br>Most of the time .....3 |

## Q236 How often do friends and/or family ...

|                                              |                                                                   |
|----------------------------------------------|-------------------------------------------------------------------|
| Q236A Create tensions or arguments with you? | Never .....1<br>Rarely .....2<br>Sometimes .....3<br>Often .....4 |
| Q236B Criticise you?                         | Never .....1<br>Rarely .....2<br>Sometimes .....3<br>Often .....4 |
| Q236C Express interest in how you are doing? | Never .....1<br>Rarely .....2<br>Sometimes .....3<br>Often .....4 |
| Q236D Make too many demands on you?          | Never .....1<br>Rarely .....2<br>Sometimes .....3<br>Often .....4 |
| Q236E Make you feel cared for?               | Never .....1<br>Rarely .....2<br>Sometimes .....3<br>Often .....4 |

|                                                                                                              |                                                                  |
|--------------------------------------------------------------------------------------------------------------|------------------------------------------------------------------|
| Q237 Other than members of your family, how many people do you feel you can depend on or feel very close to? | None .....1<br>1 to 2 people .....2<br>More than 2 people .....3 |
|--------------------------------------------------------------------------------------------------------------|------------------------------------------------------------------|

|       |                                                                                                                                           |                                                                                                      |
|-------|-------------------------------------------------------------------------------------------------------------------------------------------|------------------------------------------------------------------------------------------------------|
| Q238  | And, thinking specifically about your family and friends, about how many times in the past week (excluding time spent at school or work): |                                                                                                      |
| Q238A | Did you spend time with someone who doesn't live with you (e.g. went to see them or they came to visit you, or you went out together)?    | 0 .....1<br>1 .....2<br>2 .....3<br>3 .....4<br>4 .....5<br>5 .....6<br>6 .....7<br>7 or more .....8 |
| Q238B | Did you talk to someone (friends, relatives or others) on the telephone?                                                                  | 0 .....1<br>1 .....2<br>2 .....3<br>3 .....4<br>4 .....5<br>5 .....6<br>6 .....7<br>7 or more .....8 |
| Q238C | Did you go to meetings of clubs, religious meetings, or other groups of which you're a member?                                            | 0 .....1<br>1 .....2<br>2 .....3<br>3 .....4<br>4 .....5<br>5 .....6<br>6 .....7<br>7 or more .....8 |
| Q238D | Did you use the internet to spend time with someone, talk with someone, or attend club / group meetings?                                  | 0 .....1<br>1 .....2<br>2 .....3<br>3 .....4<br>4 .....5<br>5 .....6<br>6 .....7<br>7 or more .....8 |

---

|      |                                                                   |                         |
|------|-------------------------------------------------------------------|-------------------------|
| Q239 | During the past 12 months have you had any of these events occur? |                         |
|      | Q239A Divorce                                                     | No .....1<br>Yes .....2 |
|      | Q239B Marital separation                                          | No .....1<br>Yes .....2 |
|      | Q239C Broken engagement or steady relationship                    | No .....1<br>Yes .....2 |
|      | Q239D Separation from other loved one or close friend             | No .....1<br>Yes .....2 |
|      | Q239E Serious illness or injury                                   | No .....1<br>Yes .....2 |
|      | Q239F Serious accident (not involving personal injury)            | No .....1<br>Yes .....2 |
|      | Q239G Burgled or robbed                                           | No .....1<br>Yes .....2 |
|      | Q239H Laid off or sacked from job                                 | No .....1<br>Yes .....2 |
|      | Q239I Other serious difficulties at work                          | No .....1<br>Yes .....2 |
|      | Q239J Major financial problems                                    | No .....1<br>Yes .....2 |
|      | Q239K Legal troubles or involvement with police                   | No .....1<br>Yes .....2 |
|      | Q239L Living in unpleasant surroundings                           | No .....1<br>Yes .....2 |

---



- Q472 The next series of questions will ask you about events you may have experienced during your life, including some that may have been traumatic or that may be upsetting to think about. If you find any of these questions upsetting, please feel free to skip them.

If the questions cause you distress, you may find it helpful to talk to a Lifeline counsellor. Lifeline have telephone counsellors, available 24 hours a day, who are trained and have experience talking with people who are having difficulties. Even more importantly, the counsellors can give you ideas about where and how to get further help.

Contact details for Lifeline are below. You may like to write them down before we continue.

PHONE NUMBER

FOR LIFELINE:

13 11 14

WEBSITE: [www.lifeline.org.au](http://www.lifeline.org.au)

- Q240 Listed below are a number of difficult or stressful things that sometimes happen to people. For each event mark one or more of the boxes to the right to indicate that: (a) it happened to you personally; (b) you witnessed it happen to someone else; (c) you learned about it happening to a close family member or close friend; (d) you were exposed to it as part of your job (for example, paramedic, police, military or other first responder); (e) you're not sure if it fits; or (f) it doesn't apply to you. Be sure to consider your entire life (growing up as well as adulthood) as you go through the list of events.

|                                                                                            |                                                                                                                                             |
|--------------------------------------------------------------------------------------------|---------------------------------------------------------------------------------------------------------------------------------------------|
| Q240A Natural disaster (e.g. flood, cyclone, tornado, earthquake)                          | Happened to me .....1<br>Witnessed it .....2<br>Learned about it .....3<br>Part of my job .....4<br>Not sure .....5<br>Doesn't apply .....6 |
| Q240B Fire or explosion                                                                    | Happened to me .....1<br>Witnessed it .....2<br>Learned about it .....3<br>Part of my job .....4<br>Not sure .....5<br>Doesn't apply .....6 |
| Q240C Transportation accident (e.g. car accident, boat accident, train wreck, plane crash) | Happened to me .....1<br>Witnessed it .....2<br>Learned about it .....3<br>Part of my job .....4<br>Not sure .....5<br>Doesn't apply .....6 |
| Q240D Serious accident at work, home or during recreational activity                       | Happened to me .....1<br>Witnessed it .....2<br>Learned about it .....3<br>Part of my job .....4<br>Not sure .....5<br>Doesn't apply .....6 |
| Q240E Exposure to toxic substances (e.g. dangerous chemicals, radiation)                   | Happened to me .....1<br>Witnessed it .....2<br>Learned about it .....3<br>Part of my job .....4<br>Not sure .....5                         |

|                                                                                                                     |                                                                                                                                             |
|---------------------------------------------------------------------------------------------------------------------|---------------------------------------------------------------------------------------------------------------------------------------------|
|                                                                                                                     | Doesn't apply .....6                                                                                                                        |
| Q240F Physical assault (e.g. being attacked, hit, slapped, kicked, beaten up)                                       | Happened to me .....1<br>Witnessed it .....2<br>Learned about it .....3<br>Part of my job .....4<br>Not sure .....5<br>Doesn't apply .....6 |
| Q240G Assault with a weapon (e.g. being shot, stabbed, threatened with a knife, gun, bomb)                          | Happened to me .....1<br>Witnessed it .....2<br>Learned about it .....3<br>Part of my job .....4<br>Not sure .....5<br>Doesn't apply .....6 |
| Q240H Sexual assault (rape, attempted rape, made to perform any type of sexual act through force or threat of harm) | Happened to me .....1<br>Witnessed it .....2<br>Learned about it .....3<br>Part of my job .....4<br>Not sure .....5<br>Doesn't apply .....6 |
| Q240I Other unwanted or uncomfortable sexual experience                                                             | Happened to me .....1<br>Witnessed it .....2<br>Learned about it .....3<br>Part of my job .....4<br>Not sure .....5<br>Doesn't apply .....6 |
| Q240J Combat or exposure to a war-zone (in the military or as a civilian)                                           | Happened to me .....1<br>Witnessed it .....2<br>Learned about it .....3<br>Part of my job .....4<br>Not sure .....5<br>Doesn't apply .....6 |
| Q240K Captivity (e.g. being kidnapped, abducted, held hostage, prisoner of war)                                     | Happened to me .....1<br>Witnessed it .....2<br>Learned about it .....3<br>Part of my job .....4<br>Not sure .....5<br>Doesn't apply .....6 |
| Q240L Life-threatening illness or injury                                                                            | Happened to me .....1<br>Witnessed it .....2<br>Learned about it .....3<br>Part of my job .....4<br>Not sure .....5<br>Doesn't apply .....6 |
| Q240M Severe human suffering                                                                                        | Happened to me .....1<br>Witnessed it .....2<br>Learned about it .....3<br>Part of my job .....4<br>Not sure .....5<br>Doesn't apply .....6 |
| Q240N Sudden violent death (e.g. homicide, suicide)                                                                 | Happened to me .....1<br>Witnessed it .....2<br>Learned about it .....3<br>Part of my job .....4<br>Not sure .....5                         |

|                                                                |                                                                                                                                             |
|----------------------------------------------------------------|---------------------------------------------------------------------------------------------------------------------------------------------|
|                                                                | Doesn't apply .....6                                                                                                                        |
| Q240O Sudden accidental death                                  | Happened to me .....1<br>Witnessed it .....2<br>Learned about it .....3<br>Part of my job .....4<br>Not sure .....5<br>Doesn't apply .....6 |
| Q240P Serious injury, harm or death you caused to someone else | Happened to me .....1<br>Witnessed it .....2<br>Learned about it .....3<br>Part of my job .....4<br>Not sure .....5<br>Doesn't apply .....6 |
| Q240Q Any other very stressful event or experience             | Happened to me .....1<br>Witnessed it .....2<br>Learned about it .....3<br>Part of my job .....4<br>Not sure .....5<br>Doesn't apply .....6 |

\*\*\*\*\*  
 IF ANY EVENT (Q240A TO Q240Q = 1, 2, 3 OR 4), CONTINUE  
 ELSE GO TO Q244  
 \*\*\*\*\*

---

|       |                                                                                                                                                                                                                |                                          |
|-------|----------------------------------------------------------------------------------------------------------------------------------------------------------------------------------------------------------------|------------------------------------------|
| Q241  | Sometimes images or strong memories of traumatic events keep coming back in flashbacks, thoughts that you can't get rid of, or repeated nightmares. Has that ever happened to you?                             | No .....1<br>Yes .....2                  |
| Q242  | Did you make a special effort to avoid thinking or talking about what happened or deliberately stayed away from things or people that reminded you of the terrible experience?                                 | No .....1<br>Yes .....2                  |
| Q243  | After this experience did you have trouble sleeping, have difficulty concentrating, have outbursts of anger, feel overly watchful or on guard, or were you unusually irritable, very jumpy or easily startled? | No .....1<br>Yes .....2                  |
| Q244  | People may experience stressful situations in childhood which may affect their future health and well-being. Please indicate if you experienced any of these situations during your childhood.                 |                                          |
| Q244A | Emotional abuse (e.g. often being told you were no good, yelled at in a scary way, threatened, ignored, or stopped from making friends)                                                                        | No .....1<br>Yes .....2<br>Unsure .....3 |
| Q244B | Emotional neglect (e.g. often not being shown affection, or not being given encouragement or support)                                                                                                          | No .....1<br>Yes .....2<br>Unsure .....3 |
| Q244C | Physical neglect (e.g. often not being given enough to eat or drink, appropriate clothing, shelter, medical care, education, supervision or a safe home environment)                                           | No .....1<br>Yes .....2<br>Unsure .....3 |

---

\*\*\*\*\*  
 IF ANY EVENT (Q240A TO Q240Q = 1, 2, 3 OR 4 OR Q244A TO Q244C = 2),  
 COMPLETE THE RELEVANT SECTION OF Q245  
 ELSE GO TO Q246  
 \*\*\*\*\*

|       |                                                                                                                                                         |            |                    |
|-------|---------------------------------------------------------------------------------------------------------------------------------------------------------|------------|--------------------|
| Q245  | How old were you the first and last time these things happened? If something happened only once, please enter the same age for the first and last time. |            |                    |
| Q245A | Natural disaster                                                                                                                                        | First time | __/__ AGE IN YEARS |
|       |                                                                                                                                                         | Last time  | __/__ AGE IN YEARS |
| Q245B | Fire or explosion                                                                                                                                       | First time | __/__ AGE IN YEARS |
|       |                                                                                                                                                         | Last time  | __/__ AGE IN YEARS |
| Q245C | Transportation accident                                                                                                                                 | First time | __/__ AGE IN YEARS |
|       |                                                                                                                                                         | Last time  | __/__ AGE IN YEARS |
| Q245D | Serious accident                                                                                                                                        | First time | __/__ AGE IN YEARS |
|       |                                                                                                                                                         | Last time  | __/__ AGE IN YEARS |
| Q245E | Exposure to toxic substance                                                                                                                             | First time | __/__ AGE IN YEARS |
|       |                                                                                                                                                         | Last time  | __/__ AGE IN YEARS |
| Q245F | Physical assault                                                                                                                                        | First time | __/__ AGE IN YEARS |
|       |                                                                                                                                                         | Last time  | __/__ AGE IN YEARS |
| Q245G | Assault with a weapon                                                                                                                                   | First time | __/__ AGE IN YEARS |
|       |                                                                                                                                                         | Last time  | __/__ AGE IN YEARS |
| Q245H | Sexual assault                                                                                                                                          | First time | __/__ AGE IN YEARS |
|       |                                                                                                                                                         | Last time  | __/__ AGE IN YEARS |
| Q245I | Other unwanted or uncomfortable sexual experience                                                                                                       | First time | __/__ AGE IN YEARS |
|       |                                                                                                                                                         | Last time  | __/__ AGE IN YEARS |
| Q245J | Combat or exposure to a war-zone                                                                                                                        | First time | __/__ AGE IN YEARS |
|       |                                                                                                                                                         | Last time  | __/__ AGE IN YEARS |
| Q245K | Captivity                                                                                                                                               | First time | __/__ AGE IN YEARS |
|       |                                                                                                                                                         | Last time  | __/__ AGE IN YEARS |
| Q245L | Life-threatening illness or injury                                                                                                                      | First time | __/__ AGE IN YEARS |
|       |                                                                                                                                                         | Last time  | __/__ AGE IN YEARS |
| Q245M | Severe human suffering                                                                                                                                  | First time | __/__ AGE IN YEARS |
|       |                                                                                                                                                         | Last time  | __/__ AGE IN YEARS |
| Q245N | Sudden violent death                                                                                                                                    | First time | __/__ AGE IN YEARS |
|       |                                                                                                                                                         | Last time  | __/__ AGE IN YEARS |
| Q245O | Sudden accidental death                                                                                                                                 | First time | __/__ AGE IN YEARS |
|       |                                                                                                                                                         | Last time  | __/__ AGE IN YEARS |
| Q245P | Serious injury, harm or death you caused to someone else                                                                                                | First time | __/__ AGE IN YEARS |
|       |                                                                                                                                                         | Last time  | __/__ AGE IN YEARS |
| Q245Q | Other stressful event or experience                                                                                                                     | First time | __/__ AGE IN YEARS |
|       |                                                                                                                                                         | Last time  | __/__ AGE IN YEARS |
| Q245R | Emotional abuse                                                                                                                                         | First time | __/__ AGE IN YEARS |

|                         |                                                                                                                                                                                                                                                                                            |                             |                    |
|-------------------------|--------------------------------------------------------------------------------------------------------------------------------------------------------------------------------------------------------------------------------------------------------------------------------------------|-----------------------------|--------------------|
|                         |                                                                                                                                                                                                                                                                                            | Last time                   | __/__ AGE IN YEARS |
| Q245S Emotional neglect |                                                                                                                                                                                                                                                                                            | First time                  | __/__ AGE IN YEARS |
|                         |                                                                                                                                                                                                                                                                                            | Last time                   | __/__ AGE IN YEARS |
| Q245T Physical neglect  |                                                                                                                                                                                                                                                                                            | First time                  | __/__ AGE IN YEARS |
|                         |                                                                                                                                                                                                                                                                                            | Last time                   | __/__ AGE IN YEARS |
| <hr/>                   |                                                                                                                                                                                                                                                                                            |                             |                    |
| Q246                    | How old were you when you first had sexual intercourse with your consent?                                                                                                                                                                                                                  |                             | __/__ AGE IN YEARS |
| <hr/>                   |                                                                                                                                                                                                                                                                                            |                             |                    |
| Q247                    | Do you have a sexual preference for males, females, or both?                                                                                                                                                                                                                               | Males .....                 | 1                  |
|                         |                                                                                                                                                                                                                                                                                            | Females .....               | 2                  |
|                         |                                                                                                                                                                                                                                                                                            | Both .....                  | 3                  |
|                         |                                                                                                                                                                                                                                                                                            | Not interested in sex ..... | 4                  |
|                         |                                                                                                                                                                                                                                                                                            | Prefer not to answer .....  | 5                  |
| <hr/>                   |                                                                                                                                                                                                                                                                                            |                             |                    |
| Q248                    | You have now finished this section of the questionnaire. We recognise that some of the life events we have asked about can be upsetting for some people to answer. But the questions are very important for our research into depression, so thank you for taking the time to answer them. |                             |                    |
| <hr/>                   |                                                                                                                                                                                                                                                                                            |                             |                    |

## Module 6 – Work and Sleep

- Q249 Do you have a regular work schedule (i.e. work the same hours every day on the same days each week)? This includes being a housewife or househusband.
- No .....1  
Yes .....2

\*\*\*\*\*  
IF REGULAR WORK SCHEDULE (Q249 = 2) GO TO Q251  
ELSE CONTINUE  
\*\*\*\*\*

- Q250 Which of the following best describes your current work arrangements? You may choose more than one.
- Shiftwork with rotating shifts .....1  
Shiftwork with irregular shifts .....2  
On-call or standby .....3  
Overtime or extra hours (paid or unpaid) .....4  
Fly-in fly-out (FIFO), drive-in drive-out (DIDO) or equivalent .....5

- Q251 How many days per week do you work on average?
- 0 .....1  
1 .....2  
2 .....3  
3 .....4  
4 .....5  
5 .....6  
6 .....7  
7 .....8

- Q252 The following questions relate to your usual sleep habits during the past month only. Your answers should indicate the most accurate reply for the **majority** of days and nights in the past month.

Q253 During the past month, when have you usually gone to bed at night?

Q253A On work days

|                      |    |
|----------------------|----|
| Earlier than 8:00 pm | 1  |
| 8:00 pm              | 2  |
| 8:30 pm              | 3  |
| 9:00 pm              | 4  |
| 9:30 pm              | 5  |
| 10:00 pm             | 6  |
| 10:30 pm             | 7  |
| 11:00 pm             | 8  |
| 11:30 pm             | 9  |
| Midnight             | 10 |
| 12:30 am             | 11 |
| 1:00 am              | 12 |
| 1:30 am              | 13 |
| 2:00 am              | 14 |
| 2:30 am              | 15 |
| 3:00 am              | 16 |
| After 3:00 am        | 17 |
| Don't know           | 18 |

Q253B On free days (e.g. weekend)

|                      |    |
|----------------------|----|
| Earlier than 8:00 pm | 1  |
| 8:00 pm              | 2  |
| 8:30 pm              | 3  |
| 9:00 pm              | 4  |
| 9:30 pm              | 5  |
| 10:00 pm             | 6  |
| 10:30 pm             | 7  |
| 11:00 pm             | 8  |
| 11:30 pm             | 9  |
| Midnight             | 10 |
| 12:30 am             | 11 |
| 1:00 am              | 12 |
| 1:30 am              | 13 |
| 2:00 am              | 14 |
| 2:30 am              | 15 |
| 3:00 am              | 16 |
| After 3:00 am        | 17 |
| Don't know           | 18 |

Q253C In an ideal situation (i.e. you have no responsibilities such as work, children, or engagements the next day)

|                      |    |
|----------------------|----|
| Earlier than 8:00 pm | 1  |
| 8:00 pm              | 2  |
| 8:30 pm              | 3  |
| 9:00 pm              | 4  |
| 9:30 pm              | 5  |
| 10:00 pm             | 6  |
| 10:30 pm             | 7  |
| 11:00 pm             | 8  |
| 11:30 pm             | 9  |
| Midnight             | 10 |
| 12:30 am             | 11 |
| 1:00 am              | 12 |
| 1:30 am              | 13 |
| 2:00 am              | 14 |
| 2:30 am              | 15 |
| 3:00 am              | 16 |
| After 3:00 am        | 17 |
| Don't know           | 18 |

Q254 During the past month, how long (in minutes) has it usually taken you to fall asleep each night?

Q254A On work days

\_\_/\_\_/\_\_ MINUTES

Q254B On free days

\_\_/\_\_/\_\_ MINUTES

---



Q255 During the past month, when have you usually gotten up in the morning?

Q255A On work days

|                |    |
|----------------|----|
| Before 4:30 am | 1  |
| 4:30 am        | 2  |
| 5:00 am        | 3  |
| 5:30 am        | 4  |
| 6:00 am        | 5  |
| 6:30 am        | 6  |
| 7:00 am        | 7  |
| 7:30 am        | 8  |
| 8:00 am        | 9  |
| 8:30 am        | 10 |
| 9:00 am        | 11 |
| 9:30 am        | 12 |
| 10:00 am       | 13 |
| 10:30 am       | 14 |
| 11:00 am       | 15 |
| 11:30 am       | 16 |
| Midday         | 17 |
| 12:30 pm       | 18 |
| 1:00 pm        | 19 |
| After 1:00 pm  | 20 |
| Don't know     | 21 |

Q255B On free days (e.g. weekend)

|                |    |
|----------------|----|
| Before 4:30 am | 1  |
| 4:30 am        | 2  |
| 5:00 am        | 3  |
| 5:30 am        | 4  |
| 6:00 am        | 5  |
| 6:30 am        | 6  |
| 7:00 am        | 7  |
| 7:30 am        | 8  |
| 8:00 am        | 9  |
| 8:30 am        | 10 |
| 9:00 am        | 11 |
| 9:30 am        | 12 |
| 10:00 am       | 13 |
| 10:30 am       | 14 |
| 11:00 am       | 15 |
| 11:30 am       | 16 |
| Midday         | 17 |
| 12:30 pm       | 18 |
| 1:00 pm        | 19 |
| After 1:00 pm  | 20 |
| Don't know     | 21 |

Q255C In an ideal situation (i.e. you have no responsibilities such as work, children, or engagements the next day)

|                |    |
|----------------|----|
| Before 4:30 am | 1  |
| 4:30 am        | 2  |
| 5:00 am        | 3  |
| 5:30 am        | 4  |
| 6:00 am        | 5  |
| 6:30 am        | 6  |
| 7:00 am        | 7  |
| 7:30 am        | 8  |
| 8:00 am        | 9  |
| 8:30 am        | 10 |
| 9:00 am        | 11 |
| 9:30 am        | 12 |
| 10:00 am       | 13 |
| 10:30 am       | 14 |
| 11:00 am       | 15 |
| 11:30 am       | 16 |
| Midday         | 17 |

|                     |    |
|---------------------|----|
| 12:30 pm .....      | 18 |
| 1:00 pm .....       | 19 |
| After 1:00 pm ..... | 20 |
| Don't know .....    | 21 |

---

Q256 During the past month, how many hours of **actual sleep** did you get at night? (This may be different than the number of hours you spend in bed) \_/\_ HOURS

---

Q257 Do you have young children who disrupt your sleep or who have changed your usual sleep pattern? No .....1  
Yes .....2

---

Q258 How likely are you to doze off or fall asleep in the following situations, in contrast to feeling just tired? This refers to your usual way of life in recent times. Even if you have not done some of these things recently try to work out how they would have affected you. Choose the most appropriate option for each situation.

Q258A Sitting and reading  
 Would never doze .....1  
 Slight chance of dozing .....2  
 Moderate chance of dozing .....3  
 High chance of dozing .....4

Q258B Watching TV  
 Would never doze .....1  
 Slight chance of dozing .....2  
 Moderate chance of dozing .....3  
 High chance of dozing .....4

Q258C Sitting, inactive in a public place (e.g. a theatre or a meeting)  
 Would never doze .....1  
 Slight chance of dozing .....2  
 Moderate chance of dozing .....3  
 High chance of dozing .....4

Q258D As a passenger in a car for an hour without a break  
 Would never doze .....1  
 Slight chance of dozing .....2  
 Moderate chance of dozing .....3  
 High chance of dozing .....4

Q258E Lying down to rest in the afternoon when circumstances permit  
 Would never doze .....1  
 Slight chance of dozing .....2  
 Moderate chance of dozing .....3  
 High chance of dozing .....4

Q258F Sitting and talking to someone  
 Would never doze .....1  
 Slight chance of dozing .....2  
 Moderate chance of dozing .....3  
 High chance of dozing .....4

Q258G Sitting quietly after lunch without alcohol  
 Would never doze .....1  
 Slight chance of dozing .....2  
 Moderate chance of dozing .....3  
 High chance of dozing .....4

Q258H In a car, while stopped for a few minutes in the traffic  
 Would never doze .....1  
 Slight chance of dozing .....2  
 Moderate chance of dozing .....3  
 High chance of dozing .....4

---

- Q259 If you usually have to get up at a specific time in the morning, how much do you depend on an alarm clock? Not at all .....1  
Slightly .....2  
Somewhat .....3  
Very much .....4
- 
- Q260 During the first half hour after you wake up in the morning, how do you feel? Very tired .....1  
Fairly tired .....2  
Fairly refreshed .....3  
Very refreshed .....4
- 
- Q261 If you had no commitments the next day, what time would you go to bed compared to your usual bedtime? Seldom or never later .....1  
Less than 1 hour later .....2  
1-2 hours later .....3  
More than 2 hours later .....4
- 
- Q262 At approximately what time in the evening do you feel tired, and, as a result, in need of sleep? 8:00 pm - 9:00 pm .....1  
9:00 pm - 10:15 pm .....2  
10:15 pm - 12:45 am .....3  
12:45 am - 2:00 am .....4  
2:00 am - 3:00 am .....5
- 
- Q263 At approximately what time of day do you usually feel your best? 5:00 am - 8:00 am .....1  
8:00 am - 10:00 am .....2  
10:00 am - 5:00 pm .....3  
5:00 pm - 10:00 pm .....4  
10:00 pm - 5:00 am .....5
- 
- Q264 One hears about “morning types” and “evening types.” Which one of these types do you consider yourself to be? Definitely a morning type .....1  
Rather more a morning type than an evening type .....2  
Rather more an evening type than a morning type .....3  
Definitely an evening type .....4
- 
- Q265 Over the last 2 weeks, have you had problems with falling asleep, staying asleep or waking up too early? No .....1  
Yes .....2

\*\*\*\*\*

IF PROBLEMS WITH SLEEP (Q265 = 2) CONTINUE, ELSE GO TO Q267

\*\*\*\*\*

|                                                                                                                                                                                         |                                                                                                                                                                                                           |                                                                                                                                          |
|-----------------------------------------------------------------------------------------------------------------------------------------------------------------------------------------|-----------------------------------------------------------------------------------------------------------------------------------------------------------------------------------------------------------|------------------------------------------------------------------------------------------------------------------------------------------|
| Q266                                                                                                                                                                                    | Please rate the current (i.e. last 2 weeks) severity of your insomnia problem(s).                                                                                                                         |                                                                                                                                          |
|                                                                                                                                                                                         | Q266A Difficulty falling asleep                                                                                                                                                                           | None .....1<br>Mild .....2<br>Moderate .....3<br>Severe .....4<br>Very severe .....5                                                     |
|                                                                                                                                                                                         | Q266B Difficulty staying asleep                                                                                                                                                                           | None .....1<br>Mild .....2<br>Moderate .....3<br>Severe .....4<br>Very severe .....5                                                     |
|                                                                                                                                                                                         | Q266C Problem waking up too early                                                                                                                                                                         | None .....1<br>Mild .....2<br>Moderate .....3<br>Severe .....4<br>Very severe .....5                                                     |
| <hr/>                                                                                                                                                                                   |                                                                                                                                                                                                           |                                                                                                                                          |
| Q267                                                                                                                                                                                    | How satisfied/dissatisfied are you with your current sleep pattern?                                                                                                                                       | Very dissatisfied .....1<br>Dissatisfied .....2<br>Moderately satisfied .....3<br>Satisfied .....4<br>Very satisfied .....5              |
| <p>*****</p> <p>IF ANY CURRENT INSOMNIA SYMPTOM (Q266A, Q266B OR Q266C &gt; 1) OR<br/>LESS THAN SATISFIED WITH CURRENT SLEEP (Q267 &lt;4) CONTINUE<br/>ELSE GO TO Q271</p> <p>*****</p> |                                                                                                                                                                                                           |                                                                                                                                          |
| <hr/>                                                                                                                                                                                   |                                                                                                                                                                                                           |                                                                                                                                          |
| Q268                                                                                                                                                                                    | How noticeable to others do you think your poor sleep is in terms of impairing the quality of your life?                                                                                                  | Not at all noticeable .....1<br>A little .....2<br>Somewhat .....3<br>Much .....4<br>Very much noticeable .....5                         |
| <hr/>                                                                                                                                                                                   |                                                                                                                                                                                                           |                                                                                                                                          |
| Q269                                                                                                                                                                                    | How worried/distressed are you about your current sleep problem?                                                                                                                                          | Not at all worried .....1<br>A little .....2<br>Somewhat .....3<br>Much .....4<br>Very much worried .....5                               |
| <hr/>                                                                                                                                                                                   |                                                                                                                                                                                                           |                                                                                                                                          |
| Q270                                                                                                                                                                                    | To what extent do you consider your sleep problem to interfere with your daily functioning (e.g, daytime fatigue, ability to function at work/daily chores, concentration, memory, mood, etc.) currently? | Not at all .....1<br>A little .....2<br>Somewhat .....3<br>Much .....4<br>Very much .....5                                               |
| <hr/>                                                                                                                                                                                   |                                                                                                                                                                                                           |                                                                                                                                          |
| Q271                                                                                                                                                                                    | During the past month, how often have you taken medicine to help you sleep (prescribed or "over the counter")?                                                                                            | Not during the past month .....1<br>Less than once a week .....2<br>Once or twice per week .....3<br>Three or more times per week .....4 |
| <hr/>                                                                                                                                                                                   |                                                                                                                                                                                                           |                                                                                                                                          |

- Q272 During the past month, how often have you had trouble staying awake while driving, eating meals, or engaging in social activity? Not during the past month .....1  
Less than once a week .....2  
Once or twice per week .....3  
Three or more times per week .....4
- 
- Q273 If you were to drink coffee in the evening, would it stop you from getting to sleep? No .....1  
Yes .....2
- 
- Q274 How many cups/cans/bottles of the following caffeinated beverages do you drink per day? Note: decaffeinated coffee or caffeine-free cola do not count towards this total. Please click or tap on the shaded line under your chosen number to register your response, even if the answer is "0".
- Q274A Coffee ..... CUPS
- Q274B Tea ..... CUPS
- Q274C Soft drinks (e.g. Coca-Cola, Pepsi, Mountain Dew etc) ..... CANS OR BOTTLES
- Q274D Energy drinks (e.g. Red Bull, Mother, Rockstar) ..... CANS OR BOTTLES
- 
- Q275 On average, how much time do you spend outdoors in natural light per day?
- Q275A On work days ..... HOURS  
..... MINUTES
- Q275B On free days (e.g. weekend) ..... HOURS  
..... MINUTES
- 
- Q276 During the last month, on how many nights or days per week have you had or been told you had the following:
- Q276A Loud snoring Never .....1  
Rarely, less than once a week .....2  
1-2 times per week .....3  
3-4 times per week .....4  
5-7 times per week .....5  
Don't know .....6
- Q276B Snorting or gasping Never .....1  
Rarely, less than once a week .....2  
1-2 times per week .....3  
3-4 times per week .....4  
5-7 times per week .....5  
Don't know .....6
- Q276C Your breathing stops or you choke or struggle for breath Never .....1  
Rarely, less than once a week .....2  
1-2 times per week .....3  
3-4 times per week .....4  
5-7 times per week .....5  
Don't know .....6
-

Q277 The purpose of the following questions is to find out how your mood and behaviour change over time. Note: We are interested in your experience, not others you may have observed.

---

Q278 For how long have you lived in your current town or in the surrounding area? \_/\_ YEARS  
\_/\_ MONTHS

---

Q279 To what degree do the following change with the seasons?

|                                            |                                                                                                                              |
|--------------------------------------------|------------------------------------------------------------------------------------------------------------------------------|
| Q279A Sleep length                         | No change .....1<br>Slight change .....2<br>Moderate change .....3<br>Marked change .....4<br>Extremely marked change .....5 |
| Q279B Social activity                      | No change .....1<br>Slight change .....2<br>Moderate change .....3<br>Marked change .....4<br>Extremely marked change .....5 |
| Q279C Mood (overall feeling of well being) | No change .....1<br>Slight change .....2<br>Moderate change .....3<br>Marked change .....4<br>Extremely marked change .....5 |
| Q279D Weight                               | No change .....1<br>Slight change .....2<br>Moderate change .....3<br>Marked change .....4<br>Extremely marked change .....5 |
| Q279E Appetite                             | No change .....1<br>Slight change .....2<br>Moderate change .....3<br>Marked change .....4<br>Extremely marked change .....5 |
| Q279F Energy level                         | No change .....1<br>Slight change .....2<br>Moderate change .....3<br>Marked change .....4<br>Extremely marked change .....5 |

---

Q280 In the following question, please select all applicable months. This may be a single month, a cluster of months, or any other grouping. At what time of year do you....?

|                                |                      |    |
|--------------------------------|----------------------|----|
| Q280A Feel best                | January .....        | 1  |
|                                | February .....       | 2  |
|                                | March .....          | 3  |
|                                | April .....          | 4  |
|                                | May .....            | 5  |
|                                | June .....           | 6  |
|                                | July .....           | 7  |
|                                | August .....         | 8  |
|                                | September .....      | 9  |
|                                | October .....        | 10 |
|                                | November .....       | 11 |
|                                | December .....       | 12 |
|                                | No particular months | 13 |
| Q280B Tend to gain most weight | January .....        | 1  |
|                                | February .....       | 2  |
|                                | March .....          | 3  |
|                                | April .....          | 4  |
|                                | May .....            | 5  |
|                                | June .....           | 6  |
|                                | July .....           | 7  |
|                                | August .....         | 8  |
|                                | September .....      | 9  |
|                                | October .....        | 10 |
|                                | November .....       | 11 |
|                                | December .....       | 12 |
|                                | No particular months | 13 |
| Q280C Socialise most           | January .....        | 1  |
|                                | February .....       | 2  |
|                                | March .....          | 3  |
|                                | April .....          | 4  |
|                                | May .....            | 5  |
|                                | June .....           | 6  |
|                                | July .....           | 7  |
|                                | August .....         | 8  |
|                                | September .....      | 9  |
|                                | October .....        | 10 |
|                                | November .....       | 11 |
|                                | December .....       | 12 |
|                                | No particular months | 13 |
| Q280D Sleep least              | January .....        | 1  |
|                                | February .....       | 2  |
|                                | March .....          | 3  |
|                                | April .....          | 4  |
|                                | May .....            | 5  |
|                                | June .....           | 6  |
|                                | July .....           | 7  |
|                                | August .....         | 8  |
|                                | September .....      | 9  |
|                                | October .....        | 10 |
|                                | November .....       | 11 |
|                                | December .....       | 12 |
|                                | No particular months | 13 |
| Q280E Eat most                 | January .....        | 1  |
|                                | February .....       | 2  |
|                                | March .....          | 3  |

|                        |                      |    |
|------------------------|----------------------|----|
|                        | April .....          | 4  |
|                        | May .....            | 5  |
|                        | June .....           | 6  |
|                        | July .....           | 7  |
|                        | August .....         | 8  |
|                        | September .....      | 9  |
|                        | October .....        | 10 |
|                        | November .....       | 11 |
|                        | December .....       | 12 |
|                        | No particular months | 13 |
| Q280F Lose most weight | January .....        | 1  |
|                        | February .....       | 2  |
|                        | March .....          | 3  |
|                        | April .....          | 4  |
|                        | May .....            | 5  |
|                        | June .....           | 6  |
|                        | July .....           | 7  |
|                        | August .....         | 8  |
|                        | September .....      | 9  |
|                        | October .....        | 10 |
|                        | November .....       | 11 |
|                        | December .....       | 12 |
|                        | No particular months | 13 |
| Q280G Socialise least  | January .....        | 1  |
|                        | February .....       | 2  |
|                        | March .....          | 3  |
|                        | April .....          | 4  |
|                        | May .....            | 5  |
|                        | June .....           | 6  |
|                        | July .....           | 7  |
|                        | August .....         | 8  |
|                        | September .....      | 9  |
|                        | October .....        | 10 |
|                        | November .....       | 11 |
|                        | December .....       | 12 |
|                        | No particular months | 13 |
| Q280H Feel worst       | January .....        | 1  |
|                        | February .....       | 2  |
|                        | March .....          | 3  |
|                        | April .....          | 4  |
|                        | May .....            | 5  |
|                        | June .....           | 6  |
|                        | July .....           | 7  |
|                        | August .....         | 8  |
|                        | September .....      | 9  |
|                        | October .....        | 10 |
|                        | November .....       | 11 |
|                        | December .....       | 12 |
|                        | No particular months | 13 |
| Q280I Eat least        | January .....        | 1  |
|                        | February .....       | 2  |
|                        | March .....          | 3  |
|                        | April .....          | 4  |
|                        | May .....            | 5  |
|                        | June .....           | 6  |
|                        | July .....           | 7  |
|                        | August .....         | 8  |
|                        | September .....      | 9  |
|                        | October .....        | 10 |



|                  |                            |    |
|------------------|----------------------------|----|
|                  | November .....             | 11 |
|                  | December .....             | 12 |
|                  | No particular months ..... | 13 |
| Q280J Sleep most | January .....              | 1  |
|                  | February .....             | 2  |
|                  | March .....                | 3  |
|                  | April .....                | 4  |
|                  | May .....                  | 5  |
|                  | June .....                 | 6  |
|                  | July .....                 | 7  |
|                  | August .....               | 8  |
|                  | September .....            | 9  |
|                  | October .....              | 10 |
|                  | November .....             | 11 |
|                  | December .....             | 12 |
|                  | No particular months ..... | 13 |

\*\*\*\*\*

IF ANY CHANGE OF BEHAVIOUR WITH SEASONS  
(ANY OF Q279A TO Q279F > 1) CONTINUE  
ELSE GO TO Q283

\*\*\*\*\*

|      |                                                                                                                       |           |   |
|------|-----------------------------------------------------------------------------------------------------------------------|-----------|---|
| Q281 | If you experience changes with the seasons (in energy, mood, sleep etc), do you feel that they are a problem for you? | No .....  | 1 |
|      |                                                                                                                       | Yes ..... | 2 |

\*\*\*\*\*

IF PROBLEM (Q281=2) CONTINUE, ELSE GO TO Q283

\*\*\*\*\*

|      |                    |                 |   |
|------|--------------------|-----------------|---|
| Q282 | Is the problem...? | Mild .....      | 1 |
|      |                    | Moderate .....  | 2 |
|      |                    | Marked .....    | 3 |
|      |                    | Severe .....    | 4 |
|      |                    | Disabling ..... | 5 |

Q283 Approximately how many hours of each 24-hour day do you sleep during each season? (Include naps)

Q283A Winter

|               |    |
|---------------|----|
| 0             | 1  |
| 1             | 2  |
| 2             | 3  |
| 3             | 4  |
| 4             | 5  |
| 5             | 6  |
| 6             | 7  |
| 7             | 8  |
| 8             | 9  |
| 9             | 10 |
| 10            | 11 |
| 11            | 12 |
| 12            | 13 |
| 13            | 14 |
| 14            | 15 |
| 15            | 16 |
| 16            | 17 |
| 17            | 18 |
| 18            | 19 |
| Over 18 hours | 20 |

Q283B Spring

|               |    |
|---------------|----|
| 0             | 1  |
| 1             | 2  |
| 2             | 3  |
| 3             | 4  |
| 4             | 5  |
| 5             | 6  |
| 6             | 7  |
| 7             | 8  |
| 8             | 9  |
| 9             | 10 |
| 10            | 11 |
| 11            | 12 |
| 12            | 13 |
| 13            | 14 |
| 14            | 15 |
| 15            | 16 |
| 16            | 17 |
| 17            | 18 |
| 18            | 19 |
| Over 18 hours | 20 |

Q283C Summer

|    |    |
|----|----|
| 0  | 1  |
| 1  | 2  |
| 2  | 3  |
| 3  | 4  |
| 4  | 5  |
| 5  | 6  |
| 6  | 7  |
| 7  | 8  |
| 8  | 9  |
| 9  | 10 |
| 10 | 11 |
| 11 | 12 |
| 12 | 13 |
| 13 | 14 |
| 14 | 15 |
| 15 | 16 |
| 16 | 17 |
| 17 | 18 |

|              |                     |    |
|--------------|---------------------|----|
|              | 18 .....            | 19 |
|              | Over 18 hours ..... | 20 |
| Q283D Autumn | 0 .....             | 1  |
|              | 1 .....             | 2  |
|              | 2 .....             | 3  |
|              | 3 .....             | 4  |
|              | 4 .....             | 5  |
|              | 5 .....             | 6  |
|              | 6 .....             | 7  |
|              | 7 .....             | 8  |
|              | 8 .....             | 9  |
|              | 9 .....             | 10 |
|              | 10 .....            | 11 |
|              | 11 .....            | 12 |
|              | 12 .....            | 13 |
|              | 13 .....            | 14 |
|              | 14 .....            | 15 |
|              | 15 .....            | 16 |
|              | 16 .....            | 17 |
|              | 17 .....            | 18 |
|              | 18 .....            | 19 |
|              | Over 18 hours ..... | 20 |

---

Q284 Another section finished!

---

## Module 7 – General health and lifestyle

Q285 Which of the following best describes your natural eye colour?

|       |        |
|-------|--------|
| Blue  | .....1 |
| Grey  | .....2 |
| Green | .....3 |
| Hazel | .....4 |
| Brown | .....5 |

Q286 Which of the following best describes your natural hair colour at age 20?  
(If you are not yet 20 years old, what is your natural hair colour now?)

|                     |        |
|---------------------|--------|
| Fair/blonde         | .....1 |
| Light brown         | .....2 |
| Light red or ginger | .....3 |
| Dark red or auburn  | .....4 |
| Dark brown          | .....5 |
| Black               | .....6 |

Q287 Which of the following best describes your natural hair texture at age 20?  
(If you are not yet 20 years old, what is your natural hair texture now?)

|          |        |
|----------|--------|
| Straight | .....1 |
| Wavy     | .....2 |
| Curly    | .....3 |

Q288 Has your hair started to grey?

|     |        |
|-----|--------|
| No  | .....1 |
| Yes | .....2 |

\*\*\*\*\*  
 IF GREYING (Q288=2) CONTINUE  
 ELSE IF MALE (Q4 = 1) GO TO Q291  
 ELSE GO TO Q294  
 \*\*\*\*\*

Q289 At what age did you notice that your hair was starting to go grey? An approximate age is fine. \_/\_ YEARS

Q290 What percentage of grey hair do you now have?

|            |        |
|------------|--------|
| 0%         | .....1 |
| 10%        | .....2 |
| 25%        | .....3 |
| 50%        | .....4 |
| 75%        | .....5 |
| 100%       | .....6 |
| Don't know | .....7 |

\*\*\*\*\*  
 IF MALE (Q4 = 1) CONTINUE ELSE GO TO Q294  
 \*\*\*\*\*

Q291 Have you experienced any natural hair loss (that is, hair loss not resulting from illness or medical treatment)?

|     |        |
|-----|--------|
| No  | .....1 |
| Yes | .....2 |

\*\*\*\*\*  
 IF YES (Q291 = 2) CONTINUE ELSE GO TO Q294  
 \*\*\*\*\*

Q292 Which diagram below best describes your hair (loss) at the present time?

|                                                                                      |                |    |
|--------------------------------------------------------------------------------------|----------------|----|
|   | 1 .....        | 1  |
|   | 2 .....        | 2  |
|   | 2a .....       | 3  |
|   | 3 .....        | 4  |
|   | 3a .....       | 5  |
|   | 3 Vertex ..... | 6  |
|   | 4 .....        | 7  |
|   | 4a .....       | 8  |
|   | 5 .....        | 9  |
|   | 5a .....       | 10 |
|   | 6 .....        | 11 |
|  | 7 .....        | 12 |

---

Q293 At what age did you first start to experience hair loss? An approximate age is fine. \_/\_/ YEA

---

Q294 Which hand do you usually use to write legibly? Left .....1  
Either .....2  
Right .....3

---

Q295 How would you describe your skin colour on areas never exposed to the sun, at age 20? (If you are not yet 20 years old, how would you describe your skin colour now on areas never exposed to the sun?) Fair or pale .....1  
Medium .....2  
Olive or dark .....3

\*\*\*\*\*  
IF AGE 30 OR OLDER (Q5 > 29) CONTINUE ELSE GO TO Q298  
\*\*\*\*\*

---

Q296 Imagine, when you were in your 20s, that you were sitting on the beach in the strong sun for 30 minutes in the middle of the day, without any protection like sunscreen or clothing, for the first time each summer. How much would your skin have burnt? Always burned, never tanned .....1  
Usually burned, sometimes tanned..2  
Sometimes burned, usually tanned..3  
Never burned, always tanned .....4

---

|      |                                                                                                                                                                          |                                                                                           |
|------|--------------------------------------------------------------------------------------------------------------------------------------------------------------------------|-------------------------------------------------------------------------------------------|
| Q297 | Imagine, when you were in your 20s, you spent several weeks at the beach in strong sun, without any protection like sunscreen or clothing. How much would your skin tan? | Not tan at all .....1<br>Tan lightly .....2<br>Tan moderately .....3<br>Tan deeply .....4 |
|------|--------------------------------------------------------------------------------------------------------------------------------------------------------------------------|-------------------------------------------------------------------------------------------|

\*\*\*\*\*  
GO TO Q300  
\*\*\*\*\*

|      |                                                                                                                                                                                                           |                                                                                                                                            |
|------|-----------------------------------------------------------------------------------------------------------------------------------------------------------------------------------------------------------|--------------------------------------------------------------------------------------------------------------------------------------------|
| Q298 | Imagine sitting on the beach in the strong sun for 30 minutes in the middle of the day, without any protection like sunscreen or clothing, for the first time each summer. How much would your skin burn? | Always burn, never tan .....1<br>Usually burn, sometimes tan .....2<br>Sometimes burn, usually tan .....3<br>Never burn, always tan .....4 |
|------|-----------------------------------------------------------------------------------------------------------------------------------------------------------------------------------------------------------|--------------------------------------------------------------------------------------------------------------------------------------------|

|      |                                                                                                                                             |                                                                                           |
|------|---------------------------------------------------------------------------------------------------------------------------------------------|-------------------------------------------------------------------------------------------|
| Q299 | Imagine spending several weeks at the beach in strong sun, without any protection like sunscreen or clothing. How much would your skin tan? | Not tan at all .....1<br>Tan lightly .....2<br>Tan moderately .....3<br>Tan deeply .....4 |
|------|---------------------------------------------------------------------------------------------------------------------------------------------|-------------------------------------------------------------------------------------------|

|      |                                                         |                                                                |
|------|---------------------------------------------------------|----------------------------------------------------------------|
| Q300 | During your childhood, how much freckling did you have? | None .....1<br>Light .....2<br>Moderate .....3<br>Heavy .....4 |
|------|---------------------------------------------------------|----------------------------------------------------------------|

|      |                                                                                                                                                                                                          |                                                                                       |
|------|----------------------------------------------------------------------------------------------------------------------------------------------------------------------------------------------------------|---------------------------------------------------------------------------------------|
| Q301 | Moles are brown or black spots on the skin which usually start in childhood. They are usually darker and larger than freckles. How many moles do you think you have, including any you have had removed? | None .....1<br>Less than 10 .....2<br>Between 10 and 50 .....3<br>More than 50 .....4 |
|------|----------------------------------------------------------------------------------------------------------------------------------------------------------------------------------------------------------|---------------------------------------------------------------------------------------|

|      |                                                                                 |                                                                |
|------|---------------------------------------------------------------------------------|----------------------------------------------------------------|
| Q302 | Many people suffer from acne during their lives. How much acne do you have now? | None .....1<br>Mild .....2<br>Moderate .....3<br>Severe .....4 |
|------|---------------------------------------------------------------------------------|----------------------------------------------------------------|

|      |                                                      |                                                                |
|------|------------------------------------------------------|----------------------------------------------------------------|
| Q303 | How much acne did you have when you were a teenager? | None .....1<br>Mild .....2<br>Moderate .....3<br>Severe .....4 |
|------|------------------------------------------------------|----------------------------------------------------------------|

|      |                                                                                                                                    |                         |
|------|------------------------------------------------------------------------------------------------------------------------------------|-------------------------|
| Q304 | Have you ever suffered from wheezing? (Wheezing is a whistling noise coming from your chest, though it can be heard in the mouth.) | No .....1<br>Yes .....2 |
|------|------------------------------------------------------------------------------------------------------------------------------------|-------------------------|

\*\*\*\*\*  
IF YES (Q304 = 2) CONTINUE, ELSE GO TO Q306  
\*\*\*\*\*

|      |                                                                       |                                                                                               |
|------|-----------------------------------------------------------------------|-----------------------------------------------------------------------------------------------|
| Q305 | In the last 12 months, how often have you had an episode of wheezing? | Not at all .....1<br>1 to 4 times .....2<br>5 to 12 times .....3<br>More than 12 times .....4 |
|------|-----------------------------------------------------------------------|-----------------------------------------------------------------------------------------------|

Q306 In the last 12 months, have you had a dry cough at night, when you didn't have a cold or a daytime cough? No ..... 1  
 Yes ..... 2

---

Q307 Do you get a tight feeling in the chest or shortness of breath when near an animal, feathers or dust? No ..... 1  
 Yes ..... 2

---

Q308 Do you suffer a lot of rhinitis? (Rhinitis is a runny, itchy nose, often with watery and itchy eyes, when you do not have a cold.) No ..... 1  
 Yes ..... 2

---

Q309 Have you ever suffered from eczema? (Eczema is a patchy, itchy rash that occurs on the bends of the elbow, knees and wrists.) No ..... 1  
 Yes ..... 2

---

Q310 Has a doctor ever diagnosed you as suffering from any of the following?

|                 |             |
|-----------------|-------------|
| Q310A Pneumonia | No ..... 1  |
|                 | Yes ..... 2 |
| Q310B Asthma    | No ..... 1  |
|                 | Yes ..... 2 |
| Q310C Hayfever  | No ..... 1  |
|                 | Yes ..... 2 |
| Q310D Eczema    | No ..... 1  |
|                 | Yes ..... 2 |

\*\*\*\*\*  
 IF ANY DIAGNOSIS (Q310A TO Q310D = 2), COMPLETE THE RELEVANT SECTION OF Q311, ELSE GO TO Q312  
 \*\*\*\*\*

---

Q311 At what age were you first diagnosed as suffering from the following: Please enter age values in years (and months, if known). An approximate age is fine.

|                 |                                 |
|-----------------|---------------------------------|
| Q311A Pneumonia | ___/___ YEARS<br>___/___ MONTHS |
| Q311B Asthma    | ___/___ YEARS<br>___/___ MONTHS |
| Q311C Hayfever  | ___/___ YEARS<br>___/___ MONTHS |
| Q311D Eczema    | ___/___ YEARS<br>___/___ MONTHS |

---

Q312 Have you ever taken any medicine for asthma or wheezing? No ..... 1  
 Yes ..... 2

---

Q313 Are you currently taking asthma medication? No ..... 1  
 Yes ..... 2

---

|       |                                                                                |                                          |
|-------|--------------------------------------------------------------------------------|------------------------------------------|
| Q314  | Has a doctor ever diagnosed your parents or siblings as suffering from asthma? | No .....1<br>Yes .....2                  |
| <hr/> |                                                                                |                                          |
| Q315  | Have you had an allergic reaction to any of the following items?               |                                          |
| Q315A | Foods                                                                          | No .....1<br>Yes .....2<br>Unsure .....3 |
| Q315B | Plants (including pollen)                                                      | No .....1<br>Yes .....2<br>Unsure .....3 |
| Q315C | Animals (mammals, birds or insects)                                            | No .....1<br>Yes .....2<br>Unsure .....3 |
| Q315D | Dust mites                                                                     | No .....1<br>Yes .....2<br>Unsure .....3 |
| Q315E | Mould                                                                          | No .....1<br>Yes .....2<br>Unsure .....3 |
| Q315F | Latex                                                                          | No .....1<br>Yes .....2<br>Unsure .....3 |
| Q315G | Medicines                                                                      | No .....1<br>Yes .....2<br>Unsure .....3 |
| Q315H | Vaccines                                                                       | No .....1<br>Yes .....2<br>Unsure .....3 |
| Q315I | Something else                                                                 | No .....1<br>Yes .....2<br>Unsure .....3 |
| <hr/> |                                                                                |                                          |



\*\*\*\*\*  
 FOR EACH ALLERGEN AT Q315 (Q315A TO Q315I = 2), COMPLETE  
 THE RELEVANT SECTION OF Q316  
 ELSE GO TO Q317  
 \*\*\*\*\*

Q316 What type of reaction did you have? (Please select all that apply).

Q316A Foods

Abdominal pain or vomiting .....1  
 Diarrhoea .....2  
 Difficulty swallowing or speaking ..3  
 Drop of blood pressure, or  
 passing out .....4  
 Hives (red, itchy, swollen skin .....5  
 Itching in your mouth .....6  
 Itchy or runny nose .....7  
 Nausea .....8  
 Wheezing or asthma .....9  
 None of the above .....10

Q316B Plants (including pollen)

Abdominal pain or vomiting .....1  
 Diarrhoea .....2  
 Difficulty swallowing or speaking ..3  
 Drop of blood pressure, or  
 passing out .....4  
 Hives (red, itchy, swollen skin .....5  
 Itching in your mouth .....6  
 Itchy or runny nose .....7  
 Nausea .....8  
 Wheezing or asthma .....9  
 None of the above .....10

Q316C Animals (mammals, birds or insects)

Abdominal pain or vomiting .....1  
 Diarrhoea .....2  
 Difficulty swallowing or speaking ..3  
 Drop of blood pressure, or  
 passing out .....4  
 Hives (red, itchy, swollen skin .....5  
 Itching in your mouth .....6  
 Itchy or runny nose .....7  
 Nausea .....8  
 Wheezing or asthma .....9  
 None of the above .....10

Q316D Dust mites

Abdominal pain or vomiting .....1  
 Diarrhoea .....2  
 Difficulty swallowing or speaking ..3  
 Drop of blood pressure, or  
 passing out .....4  
 Hives (red, itchy, swollen skin .....5  
 Itching in your mouth .....6  
 Itchy or runny nose .....7  
 Nausea .....8  
 Wheezing or asthma .....9  
 None of the above .....10

Q316E Mould

Abdominal pain or vomiting .....1  
 Diarrhoea .....2  
 Difficulty swallowing or speaking ..3  
 Drop of blood pressure, or  
 passing out .....4  
 Hives (red, itchy, swollen skin .....5  
 Itching in your mouth .....6

|                      |                                                  |
|----------------------|--------------------------------------------------|
|                      | Itchy or runny nose .....7                       |
|                      | Nausea .....8                                    |
|                      | Wheezing or asthma .....9                        |
|                      | None of the above .....10                        |
| Q316F Latex          | Abdominal pain or vomiting .....1                |
|                      | Diarrhoea .....2                                 |
|                      | Difficulty swallowing or speaking ..3            |
|                      | Drop of blood pressure, or<br>passing out .....4 |
|                      | Hives (red, itchy, swollen skin .....5           |
|                      | Itching in your mouth .....6                     |
|                      | Itchy or runny nose .....7                       |
|                      | Nausea .....8                                    |
|                      | Wheezing or asthma .....9                        |
|                      | None of the above .....10                        |
| Q316G Medicines      | Abdominal pain or vomiting .....1                |
|                      | Diarrhoea .....2                                 |
|                      | Difficulty swallowing or speaking ..3            |
|                      | Drop of blood pressure, or<br>passing out .....4 |
|                      | Hives (red, itchy, swollen skin .....5           |
|                      | Itching in your mouth .....6                     |
|                      | Itchy or runny nose .....7                       |
|                      | Nausea .....8                                    |
|                      | Wheezing or asthma .....9                        |
|                      | None of the above .....10                        |
| Q316H Vaccines       | Abdominal pain or vomiting .....1                |
|                      | Diarrhoea .....2                                 |
|                      | Difficulty swallowing or speaking ..3            |
|                      | Drop of blood pressure, or<br>passing out .....4 |
|                      | Hives (red, itchy, swollen skin .....5           |
|                      | Itching in your mouth .....6                     |
|                      | Itchy or runny nose .....7                       |
|                      | Nausea .....8                                    |
|                      | Wheezing or asthma .....9                        |
|                      | None of the above .....10                        |
| Q316I Something else | Abdominal pain or vomiting .....1                |
|                      | Diarrhoea .....2                                 |
|                      | Difficulty swallowing or speaking ..3            |
|                      | Drop of blood pressure, or<br>passing out .....4 |
|                      | Hives (red, itchy, swollen skin .....5           |
|                      | Itching in your mouth .....6                     |
|                      | Itchy or runny nose .....7                       |
|                      | Nausea .....8                                    |
|                      | Wheezing or asthma .....9                        |
|                      | None of the above .....10                        |

---

\*\*\*\*\*  
 IF FEMALE (Q4 = 2) CONTINUE, ELSE GO TO Q327  
 \*\*\*\*\*

Q317 Has a doctor ever diagnosed you with any of the following?

|                                                                                                                                                                     |           |   |
|---------------------------------------------------------------------------------------------------------------------------------------------------------------------|-----------|---|
| Q317A Fibroids in the uterus (a benign tumour of fibrous and muscular tissue)                                                                                       | No .....  | 1 |
|                                                                                                                                                                     | Yes ..... | 2 |
| Q317B Polycystic ovarian syndrome (a hormonal disorder characterised by ovarian follicles failing to ovulate and remaining as multiple cysts, distending the ovary) | No .....  | 1 |
|                                                                                                                                                                     | Yes ..... | 2 |
| Q317C Endometriosis (the presence of tissue similar to the kind lining the uterus, at other sites in the pelvis)                                                    | No .....  | 1 |
|                                                                                                                                                                     | Yes ..... | 2 |

\*\*\*\*\*  
 FOR EACH CONDITION AT Q317 (Q317A TO Q317C = 2), COMPLETE  
 THE RELEVANT SECTION OF Q318, ELSE GO TO Q320  
 \*\*\*\*\*

Q318 How old were you when this first occurred?

|                                                                                                                                                                     |               |
|---------------------------------------------------------------------------------------------------------------------------------------------------------------------|---------------|
| Q318A Fibroids in the uterus (a benign tumour of fibrous and muscular tissue)                                                                                       | ___/___ YEARS |
| Q318B Polycystic ovarian syndrome (a hormonal disorder characterised by ovarian follicles failing to ovulate and remaining as multiple cysts, distending the ovary) | ___/___ YEARS |
| Q318C Endometriosis (the presence of tissue similar to the kind lining the uterus, at other sites in the pelvis)                                                    | ___/___ YEARS |

\*\*\*\*\*  
 IF ENDOMETRIOSIS (Q317C = 2), CONTINUE, ELSE GO TO Q320  
 \*\*\*\*\*

Q319 Has your diagnosis of endometriosis been confirmed by:

|                                     |   |
|-------------------------------------|---|
| Laparoscopy (keyhole surgery) ..... | 1 |
| Laparotomy (open surgery) .....     | 2 |
| Other surgery .....                 | 3 |
| Symptoms alone .....                | 4 |
| Internal examination .....          | 5 |

Q320 Have you begun to menstruate (started having your period)?

|           |   |
|-----------|---|
| No .....  | 1 |
| Yes ..... | 2 |

\*\*\*\*\*  
 IF YES (Q320 = 2) CONTINUE, ELSE GO TO Q324  
 \*\*\*\*\*

Q321 How old were you when you had your first menstrual period?

|           |   |
|-----------|---|
| No .....  | 1 |
| Yes ..... | 2 |

\*\*\*\*\*  
 IF Q425 NOT YET PRESENTED CONTINUE, ELSE GO TO Q323  
 \*\*\*\*\*

Q322 Have you reached menopause? No .....1  
 Yes .....2

\*\*\*\*\*  
 IF MENOPAUSE REACHED (Q322 = 2 OR Q425=2) CONTINUE,  
 ELSE GO TO Q324  
 \*\*\*\*\*

Q323 How old were you when your periods stopped? \_\_\_/\_\_\_ YEARS

Q324 Have you had a hysterectomy? No .....1  
 Yes .....2

\*\*\*\*\*  
 IF YES (Q324 = 2) CONTINUE, ELSE GO TO Q326  
 \*\*\*\*\*

Q325 How old were you when you had your hysterectomy? \_\_\_/\_\_\_ YEARS

Q326 Have you ever tried for 12 months or more to conceive without  
 success? No .....1  
 Yes .....2

|      |                                                                                          |                                      |
|------|------------------------------------------------------------------------------------------|--------------------------------------|
| Q327 | Have you ever had any of the following medical conditions? Please select all that apply. | Arthritis .....1                     |
|      |                                                                                          | Ankylosing spondylitis .....2        |
|      |                                                                                          | Back problems .....3                 |
|      |                                                                                          | Barrett's oesophagus .....4          |
|      |                                                                                          | Cancer .....5                        |
|      |                                                                                          | Chronic fatigue syndrome .....6      |
|      |                                                                                          | Chronic lung disease .....7          |
|      |                                                                                          | Celiac disease .....8                |
|      |                                                                                          | Crohn's disease .....9               |
|      |                                                                                          | Ulcerative colitis .....10           |
|      |                                                                                          | Diabetes or high blood sugar .....11 |
|      |                                                                                          | Epilepsy or seizure disorder .....12 |
|      |                                                                                          | Eye problems .....13                 |
|      |                                                                                          | Gallstones .....14                   |
|      |                                                                                          | Graves' disease .....15              |
|      |                                                                                          | Hashimoto's disease .....16          |
|      |                                                                                          | Heart attack .....17                 |
|      |                                                                                          | Heart disease .....18                |
|      |                                                                                          | High blood pressure .....19          |
|      |                                                                                          | HIV infection .....20                |
|      |                                                                                          | Kidney disease .....21               |
|      |                                                                                          | Lupus (SLE) .....22                  |
|      |                                                                                          | Lymphoedema .....23                  |
|      |                                                                                          | Multiple sclerosis .....24           |
|      |                                                                                          | Neck problems .....25                |
|      |                                                                                          | Osteoporosis .....26                 |
|      |                                                                                          | Psoriasis .....27                    |
|      |                                                                                          | Reflux .....28                       |
|      |                                                                                          | Seasonal allergies .....29           |
|      |                                                                                          | Sjögren's syndrome .....30           |
|      |                                                                                          | Stroke .....31                       |
|      |                                                                                          | Tuberculosis .....32                 |
|      |                                                                                          | Ulcers .....33                       |
|      |                                                                                          | Any other chronic pain .....34       |
|      |                                                                                          | Other .....35                        |
|      |                                                                                          | None of the above .....36            |

\*\*\*\*\*  
 IF ARTHRITIS, CANCER, CHRONIC LUNG DISEASE,  
 DIABETES OR HIGH BLOOD SUGAR, EYE PROBLEMS OR ULCERS  
 IS SELECTED (Q327 = 1, 5, 7, 11, 13 OR 33) CONTINUE  
 IF ANY OTHER CONDITION SELECTED, GO TO Q329  
 ELSE GO TO Q330  
 \*\*\*\*\*

|          |                                                                           |            |
|----------|---------------------------------------------------------------------------|------------|
| Q328     | Please select the specific type of the medical condition(s) you have had. |            |
| Q328_1A  | Osteoarthritis [IF ARTHRITIS (Q327 = 1)]                                  | Yes .....1 |
| Q328_1B  | Rheumatoid arthritis [IF ARTHRITIS (Q327 = 1)]                            | Yes .....1 |
| Q328_1C  | Juvenile idiopathic arthritis (JIA) [IF ARTHRITIS (Q327 = 1)]             | Yes .....1 |
| Q328_1D  | Psoriatic arthritis [IF ARTHRITIS (Q327 = 1)]                             | Yes .....1 |
| Q328_1E  | Other arthritis [IF ARTHRITIS (Q327 = 1)]                                 | Yes .....1 |
| Q328_5A  | Bladder cancer [IF CANCER (Q327 = 5)]                                     | Yes .....1 |
| Q328_5B  | Bowel (colorectal) cancer [IF CANCER (Q327 = 5)]                          | Yes .....1 |
| Q328_5C  | Brain cancer [IF CANCER (Q327 = 5)]                                       | Yes .....1 |
| Q328_5D  | Breast cancer [IF CANCER (Q327 = 5)]                                      | Yes .....1 |
| Q328_5E  | Cervical cancer [IF CANCER (Q327 = 5) AND FEMALE (Q4 = 2)]                | Yes .....1 |
| Q328_5F  | Endometrial cancer [IF CANCER (Q327 = 5) AND FEMALE (Q4 = 2)]             | Yes .....1 |
| Q328_5G  | Kidney cancer [IF CANCER (Q327 = 5)]                                      | Yes .....1 |
| Q328_5H  | Leukemia [IF CANCER (Q327 = 5)]                                           | Yes .....1 |
| Q328_5I  | Liver cancer [IF CANCER (Q327 = 5)]                                       | Yes .....1 |
| Q328_5J  | Lung cancer [IF CANCER (Q327 = 5)]                                        | Yes .....1 |
| Q328_5K  | Lymphoma [IF CANCER (Q327 = 5)]                                           | Yes .....1 |
| Q328_5L  | Melanoma [IF CANCER (Q327 = 5)]                                           | Yes .....1 |
| Q328_5M  | Skin cancer other than melanoma [IF CANCER (Q327 = 5)]                    | Yes .....1 |
| Q328_5N  | Oesophageal cancer [IF CANCER (Q327 = 5)]                                 | Yes .....1 |
| Q328_5O  | Ovarian cancer [IF CANCER (Q327 = 5) AND FEMALE (Q4 = 2)]                 | Yes .....1 |
| Q328_5P  | Pancreatic cancer [IF CANCER (Q327 = 5)]                                  | Yes .....1 |
| Q328_5Q  | Prostate cancer [IF CANCER (Q327 = 5) AND MALE (Q4 = 1)]                  | Yes .....1 |
| Q328_5R  | Other cancer [IF CANCER (Q327 = 5)]                                       | Yes .....1 |
| Q328_7A  | Emphysema [IF CHRONIC LUNG DISEASE (Q327 = 7)]                            | Yes .....1 |
| Q328_7B  | Chronic bronchitis [IF CHRONIC LUNG DISEASE (Q327 = 7)]                   | Yes .....1 |
| Q328_7C  | Other chronic lung disease [IF CHRONIC LUNG DISEASE (Q327 = 7)]           | Yes .....1 |
| Q328_11A | Type 1 diabetes [IF DIABETES / HBS (Q327 = 11)]                           | Yes .....1 |

|                                                                                      |            |
|--------------------------------------------------------------------------------------|------------|
| Q328_11B Type 2 diabetes [IF DIABETES / HBS (Q327 = 11)]                             | Yes .....1 |
| Q328_11C Gestational diabetes [IF DIABETES / HBS (Q327 = 11)<br>AND FEMALE (Q4 = 2)] | Yes .....1 |
| Q328_11D Other diabetes or high blood sugar [IF DIABETES / HBS<br>(Q327 = 11)]       | Yes .....1 |
| Q328_13A Long-sighted (e.g. glasses for reading) [IF EYE<br>PROBLEMS (Q327 = 13)]    | Yes .....1 |
| Q328_13B Short-sighted (e.g. glasses for distance) [IF EYE<br>PROBLEMS (Q327 = 13)]  | Yes .....1 |
| Q328_13C Astigmatism [IF EYE PROBLEMS (Q327 = 13)]                                   | Yes .....1 |
| Q328_13D Cataracts [IF EYE PROBLEMS (Q327 = 13)]                                     | Yes .....1 |
| Q328_13E Glaucoma [IF EYE PROBLEMS (Q327 = 13)]                                      | Yes .....1 |
| Q328_13F Macular degeneration [IF EYE PROBLEMS (Q327 = 13)]                          | Yes .....1 |
| Q328_13G Pterygium [IF EYE PROBLEMS (Q327 = 13)]                                     | Yes .....1 |
| Q328_13H Strabismus ("turned" or "lazy" eye) [IF EYE PROBLEMS<br>(Q327 = 13)]        | Yes .....1 |
| Q328_13I Other eye problem [IF EYE PROBLEMS (Q327 = 13)]                             | Yes .....1 |
| Q328_33A Mouth ulcers [IF ULCERS (Q327 = 33)]                                        | Yes .....1 |
| Q328_33B Leg ulcers [IF ULCERS (Q327 = 33)]                                          | Yes .....1 |
| Q328_33C Stomach (gastric) ulcers [IF ULCERS (Q327 = 33)]                            | Yes .....1 |
| Q328_33D Duodenal ulcers [IF ULCERS (Q327 = 33)]                                     | Yes .....1 |
| Q328_33E Other ulcers [IF ULCERS (Q327 = 33)]                                        | Yes .....1 |

---

\*\*\*\*\*  
 COMPLETE FOR ALL CONDITIONS IDENTIFIED AT Q327 AND Q328  
 \*\*\*\*\*

|      |                                                                                                                                     |                |
|------|-------------------------------------------------------------------------------------------------------------------------------------|----------------|
| Q329 | How old were you when these medical conditions first began, and when you most recently experienced them? Approximate ages are fine. |                |
|      | Q329_1AF Age osteoarthritis began [IF Q328_1A = 1]                                                                                  | __/__/__ YEARS |
|      | Q329_1AR Age osteoarthritis most recent [IF Q328_1A = 1]                                                                            | __/__/__ YEARS |
|      | Q329_1BF Age rheumatoid arthritis began [IF Q328_1B = 1]                                                                            | __/__/__ YEARS |
|      | Q329_1BR Age rheumatoid arthritis most recent [IF Q328_1B = 1]                                                                      | __/__/__ YEARS |
|      | Q329_1CF Age juvenile idiopathic arthritis (JIA) began [IF Q328_1C = 1]                                                             | __/__/__ YEARS |
|      | Q329_1CR Age juvenile idiopathic arthritis (JIA) most recent [IF Q328_1C = 1]                                                       | __/__/__ YEARS |
|      | Q329_1DF Age psoriatic arthritis began [IF Q328_1D = 1]                                                                             | __/__/__ YEARS |
|      | Q329_1DR Age psoriatic arthritis most recent [IF Q328_1D = 1]                                                                       | __/__/__ YEARS |
|      | Q329_1EF Age other arthritis began [IF Q328_1E = 1]                                                                                 | __/__/__ YEARS |
|      | Q329_1ER Age other arthritis most recent [IF Q328_1E = 1]                                                                           | __/__/__ YEARS |
|      | Q329_1FF Age unspecified arthritis began [IF Q327 = 1 AND Q328_1A TO Q328_1E ≠ 1]                                                   | __/__/__ YEARS |
|      | Q329_1FR Age unspecified arthritis most recent [IF Q327 = 1 AND Q328_1A TO Q328_1E ≠ 1]                                             | __/__/__ YEARS |
|      | Q329_2F Age ankylosing spondylitis began [IF Q327 = 2]                                                                              | __/__/__ YEARS |
|      | Q329_2R Age ankylosing spondylitis most recent [IF Q327 = 2]                                                                        | __/__/__ YEARS |
|      | Q329_3F Age back problems began [IF Q327 = 3]                                                                                       | __/__/__ YEARS |
|      | Q329_3R Age back problems most recent [IF Q327 = 3]                                                                                 | __/__/__ YEARS |
|      | Q329_4F Age Barrett's oesophagus began [IF Q327 = 4]                                                                                | __/__/__ YEARS |
|      | Q329_4R Age Barrett's oesophagus most recent [IF Q327 = 4]                                                                          | __/__/__ YEARS |
|      | Q329_5AF Age bladder cancer began [IF Q328_5A = 1]                                                                                  | __/__/__ YEARS |
|      | Q329_5AR Age bladder cancer most recent [IF Q328_5A = 1]                                                                            | __/__/__ YEARS |
|      | Q329_5BF Age bowel (colorectal) cancer began [IF Q328_5B = 1]                                                                       | __/__/__ YEARS |
|      | Q329_5BR Age bladder cancer most recent [IF Q328_5B = 1]                                                                            | __/__/__ YEARS |
|      | Q329_5CF Age brain cancer began [IF Q328_5C = 1]                                                                                    | __/__/__ YEARS |
|      | Q329_5CR Age brain cancer most recent [IF Q328_5C = 1]                                                                              | __/__/__ YEARS |
|      | Q329_5DF Age breast cancer began [IF Q328_5D = 1]                                                                                   | __/__/__ YEARS |
|      | Q329_5DR Age breast cancer most recent [IF Q328_5D = 1]                                                                             | __/__/__ YEARS |
|      | Q329_5EF Age cervical cancer began [IF Q328_5E = 1]                                                                                 | __/__/__ YEARS |



|                                                                                      |               |
|--------------------------------------------------------------------------------------|---------------|
| Q329_5ER Age cervical cancer most recent [IF Q328_5E = 1]                            | _/_/_/ YEAARS |
| Q329_5FF Age endometrial cancer began [IF Q328_5F = 1]                               | _/_/_/ YEAARS |
| Q329_5FR Age endometrial cancer most recent [IF Q328_5F = 1]                         | _/_/_/ YEAARS |
| Q329_5GF Age kidney cancer began [IF Q328_5G = 1]                                    | _/_/_/ YEAARS |
| Q329_5GR Age kidney cancer most recent [IF Q328_5G = 1]                              | _/_/_/ YEAARS |
| Q329_5HF Age leukemia began [IF Q328_5H = 1]                                         | _/_/_/ YEAARS |
| Q329_5HR Age leukemia most recent [IF Q328_5H = 1]                                   | _/_/_/ YEAARS |
| Q329_5IF Age liver cancer began [IF Q328_5I = 1]                                     | _/_/_/ YEAARS |
| Q329_5IR Age liver cancer most recent [IF Q328_5I = 1]                               | _/_/_/ YEAARS |
| Q329_5JF Age lung cancer began [IF Q328_5J = 1]                                      | _/_/_/ YEAARS |
| Q329_5JR Age lung cancer most recent [IF Q328_5J = 1]                                | _/_/_/ YEAARS |
| Q329_5KF Age lymphoma began [IF Q328_5K = 1]                                         | _/_/_/ YEAARS |
| Q329_5KR Age lymphoma most recent [IF Q328_5K = 1]                                   | _/_/_/ YEAARS |
| Q329_5LF Age melanoma began [IF Q328_5L = 1]                                         | _/_/_/ YEAARS |
| Q329_5LR Age melanoma most recent [IF Q328_5L = 1]                                   | _/_/_/ YEAARS |
| Q329_5MF Age skin cancer other than melanoma began [IF Q328_5M = 1]                  | _/_/_/ YEAARS |
| Q329_5MR Age skin cancer other than melanoma most recent [IF Q328_5M = 1]            | _/_/_/ YEAARS |
| Q329_5NF Age oesophageal cancer began [IF Q328_5N = 1]                               | _/_/_/ YEAARS |
| Q329_5NR Age oesophageal cancer most recent [IF Q328_5N = 1]                         | _/_/_/ YEAARS |
| Q329_5OF Age ovarian cancer began [IF Q328_5O = 1]                                   | _/_/_/ YEAARS |
| Q329_5OR Age ovarian cancer most recent [IF Q328_5O = 1]                             | _/_/_/ YEAARS |
| Q329_5PF Age pancreatic cancer began [IF Q328_5P = 1]                                | _/_/_/ YEAARS |
| Q329_5PR Age pancreatic cancer most recent [IF Q328_5P = 1]                          | _/_/_/ YEAARS |
| Q329_5QF Age prostate cancer began [IF Q328_5Q = 1]                                  | _/_/_/ YEAARS |
| Q329_5QR Age prostate cancer most recent [IF Q328_5Q = 1]                            | _/_/_/ YEAARS |
| Q329_5RF Age other cancer began [IF Q328_5R = 1]                                     | _/_/_/ YEAARS |
| Q329_5RR Age other cancer most recent [IF Q328_5R = 1]                               | _/_/_/ YEAARS |
| Q329_5SF Age unspecified cancer began [IF Q327 = 5 AND Q328_5A TO Q328_5R ≠ 1]       | _/_/_/ YEAARS |
| Q329_5SR Age unspecified cancer most recent [IF Q327 = 5 AND Q328_5A TO Q328_5R ≠ 1] | _/_/_/ YEAARS |
| Q329_6F Age chronic fatigue syndrome began [IF Q327 = 6]                             | _/_/_/ YEAARS |

|                                                                                                                         |                |
|-------------------------------------------------------------------------------------------------------------------------|----------------|
| Q329_6R Age chronic fatigue syndrome most recent [IF Q327 = 6]                                                          | __/__/__ YEARS |
| Q329_7AF Age emphysema began [IF Q328_7A = 1]                                                                           | __/__/__ YEARS |
| Q329_7AR Age emphysema most recent [IF Q328_7A = 1]                                                                     | __/__/__ YEARS |
| Q329_7BF Age chronic bronchitis began [IF Q328_7B = 1]                                                                  | __/__/__ YEARS |
| Q329_7BR Age chronic bronchitis most recent [IF Q328_7B = 1]                                                            | __/__/__ YEARS |
| Q329_7CF Age other chronic lung disease began [IF Q328_7C = 1]                                                          | __/__/__ YEARS |
| Q329_7CR Age other chronic lung disease most recent [IF Q328_7C = 1]                                                    | __/__/__ YEARS |
| Q329_7DF Age unspecified chronic lung disease began [IF Q327 = 7<br>AND Q328_7A TO Q328_7C ≠ 1]                         | __/__/__ YEARS |
| Q329_7DR Age unspecified chronic lung disease most recent<br>[IF Q327 = 7 AND Q328_7A TO Q328_7C ≠ 1]                   | __/__/__ YEARS |
| Q329_8F Age coeliac disease began [IF Q327 = 8]                                                                         | __/__/__ YEARS |
| Q329_8R Age coeliac disease most recent [IF Q327 = 8]                                                                   | __/__/__ YEARS |
| Q329_9F Age Crohn's disease began [IF Q327 = 9]                                                                         | __/__/__ YEARS |
| Q329_9R Age Crohn's disease most recent [IF Q327 = 9]                                                                   | __/__/__ YEARS |
| Q329_10F Age ulcerative colitis began [IF Q327 = 10]                                                                    | __/__/__ YEARS |
| Q329_10R Age ulcerative colitis most recent [IF Q327 = 10]                                                              | __/__/__ YEARS |
| Q329_11AF Age Type 1 diabetes began [IF Q328_11A = 1]                                                                   | __/__/__ YEARS |
| Q329_11AR Age Type 1 diabetes most recent [IF Q328_11A = 1]                                                             | __/__/__ YEARS |
| Q329_11BF Age Type 2 diabetes began [IF Q328_11B = 1]                                                                   | __/__/__ YEARS |
| Q329_11BR Age Type 2 diabetes most recent [IF Q328_11B = 1]                                                             | __/__/__ YEARS |
| Q329_11CF Age gestational diabetes began [IF Q328_11C = 1]                                                              | __/__/__ YEARS |
| Q329_11CR Age gestational diabetes most recent [IF Q328_11C = 1]                                                        | __/__/__ YEARS |
| Q329_11DF Age other diabetes or high blood sugar began<br>[IF Q328_11D = 1]                                             | __/__/__ YEARS |
| Q329_11DR Age other diabetes or high blood sugar most recent<br>[IF Q328_11D = 1]                                       | __/__/__ YEARS |
| Q329_11EF Age unspecified diabetes or other high blood sugar began<br>[IF Q327 = 11 AND Q328_11A TO Q328_11D ≠ 1]       | __/__/__ YEARS |
| Q329_11ER Age unspecified diabetes or other high blood sugar most<br>recent [IF Q327 = 11 AND Q328_11A TO Q328_11D ≠ 1] | __/__/__ YEARS |
| Q329_12F Age epilepsy or seizure disorder began [IF Q327 = 10]                                                          | __/__/__ YEARS |
| Q329_12R Age epilepsy or seizure disorder most recent [IF Q327 = 10]                                                    | __/__/__ YEARS |
| Q329_13AF Age long-sighted (e.g. glasses for reading) began<br>[IF Q328_13A = 1]                                        | __/__/__ YEARS |

|                                                                                               |                |
|-----------------------------------------------------------------------------------------------|----------------|
| Q329_13AR Age long-sighted (e.g. glasses for reading) most recent [IF Q328_13A = 1]           | __/__/__ YEARS |
| Q329_13BF Age short-sighted (e.g. glasses for distance) began [IF Q328_13B = 1]               | __/__/__ YEARS |
| Q329_13BR Age short-sighted (e.g. glasses for distance) most recent [IF Q328_13B = 1]         | __/__/__ YEARS |
| Q329_13CF Age astigmatism began [IF Q328_13C = 1]                                             | __/__/__ YEARS |
| Q329_13CR Age astigmatism most recent [IF Q328_13C = 1]                                       | __/__/__ YEARS |
| Q329_13DF Age cataracts began [IF Q328_13D = 1]                                               | __/__/__ YEARS |
| Q329_13DR Age cataracts most recent [IF Q328_13D = 1]                                         | __/__/__ YEARS |
| Q329_13EF Age glaucoma began [IF Q328_13E = 1]                                                | __/__/__ YEARS |
| Q329_13ER Age glaucoma most recent [IF Q328_13E = 1]                                          | __/__/__ YEARS |
| Q329_13FF Age macular degeneration began [IF Q328_13F = 1]                                    | __/__/__ YEARS |
| Q329_13FR Age macular degeneration most recent [IF Q328_13F = 1]                              | __/__/__ YEARS |
| Q329_13GF Age pterygium began [IF Q328_13G = 1]                                               | __/__/__ YEARS |
| Q329_13GR Age pterygium most recent [IF Q328_13G = 1]                                         | __/__/__ YEARS |
| Q329_13HF Age strabismus (“turned” or “lazy” eye) began [IF Q328_13H = 1]                     | __/__/__ YEARS |
| Q329_13HR Age strabismus (“turned” or “lazy” eye) most recent [IF Q328_13H = 1]               | __/__/__ YEARS |
| Q329_13IF Age other eye problem began [IF Q328_13I = 1]                                       | __/__/__ YEARS |
| Q329_13IR Age other eye problem most recent [IF Q328_13I = 1]                                 | __/__/__ YEARS |
| Q329_13JF Age unspecified eye problem began [IF Q327 = 13 AND Q328_13A TO Q328_13I ≠ 1]       | __/__/__ YEARS |
| Q329_13JR Age unspecified eye problem most recent [IF Q327 = 13 AND Q328_13A TO Q328_13I ≠ 1] | __/__/__ YEARS |
| Q329_14F Age gallstones began [IF Q327 = 14]                                                  | __/__/__ YEARS |
| Q329_14R Age gallstones most recent [IF Q327 = 14]                                            | __/__/__ YEARS |
| Q329_15F Age Graves’ disease began [IF Q327 = 15]                                             | __/__/__ YEARS |
| Q329_15R Age Graves’ disease most recent [IF Q327 = 15]                                       | __/__/__ YEARS |
| Q329_16F Age Hashimoto’s disease began [IF Q327 = 16]                                         | __/__/__ YEARS |
| Q329_16R Age Hashimoto’s disease most recent [IF Q327 = 16]                                   | __/__/__ YEARS |
| Q329_17F Age heart attack began [IF Q327 = 17]                                                | __/__/__ YEARS |
| Q329_17R Age heart attack most recent [IF Q327 = 17]                                          | __/__/__ YEARS |
| Q329_18F Age heart disease began [IF Q327 = 18]                                               | __/__/__ YEARS |

|                                                             |              |
|-------------------------------------------------------------|--------------|
| Q329_18R Age heart disease most recent [IF Q327 = 18]       | _/_/_/ YEARS |
| Q329_19F Age high blood pressure began [IF Q327 = 19]       | _/_/_/ YEARS |
| Q329_19R Age high blood pressure most recent [IF Q327 = 19] | _/_/_/ YEARS |
| Q329_20F Age HIV infection began [IF Q327 = 20]             | _/_/_/ YEARS |
| Q329_20R Age HIV infection most recent [IF Q327 = 20]       | _/_/_/ YEARS |
| Q329_21F Age kidney disease began [IF Q327 = 21]            | _/_/_/ YEARS |
| Q329_21R Age kidney disease most recent [IF Q327 = 21]      | _/_/_/ YEARS |
| Q329_22F Age lupus (SLE) began [IF Q327 = 22]               | _/_/_/ YEARS |
| Q329_22R Age lupus (SLE) most recent [IF Q327 = 22]         | _/_/_/ YEARS |
| Q329_23F Age lymphoedema began [IF Q327 = 23]               | _/_/_/ YEARS |
| Q329_23R Age lymphoedema most recent [IF Q327 = 23]         | _/_/_/ YEARS |
| Q329_24F Age multiple sclerosis began [IF Q327 = 24]        | _/_/_/ YEARS |
| Q329_24R Age multiple sclerosis most recent [IF Q327 = 24]  | _/_/_/ YEARS |
| Q329_25F Age neck problems began [IF Q327 = 25]             | _/_/_/ YEARS |
| Q329_25R Age neck problems most recent [IF Q327 = 25]       | _/_/_/ YEARS |
| Q329_26F Age osteoporosis began [IF Q327 = 26]              | _/_/_/ YEARS |
| Q329_26R Age osteoporosis most recent [IF Q327 = 26]        | _/_/_/ YEARS |
| Q329_27F Age psoriasis began [IF Q327 = 27]                 | _/_/_/ YEARS |
| Q329_27R Age psoriasis most recent [IF Q327 = 27]           | _/_/_/ YEARS |
| Q329_28F Age reflux began [IF Q327 = 28]                    | _/_/_/ YEARS |
| Q329_28R Age reflux most recent [IF Q327 = 28]              | _/_/_/ YEARS |
| Q329_29F Age seasonal allergies began [IF Q327 = 29]        | _/_/_/ YEARS |
| Q329_29R Age seasonal allergies most recent [IF Q327 = 29]  | _/_/_/ YEARS |
| Q329_30F Age Sjögren's syndrome began [IF Q327 = 30]        | _/_/_/ YEARS |
| Q329_30R Age Sjögren's syndrome most recent [IF Q327 = 30]  | _/_/_/ YEARS |
| Q329_31F Age stroke began [IF Q327 = 31]                    | _/_/_/ YEARS |
| Q329_31R Age stroke most recent [IF Q327 = 31]              | _/_/_/ YEARS |
| Q329_32F Age tuberculosis began [IF Q327 = 32]              | _/_/_/ YEARS |
| Q329_32R Age tuberculosis most recent [IF Q327 = 32]        | _/_/_/ YEARS |
| Q329_33AF Age mouth ulcers began [IF Q328_33A = 1]          | _/_/_/ YEARS |
| Q329_33AR Age mouth ulcers most recent [IF Q328_33A = 1]    | _/_/_/ YEARS |

|           |                                                                                                |                                                                                                                        |
|-----------|------------------------------------------------------------------------------------------------|------------------------------------------------------------------------------------------------------------------------|
| Q329_33BF | Age leg ulcers began [IF Q328_33B = 1]                                                         | ___/___/___ YEARS                                                                                                      |
| Q329_33BR | Age leg ulcers most recent [IF Q328_33B = 1]                                                   | ___/___/___ YEARS                                                                                                      |
| Q329_33CF | Age stomach (gastric) ulcers began [IF Q328_33C = 1]                                           | ___/___/___ YEARS                                                                                                      |
| Q329_33CR | Age stomach (gastric) ulcers most recent [IF Q328_33C = 1]                                     | ___/___/___ YEARS                                                                                                      |
| Q329_33DF | Age duodenal ulcers began [IF Q328_33D = 1]                                                    | ___/___/___ YEARS                                                                                                      |
| Q329_33DR | Age duodenal ulcers most recent [IF Q328_33D = 1]                                              | ___/___/___ YEARS                                                                                                      |
| Q329_33EF | Age other ulcers began [IF Q328_33E = 1]                                                       | ___/___/___ YEARS                                                                                                      |
| Q329_33ER | Age other ulcers most recent [IF Q328_33E = 1]                                                 | ___/___/___ YEARS                                                                                                      |
| Q329_33FF | Age unspecified ulcers began<br>[IF Q327 = 13 AND Q328_33A TO Q328_33E ≠ 1]                    | ___/___/___ YEARS                                                                                                      |
| Q329_33FR | Age unspecified eye problem most recent<br>[IF Q327 = 13 AND Q328_33A TO Q328_33F ≠ 1]         | ___/___/___ YEARS                                                                                                      |
| Q329_34F  | Age any other chronic pain began [IF Q327 = 34]                                                | ___/___/___ YEARS                                                                                                      |
| Q329_34R  | Age any other chronic pain most recent [IF Q327 = 34]                                          | ___/___/___ YEARS                                                                                                      |
| Q329_35F  | Age other condition began [IF Q327 = 35]                                                       | ___/___/___ YEARS                                                                                                      |
| Q329_35R  | Age other condition most recent [IF Q327 = 35]                                                 | ___/___/___ YEARS                                                                                                      |
| <hr/>     |                                                                                                |                                                                                                                        |
| Q330      | From any experiences in the air, how often would you say you get airsick?                      | Always .....1<br>Frequently .....2<br>Sometimes .....3<br>Rarely .....4<br>Never .....5<br>Never flown .....6          |
| <hr/>     |                                                                                                |                                                                                                                        |
| Q331      | From any experiences at sea, how often would you say you get seasick?                          | Always .....1<br>Frequently .....2<br>Sometimes .....3<br>Rarely .....4<br>Never .....5<br>Never been on a boat .....6 |
| <hr/>     |                                                                                                |                                                                                                                        |
| Q332      | From any experiences riding in cars when not driving, how often would you say you get carsick? | Always .....1<br>Frequently .....2<br>Sometimes .....3<br>Rarely .....4<br>Never .....5                                |
| <hr/>     |                                                                                                |                                                                                                                        |

|      |                                                                                                                                                                                                                                                                      |                                                                                                                                                                        |
|------|----------------------------------------------------------------------------------------------------------------------------------------------------------------------------------------------------------------------------------------------------------------------|------------------------------------------------------------------------------------------------------------------------------------------------------------------------|
| Q333 | We are interested in finding out about any chronic pain you experience in your daily life. On a scale of 0 – 10, what is your pain on average? Please click or tap on the shaded line under your chosen number to register your response, even if the answer is “0”. | No pain 0 .....1<br>1 .....2<br>2 .....3<br>3 .....4<br>4 .....5<br>5 .....6<br>6 .....7<br>7 .....8<br>8 .....9<br>9 .....10<br>Pain as bad as it could be 10 .....11 |
|------|----------------------------------------------------------------------------------------------------------------------------------------------------------------------------------------------------------------------------------------------------------------------|------------------------------------------------------------------------------------------------------------------------------------------------------------------------|

\*\*\*\*\*  
 IF AT LEAST SOME PAIN ON AVERAGE (Q333 > 0) CONTINUE,  
 ELSE GO TO Q339  
 \*\*\*\*\*

---

|      |                                                                                                                                                               |                                                                                                                                                                        |
|------|---------------------------------------------------------------------------------------------------------------------------------------------------------------|------------------------------------------------------------------------------------------------------------------------------------------------------------------------|
| Q334 | How would you rate your pain right now? Please click or tap on the shaded line under your chosen number to register your response, even if the answer is “0”. | No pain 0 .....1<br>1 .....2<br>2 .....3<br>3 .....4<br>4 .....5<br>5 .....6<br>6 .....7<br>7 .....8<br>8 .....9<br>9 .....10<br>Pain as bad as it could be 10 .....11 |
|------|---------------------------------------------------------------------------------------------------------------------------------------------------------------|------------------------------------------------------------------------------------------------------------------------------------------------------------------------|

---

|      |                                                  |                                                                                                                                                                                                                          |
|------|--------------------------------------------------|--------------------------------------------------------------------------------------------------------------------------------------------------------------------------------------------------------------------------|
| Q335 | How long has your <b>main</b> pain been present? | Less than 1 month .....1<br>Between 1 and 3 months .....2<br>Between 3 and 6 months .....3<br>Between 6 and 12 months .....4<br>Between 1 and 2 years .....5<br>Between 2 and 5 years .....6<br>More than 5 years .....7 |
|------|--------------------------------------------------|--------------------------------------------------------------------------------------------------------------------------------------------------------------------------------------------------------------------------|

---

|      |                                           |                                                                                                                                                                                                                                                                                                                                       |
|------|-------------------------------------------|---------------------------------------------------------------------------------------------------------------------------------------------------------------------------------------------------------------------------------------------------------------------------------------------------------------------------------------|
| Q336 | Which statement best describes your pain? | Always present (always the same intensity) .....1<br>Always present (level of pain varies) .....2<br>Often present (pain-free periods last less than 6 hours) .....3<br>Occasionally present (pain occurs once to several times per day, lasting up to an hour) .....4<br>Rarely present (pain occurs every few days or weeks) .....5 |
|------|-------------------------------------------|---------------------------------------------------------------------------------------------------------------------------------------------------------------------------------------------------------------------------------------------------------------------------------------------------------------------------------------|

---

Q337 On the diagram, please click or tap on the area where your main pain occurs.

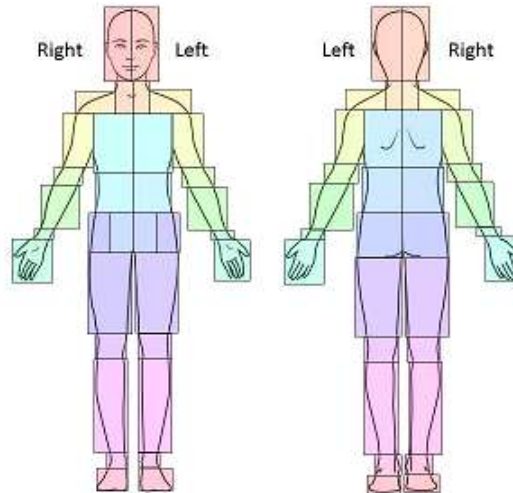

|                                |           |   |
|--------------------------------|-----------|---|
| Q337A_RF Head right front      | No .....  | 1 |
|                                | Yes ..... | 2 |
| Q337A_LF Head left front       | No .....  | 1 |
|                                | Yes ..... | 2 |
| Q337A_LB Head left back        | No .....  | 1 |
|                                | Yes ..... | 2 |
| Q337A_RB Head right back       | No .....  | 1 |
|                                | Yes ..... | 2 |
| Q337B_RF Neck right front      | No .....  | 1 |
|                                | Yes ..... | 2 |
| Q337B_LF Neck left front       | No .....  | 1 |
|                                | Yes ..... | 2 |
| Q337B_LB Neck left back        | No .....  | 1 |
|                                | Yes ..... | 2 |
| Q337B_RB Neck right back       | No .....  | 1 |
|                                | Yes ..... | 2 |
| Q337C_RF Shoulder right front  | No .....  | 1 |
|                                | Yes ..... | 2 |
| Q337C_LF Shoulder left front   | No .....  | 1 |
|                                | Yes ..... | 2 |
| Q337C_LB Shoulder left back    | No .....  | 1 |
|                                | Yes ..... | 2 |
| Q337C_RB Shoulder right back   | No .....  | 1 |
|                                | Yes ..... | 2 |
| Q337D_RF Upper arm right front | No .....  | 1 |
|                                | Yes ..... | 2 |
| Q337D_LF Upper arm left front  | No .....  | 1 |
|                                | Yes ..... | 2 |

|                                |                         |
|--------------------------------|-------------------------|
| Q337D_LB Upper arm left back   | No .....1<br>Yes .....2 |
| Q337D_RB Upper arm right back  | No .....1<br>Yes .....2 |
| Q337E_RF Elbow right front     | No .....1<br>Yes .....2 |
| Q337E_LF Elbow left front      | No .....1<br>Yes .....2 |
| Q337E_LB Elbow left back       | No .....1<br>Yes .....2 |
| Q337E_RB Elbow right back      | No .....1<br>Yes .....2 |
| Q337F_RF Lower arm right front | No .....1<br>Yes .....2 |
| Q337F_LF Lower arm left front  | No .....1<br>Yes .....2 |
| Q337F_LB Lower arm left back   | No .....1<br>Yes .....2 |
| Q337F_RB Lower arm right back  | No .....1<br>Yes .....2 |
| Q337G_RF Wrist right front     | No .....1<br>Yes .....2 |
| Q337G_LF Wrist left front      | No .....1<br>Yes .....2 |
| Q337G_LB Wrist left back       | No .....1<br>Yes .....2 |
| Q337G_RB Wrist right back      | No .....1<br>Yes .....2 |
| Q337H_RF Hand right front      | No .....1<br>Yes .....2 |
| Q337H_LF Hand left front       | No .....1<br>Yes .....2 |
| Q337H_LB Hand left back        | No .....1<br>Yes .....2 |
| Q337H_RB Hand right back       | No .....1<br>Yes .....2 |
| Q337I_R Chest right            | No .....1<br>Yes .....2 |
| Q337I_L Chest left             | No .....1<br>Yes .....2 |
| Q337J_R Abdomen right          | No .....1<br>Yes .....2 |



|                                |           |   |
|--------------------------------|-----------|---|
| Q337J_L Abdomen left           | No .....  | 1 |
|                                | Yes ..... | 2 |
| Q337K_L Upper back left        | No .....  | 1 |
|                                | Yes ..... | 2 |
| Q337K_R Upper back right       | No .....  | 1 |
|                                | Yes ..... | 2 |
| Q337L_L Lower back left        | No .....  | 1 |
|                                | Yes ..... | 2 |
| Q337L_R Lower back right       | No .....  | 1 |
|                                | Yes ..... | 2 |
| Q337M_R Groin right            | No .....  | 1 |
|                                | Yes ..... | 2 |
| Q337M_L Groin left             | No .....  | 1 |
|                                | Yes ..... | 2 |
| Q337N_L Bottom left            | No .....  | 1 |
|                                | Yes ..... | 2 |
| Q337N_R Bottom right           | No .....  | 1 |
|                                | Yes ..... | 2 |
| Q337O_R Hip right              | No .....  | 1 |
|                                | Yes ..... | 2 |
| Q337O_L Hip left               | No .....  | 1 |
|                                | Yes ..... | 2 |
| Q337P_RF Upper leg right front | No .....  | 1 |
|                                | Yes ..... | 2 |
| Q337P_LF Upper leg left front  | No .....  | 1 |
|                                | Yes ..... | 2 |
| Q337P_LB Upper leg left back   | No .....  | 1 |
|                                | Yes ..... | 2 |
| Q337P_RB Upper leg right back  | No .....  | 1 |
|                                | Yes ..... | 2 |
| Q337Q_RF Knee right front      | No .....  | 1 |
|                                | Yes ..... | 2 |
| Q337Q_LF Knee left front       | No .....  | 1 |
|                                | Yes ..... | 2 |
| Q337Q_LB Knee left back        | No .....  | 1 |
|                                | Yes ..... | 2 |
| Q337Q_RB Knee right back       | No .....  | 1 |
|                                | Yes ..... | 2 |
| Q337R_RF Lower leg right front | No .....  | 1 |
|                                | Yes ..... | 2 |
| Q337R_LF Lower leg left front  | No .....  | 1 |
|                                | Yes ..... | 2 |

|                               |           |   |
|-------------------------------|-----------|---|
| Q337R_LB Lower leg left back  | No .....  | 1 |
|                               | Yes ..... | 2 |
| Q337R_RB Lower leg right back | No .....  | 1 |
|                               | Yes ..... | 2 |
| Q337S_RF Ankle right front    | No .....  | 1 |
|                               | Yes ..... | 2 |
| Q337S_LF Ankle left front     | No .....  | 1 |
|                               | Yes ..... | 2 |
| Q337S_LB Ankle left back      | No .....  | 1 |
|                               | Yes ..... | 2 |
| Q337S_RB Ankle right back     | No .....  | 1 |
|                               | Yes ..... | 2 |
| Q337T_RF Foot right front     | No .....  | 1 |
|                               | Yes ..... | 2 |
| Q337T_LF Foot left front      | No .....  | 1 |
|                               | Yes ..... | 2 |
| Q337T_LB Foot left back       | No .....  | 1 |
|                               | Yes ..... | 2 |
| Q337T_RB Foot right back      | No .....  | 1 |
|                               | Yes ..... | 2 |

---

Q338 On the diagram, please click or tap on any other areas where you experience pain.



|                                |           |   |
|--------------------------------|-----------|---|
| Q338A_RF Head right front      | No .....  | 1 |
|                                | Yes ..... | 2 |
| Q338A_LF Head left front       | No .....  | 1 |
|                                | Yes ..... | 2 |
| Q338A_LB Head left back        | No .....  | 1 |
|                                | Yes ..... | 2 |
| Q338A_RB Head right back       | No .....  | 1 |
|                                | Yes ..... | 2 |
| Q338B_RF Neck right front      | No .....  | 1 |
|                                | Yes ..... | 2 |
| Q338B_LF Neck left front       | No .....  | 1 |
|                                | Yes ..... | 2 |
| Q338B_LB Neck left back        | No .....  | 1 |
|                                | Yes ..... | 2 |
| Q338B_RB Neck right back       | No .....  | 1 |
|                                | Yes ..... | 2 |
| Q338C_RF Shoulder right front  | No .....  | 1 |
|                                | Yes ..... | 2 |
| Q338C_LF Shoulder left front   | No .....  | 1 |
|                                | Yes ..... | 2 |
| Q338C_LB Shoulder left back    | No .....  | 1 |
|                                | Yes ..... | 2 |
| Q338C_RB Shoulder right back   | No .....  | 1 |
|                                | Yes ..... | 2 |
| Q338D_RF Upper arm right front | No .....  | 1 |
|                                | Yes ..... | 2 |
| Q338D_LF Upper arm left front  | No .....  | 1 |
|                                | Yes ..... | 2 |

|                                |            |
|--------------------------------|------------|
| Q338D_LB Upper arm left back   | No .....1  |
|                                | Yes .....2 |
| Q338D_RB Upper arm right back  | No .....1  |
|                                | Yes .....2 |
| Q338E_RF Elbow right front     | No .....1  |
|                                | Yes .....2 |
| Q338E_LF Elbow left front      | No .....1  |
|                                | Yes .....2 |
| Q338E_LB Elbow left back       | No .....1  |
|                                | Yes .....2 |
| Q338E_RB Elbow right back      | No .....1  |
|                                | Yes .....2 |
| Q338F_RF Lower arm right front | No .....1  |
|                                | Yes .....2 |
| Q338F_LF Lower arm left front  | No .....1  |
|                                | Yes .....2 |
| Q338F_LB Lower arm left back   | No .....1  |
|                                | Yes .....2 |
| Q338F_RB Lower arm right back  | No .....1  |
|                                | Yes .....2 |
| Q338G_RF Wrist right front     | No .....1  |
|                                | Yes .....2 |
| Q338G_LF Wrist left front      | No .....1  |
|                                | Yes .....2 |
| Q338G_LB Wrist left back       | No .....1  |
|                                | Yes .....2 |
| Q338G_RB Wrist right back      | No .....1  |
|                                | Yes .....2 |
| Q338H_RF Hand right front      | No .....1  |
|                                | Yes .....2 |
| Q338H_LF Hand left front       | No .....1  |
|                                | Yes .....2 |
| Q338H_LB Hand left back        | No .....1  |
|                                | Yes .....2 |
| Q338H_RB Hand right back       | No .....1  |
|                                | Yes .....2 |
| Q338I_R Chest right            | No .....1  |
|                                | Yes .....2 |
| Q338I_L Chest left             | No .....1  |
|                                | Yes .....2 |
| Q338J_R Abdomen right          | No .....1  |
|                                | Yes .....2 |

|                                |           |   |
|--------------------------------|-----------|---|
| Q338J_L Abdomen left           | No .....  | 1 |
|                                | Yes ..... | 2 |
| Q338K_L Upper back left        | No .....  | 1 |
|                                | Yes ..... | 2 |
| Q338K_R Upper back right       | No .....  | 1 |
|                                | Yes ..... | 2 |
| Q338L_L Lower back left        | No .....  | 1 |
|                                | Yes ..... | 2 |
| Q338L_R Lower back right       | No .....  | 1 |
|                                | Yes ..... | 2 |
| Q338M_R Groin right            | No .....  | 1 |
|                                | Yes ..... | 2 |
| Q338M_L Groin left             | No .....  | 1 |
|                                | Yes ..... | 2 |
| Q338N_L Bottom left            | No .....  | 1 |
|                                | Yes ..... | 2 |
| Q338N_R Bottom right           | No .....  | 1 |
|                                | Yes ..... | 2 |
| Q338O_R Hip right              | No .....  | 1 |
|                                | Yes ..... | 2 |
| Q338O_L Hip left               | No .....  | 1 |
|                                | Yes ..... | 2 |
| Q338P_RF Upper leg right front | No .....  | 1 |
|                                | Yes ..... | 2 |
| Q338P_LF Upper leg left front  | No .....  | 1 |
|                                | Yes ..... | 2 |
| Q338P_LB Upper leg left back   | No .....  | 1 |
|                                | Yes ..... | 2 |
| Q338P_RB Upper leg right back  | No .....  | 1 |
|                                | Yes ..... | 2 |
| Q338Q_RF Knee right front      | No .....  | 1 |
|                                | Yes ..... | 2 |
| Q338Q_LF Knee left front       | No .....  | 1 |
|                                | Yes ..... | 2 |
| Q338Q_LB Knee left back        | No .....  | 1 |
|                                | Yes ..... | 2 |
| Q338Q_RB Knee right back       | No .....  | 1 |
|                                | Yes ..... | 2 |
| Q338R_RF Lower leg right front | No .....  | 1 |
|                                | Yes ..... | 2 |
| Q338R_LF Lower leg left front  | No .....  | 1 |
|                                | Yes ..... | 2 |

|                                                                                                                 |                                                                                                                                                                                                 |
|-----------------------------------------------------------------------------------------------------------------|-------------------------------------------------------------------------------------------------------------------------------------------------------------------------------------------------|
| Q338R_LB Lower leg left back                                                                                    | No .....1<br>Yes .....2                                                                                                                                                                         |
| Q338R_RB Lower leg right back                                                                                   | No .....1<br>Yes .....2                                                                                                                                                                         |
| Q338S_RF Ankle right front                                                                                      | No .....1<br>Yes .....2                                                                                                                                                                         |
| Q338S_LF Ankle left front                                                                                       | No .....1<br>Yes .....2                                                                                                                                                                         |
| Q338S_LB Ankle left back                                                                                        | No .....1<br>Yes .....2                                                                                                                                                                         |
| Q338S_RB Ankle right back                                                                                       | No .....1<br>Yes .....2                                                                                                                                                                         |
| Q338T_RF Foot right front                                                                                       | No .....1<br>Yes .....2                                                                                                                                                                         |
| Q338T_LF Foot left front                                                                                        | No .....1<br>Yes .....2                                                                                                                                                                         |
| Q338T_LB Foot left back                                                                                         | No .....1<br>Yes .....2                                                                                                                                                                         |
| Q338T_RB Foot right back                                                                                        | No .....1<br>Yes .....2                                                                                                                                                                         |
| <hr/>                                                                                                           |                                                                                                                                                                                                 |
| Q339 Have you ever worn prescription glasses or contact lenses?                                                 | No .....1<br>Yes .....2                                                                                                                                                                         |
| *****<br>IF EVER USED GLASSES OR CONTACT LENSES (Q339 = 2) CONTINUE<br>ELSE GO TO Q342<br>*****                 |                                                                                                                                                                                                 |
| <hr/>                                                                                                           |                                                                                                                                                                                                 |
| Q340 At what age did you first wear prescription glasses or contact lenses?                                     | ___/___ YEARS                                                                                                                                                                                   |
| <hr/>                                                                                                           |                                                                                                                                                                                                 |
| Q341 For what purpose did you first wear prescription glasses or contact lenses? (Please select all that apply) | To see clearly at a distance .....1<br>For reading, computer use,<br>or other close work .....2<br>To correct astigmatism (blurred<br>or distorted vision at all distances) ..3<br>Other .....4 |
| <hr/>                                                                                                           |                                                                                                                                                                                                 |
| Q342 How is your hearing?                                                                                       | Good .....1<br>Slightly impaired .....2<br>Very impaired .....3                                                                                                                                 |
| <hr/>                                                                                                           |                                                                                                                                                                                                 |
| Q343 Is it difficult for you to hear when talking with one person in a quiet room?                              | No, not at all .....1<br>Sometimes a bit difficult .....2<br>Yes, very difficult .....3                                                                                                         |
| <hr/>                                                                                                           |                                                                                                                                                                                                 |

Q344 Is it difficult for you to hear when talking with several people at the same time? No, not at all .....1  
Sometimes a bit difficult .....2  
Yes, very difficult .....3

---

Q345 Do you have a constant ringing or some other disturbing sound in your ears (tinnitus)? No .....1  
Yes, sometimes, but the sound does not disturb me .....2  
All the time, the sound is very disturbing .....3

---

Q346 Thank you for answering this section of the questionnaire. It's a big help to our research!

---

## Module 9 – Games and gambling

Q375 We would like to ask you about your experiences with various kinds of gambling. By gambling we mean placing a bet on the outcome of a race or a game of skill or chance, or playing a game, including for charity, in which you might win or lose your money. Do not count any gambling that you may have done for a prize other than money, such as a car raffle.

Q376 Have you ever participated in any of the following activities? Please select all that apply.

|                                                                                                                       |           |   |
|-----------------------------------------------------------------------------------------------------------------------|-----------|---|
| Q376A Played electronic gaming machines such as pokies, poker machines, video draw poker, or blackjack                | Yes ..... | 1 |
| Q376B Bet on horse or greyhound races excluding sweeps                                                                | Yes ..... | 1 |
| Q376C Bought instant scratch tickets                                                                                  | Yes ..... | 1 |
| Q376D Played lotto or any other lottery game like Tattsлото, Powerball, the Pools, \$2 Jackpot lottery, or Tatts Keno | Yes ..... | 1 |
| Q376E Played Keno at a club, hotel or casino                                                                          | Yes ..... | 1 |
| Q376F Played poker for money against other individuals                                                                | Yes ..... | 1 |
| Q376G Played table games at a casino (not including poker), such as Blackjack or Roulette                             | Yes ..... | 1 |
| Q376H Played casino games on the internet                                                                             | Yes ..... | 1 |
| Q376I Played bingo at a club or hall (for cash prizes)                                                                | Yes ..... | 1 |
| Q376J Bet on a sporting event like football, cricket or tennis                                                        | Yes ..... | 1 |
| Q376K Played games like cards or mahjong for money at home or any other place                                         | Yes ..... | 1 |
| Q376L Bet on other games of skill like billiards (pool)                                                               | Yes ..... | 1 |
| Q376M Played any other gambling activity excluding raffles or sweeps                                                  | Yes ..... | 1 |

\*\*\*\*\*  
 IF EVER PARTICIPATED IN ANY (Q376A TO Q376M = 1)  
 THEN CONTINUE, ELSE GO TO Q404  
 \*\*\*\*\*

\*\*\*\*\*  
 COMPLETE Q377 FOR EACH SELECTED OPTION AT Q376  
 \*\*\*\*\*



|       |                                                                                                                  |                                                                                                                    |
|-------|------------------------------------------------------------------------------------------------------------------|--------------------------------------------------------------------------------------------------------------------|
| Q377  | During the last 12 months, on how many days have you participated in the following activities?                   |                                                                                                                    |
| Q377A | Played electronic gaming machines such as pokies, poker machines, video draw poker, or blackjack                 | Not at all in the last 12 months .....1<br>1 – 10 days .....2<br>11 – 100 days .....3<br>More than 100 days .....4 |
| Q377B | Bet on horse or greyhound races excluding sweeps                                                                 | Not at all in the last 12 months .....1<br>1 – 10 days .....2<br>11 – 100 days .....3<br>More than 100 days .....4 |
| Q377C | Bought instant scratch tickets                                                                                   | Not at all in the last 12 months .....1<br>1 – 10 days .....2<br>11 – 100 days .....3<br>More than 100 days .....4 |
| Q377D | Played lotto or any other lottery game like Tattslotto, Powerball, the Pools, \$2 Jackpot lottery, or Tatts Keno | Not at all in the last 12 months .....1<br>1 – 10 days .....2<br>11 – 100 days .....3<br>More than 100 days .....4 |
| Q377E | Played Keno at a club, hotel or casino                                                                           | Not at all in the last 12 months .....1<br>1 – 10 days .....2<br>11 – 100 days .....3<br>More than 100 days .....4 |
| Q377F | Played poker for money against other individuals                                                                 | Not at all in the last 12 months .....1<br>1 – 10 days .....2<br>11 – 100 days .....3<br>More than 100 days .....4 |
| Q377G | Played table games at a casino (not including poker), such as Blackjack or Roulette                              | Not at all in the last 12 months .....1<br>1 – 10 days .....2<br>11 – 100 days .....3<br>More than 100 days .....4 |
| Q377H | Played casino games on the internet                                                                              | Not at all in the last 12 months .....1<br>1 – 10 days .....2<br>11 – 100 days .....3<br>More than 100 days .....4 |
| Q377I | Played bingo at a club or hall (for cash prizes)                                                                 | Not at all in the last 12 months .....1<br>1 – 10 days .....2<br>11 – 100 days .....3<br>More than 100 days .....4 |
| Q377J | Bet on a sporting event like football, cricket or tennis                                                         | Not at all in the last 12 months .....1<br>1 – 10 days .....2<br>11 – 100 days .....3<br>More than 100 days .....4 |
| Q377K | Played games like cards or mahjong for money at home or any other place                                          | Not at all in the last 12 months .....1<br>1 – 10 days .....2<br>11 – 100 days .....3<br>More than 100 days .....4 |
| Q377L | Bet on other games of skill like billiards (pool)                                                                | Not at all in the last 12 months .....1<br>1 – 10 days .....2<br>11 – 100 days .....3<br>More than 100 days .....4 |

|                                                                      |                                        |   |
|----------------------------------------------------------------------|----------------------------------------|---|
| Q377M Played any other gambling activity excluding raffles or sweeps | Not at all in the last 12 months ..... | 1 |
|                                                                      | 1 – 10 days .....                      | 2 |
|                                                                      | 11 – 100 days .....                    | 3 |
|                                                                      | More than 100 days .....               | 4 |

---

\*\*\*\*\*  
COMPLETE Q378 FOR EACH SELECTED OPTION AT Q376  
\*\*\*\*\*

|       |                                                                                                                  |                                                                         |
|-------|------------------------------------------------------------------------------------------------------------------|-------------------------------------------------------------------------|
| Q378  | In your entire life, on how many days have you participated in the following activities?                         |                                                                         |
| Q378A | Played electronic gaming machines such as pokies, poker machines, video draw poker, or blackjack                 | 1 – 10 days .....1<br>11 – 100 days .....2<br>More than 100 days .....3 |
| Q378B | Bet on horse or greyhound races excluding sweeps                                                                 | 1 – 10 days .....1<br>11 – 100 days .....2<br>More than 100 days .....3 |
| Q378C | Bought instant scratch tickets                                                                                   | 1 – 10 days .....1<br>11 – 100 days .....2<br>More than 100 days .....3 |
| Q378D | Played lotto or any other lottery game like Tattslotto, Powerball, the Pools, \$2 Jackpot lottery, or Tatts Keno | 1 – 10 days .....1<br>11 – 100 days .....2<br>More than 100 days .....3 |
| Q378E | Played Keno at a club, hotel or casino                                                                           | 1 – 10 days .....1<br>11 – 100 days .....2<br>More than 100 days .....3 |
| Q378F | Played poker for money against other individuals                                                                 | 1 – 10 days .....1<br>11 – 100 days .....2<br>More than 100 days .....3 |
| Q378G | Played table games at a casino (not including poker), such as Blackjack or Roulette                              | 1 – 10 days .....1<br>11 – 100 days .....2<br>More than 100 days .....3 |
| Q378H | Played casino games on the internet                                                                              | 1 – 10 days .....1<br>11 – 100 days .....2<br>More than 100 days .....3 |
| Q378I | Played bingo at a club or hall (for cash prizes)                                                                 | 1 – 10 days .....1<br>11 – 100 days .....2<br>More than 100 days .....3 |
| Q378J | Bet on a sporting event like football, cricket or tennis                                                         | 1 – 10 days .....1<br>11 – 100 days .....2<br>More than 100 days .....3 |
| Q378K | Played games like cards or mahjong for money at home or any other place                                          | 1 – 10 days .....1<br>11 – 100 days .....2<br>More than 100 days .....3 |
| Q378L | Bet on other games of skill like billiards (pool)                                                                | 1 – 10 days .....1<br>11 – 100 days .....2<br>More than 100 days .....3 |
| Q378M | Played any other gambling activity excluding raffles or sweeps                                                   | 1 – 10 days .....1<br>11 – 100 days .....2<br>More than 100 days .....3 |

---

\*\*\*\*\*  
 COMPLETE Q379 FOR EACH SELECTED OPTION AT Q376  
 \*\*\*\*\*

- Q379 How old were you (in years) when you first participated in the following activities?
- Q379A Played electronic gaming machines such as pokies, poker machines, video draw poker, or blackjack \_/\_/\_\_ YEARS
- Q379B Bet on horse or greyhound races excluding sweeps \_/\_/\_\_ YEARS
- Q379C Bought instant scratch tickets \_/\_/\_\_ YEARS
- Q379D Played lotto or any other lottery game like Tattsлото, Powerball, the Pools, \$2 Jackpot lottery, or Tatts Keno \_/\_/\_\_ YEARS
- Q379E Played Keno at a club, hotel or casino \_/\_/\_\_ YEARS
- Q379F Played poker for money against other individuals \_/\_/\_\_ YEARS
- Q379G Played table games at a casino (not including poker), such as Blackjack or Roulette \_/\_/\_\_ YEARS
- Q379H Played casino games on the internet \_/\_/\_\_ YEARS
- Q379I Played bingo at a club or hall (for cash prizes) \_/\_/\_\_ YEARS
- Q379J Bet on a sporting event like football, cricket or tennis \_/\_/\_\_ YEARS
- Q379K Played games like cards or mahjong for money at home or any other place \_/\_/\_\_ YEARS
- Q379L Bet on other games of skill like billiards (pool) \_/\_/\_\_ YEARS
- Q379M Played any other gambling activity excluding raffles or sweeps \_/\_/\_\_ YEARS

- 
- Q380 Have you ever gambled at least 10 times in a single year? No .....1  
Yes .....2

- 
- Q381 Have you ever gambled at least once a week for at least 6 months in a row? (This does not have to be in the same gambling activity.) No .....1  
Yes .....2

\*\*\*\*\*  
 IF ANY GAMBLING IN LAST 12 MONTHS  
 (ANY OF Q377A TO Q377M = 2, 3 OR 4) CONTINUE, ELSE GO TO Q383  
 \*\*\*\*\*

- Q382 In terms of your gambling over the last 12 months, which of the following statements is most accurate for you?
- I have only gambled online in the last 12 months .....1
- I have mostly gambled online, but I have sometimes gambled offline .....2
- About half of my gambling has been online and half has been offline .....3
- I have mostly gambled offline, but I have sometimes gambled online .....4
- I have never gambled on the internet in the last 12 months .....5

\*\*\*\*\*  
 IF GAMBLED ONLINE IN LAST 12 MONTHS (Q382 = 1 TO 4), CONTINUE  
 ELSE GO TO Q386  
 \*\*\*\*\*

- Q383 What year did you first start using the internet for gambling purposes?
- Before 1995 .....1
- 1995 .....2
- 1996 .....3
- 1997 .....4
- 1998 .....5
- 1999 .....6
- 2000 .....7
- 2001 .....8
- 2002 .....9
- 2003 .....10
- 2004 .....11
- 2005 .....12
- 2006 .....13
- 2007 .....14
- 2008 .....15
- 2009 .....16
- 2010 .....17
- 2011 .....18
- 2012 .....19
- 2013 .....20
- 2014 .....21
- 2015 .....22
- 2016 .....23
- 2017 .....24
- 2018 .....25
- 2019 .....26

- Q384 Thinking about the past 12 months, what percentage of the total amount of money you have wagered on all types of gambling has been online? \_\_\_\_\_/\_\_\_\_\_/\_\_\_\_ PERCENT  
 Enter a number between 1 (for 1 % of the total amount of money) and 100 (for 100 % of the total amount of money). Do not enter decimals.

- Q385 Thinking about the past 12 months, what percentage of your total time spent gambling has been online? \_\_\_\_\_/\_\_\_\_\_/\_\_\_\_ PERCENT  
 Enter a number between 1 (for 1 % of the total amount of time) and 100 (for 100 % of the total amount of time). Do not enter decimals.

\*\*\*\*\*

IF EVER GAMBLED AT LEAST 10 TIMES IN A YEAR OR AT LEAST  
WEEKLY FOR 6 MONTHS (Q380 = 2 OR Q381 = 2), CONTINUE  
ELSE GO TO Q404

\*\*\*\*\*

Q386 These next questions ask you about experiences people sometimes have with gambling.

|                                                                                                                                              |                                                                                      |
|----------------------------------------------------------------------------------------------------------------------------------------------|--------------------------------------------------------------------------------------|
| Q386A Have you ever bet more than you could really afford to lose?                                                                           | Never .....1<br>1 - 2 times .....2<br>3 - 5 times .....3<br>More than 5 times .....4 |
| Q386B Have you ever needed to gamble with larger amounts of money to get the same feeling of excitement?                                     | Never .....1<br>1 - 2 times .....2<br>3 - 5 times .....3<br>More than 5 times .....4 |
| Q386C When you gambled, did you ever go back another day to try to win back the money you lost?                                              | Never .....1<br>1 - 2 times .....2<br>3 - 5 times .....3<br>More than 5 times .....4 |
| Q386D Have you ever borrowed money or sold anything to get money to gamble?                                                                  | Never .....1<br>1 - 2 times .....2<br>3 - 5 times .....3<br>More than 5 times .....4 |
| Q386E Have you ever felt that you might have a problem with gambling?                                                                        | Never .....1<br>1 - 2 times .....2<br>3 - 5 times .....3<br>More than 5 times .....4 |
| Q386F Has gambling ever caused you any health problems, including stress or anxiety?                                                         | Never .....1<br>1 - 2 times .....2<br>3 - 5 times .....3<br>More than 5 times .....4 |
| Q386G Have people criticised your betting or told you that you had a gambling problem, regardless of whether or not you thought it was true? | Never .....1<br>1 - 2 times .....2<br>3 - 5 times .....3<br>More than 5 times .....4 |
| Q386H Has your gambling caused any financial problems for you or your household?                                                             | Never .....1<br>1 - 2 times .....2<br>3 - 5 times .....3<br>More than 5 times .....4 |
| Q386I Have you felt guilty about the way you gamble or what happens when you gamble?                                                         | Never .....1<br>1 - 2 times .....2<br>3 - 5 times .....3<br>More than 5 times .....4 |

---

Q387 NOT USED FOR PARTICIPANT INPUT

---

\*\*\*\*\*

IF GAMBLINGSORE IS  $\geq 3$  (SUM OF VALUES FROM Q386 IS  $\geq 12$ ),  
CONTINUE, ELSE GO TO Q404

\*\*\*\*\*

Q388 Some of these questions may seem similar to ones that have already been asked, but there are some slight differences in the wording that may change the meaning. Because experts don't always agree on the best way to measure gambling experiences, we are trying several different approaches. Your answers will help us to better understand the correct ways to ask such questions. Remember that the following questions are about your entire lifetime, so please indicate if you have ever had any of these experiences.

Q389 Has there ever been a period lasting two weeks or longer when you ...

|                                                                     |           |   |
|---------------------------------------------------------------------|-----------|---|
| Q389A Spent a lot of time thinking about your gambling experiences? | No .....  | 1 |
|                                                                     | Yes ..... | 2 |

|                                                                                                                                    |           |   |
|------------------------------------------------------------------------------------------------------------------------------------|-----------|---|
| Q389B Spent a lot of time planning future gambling ventures or bets, or thinking about ways of getting money with which to gamble? | No .....  | 1 |
|                                                                                                                                    | Yes ..... | 2 |

|                                                                                                                                         |           |   |
|-----------------------------------------------------------------------------------------------------------------------------------------|-----------|---|
| Q389C Needed to gamble with increasing amounts of money or with larger bets than before in order to get the same feeling of excitement? | No .....  | 1 |
|                                                                                                                                         | Yes ..... | 2 |

|                                                                       |           |   |
|-----------------------------------------------------------------------|-----------|---|
| Q390 Have you ever tried to stop, cut down, or control your gambling? | No .....  | 1 |
|                                                                       | Yes ..... | 2 |

\*\*\*\*\*  
IF EVER TRIED (Q390 = 2) CONTINUE  
ELSE GO TO Q395  
\*\*\*\*\*

|                                                                                 |                 |
|---------------------------------------------------------------------------------|-----------------|
| Q391 How many times have you tried to stop, cut down, or control your gambling? | _ / _ / _ TIMES |
|---------------------------------------------------------------------------------|-----------------|

|                                                                                           |                            |   |
|-------------------------------------------------------------------------------------------|----------------------------|---|
| Q392 Have you ever tried to stop, cut down, or control your gambling, but were unable to? | No .....                   | 1 |
|                                                                                           | Yes, once or twice .....   | 2 |
|                                                                                           | Yes, 3 or more times ..... | 3 |

|                                                                                                                               |           |   |
|-------------------------------------------------------------------------------------------------------------------------------|-----------|---|
| Q393 On one or more of the times when you tried to stop, cut down, or control your gambling, were you restless and irritable? | No .....  | 1 |
|                                                                                                                               | Yes ..... | 2 |

|       |                                                                                                                                                                                |                                                                       |
|-------|--------------------------------------------------------------------------------------------------------------------------------------------------------------------------------|-----------------------------------------------------------------------|
| Q394  | On one or more of the times when you tried to stop, cut down, or control your gambling, did you ever experience any of the following more than usual?                          |                                                                       |
|       | Q394A Cravings or urges to gamble?                                                                                                                                             | No .....1<br>Yes .....2                                               |
|       | Q394B Sadness or depressed mood?                                                                                                                                               | No .....1<br>Yes .....2                                               |
|       | Q394C Anger                                                                                                                                                                    | No .....1<br>Yes .....2                                               |
|       | Q394D Difficulty sleeping                                                                                                                                                      | No .....1<br>Yes .....2                                               |
|       | Q394E Difficulty concentrating                                                                                                                                                 | No .....1<br>Yes .....2                                               |
| <hr/> |                                                                                                                                                                                |                                                                       |
| Q395  | Have you ever gambled as a way to escape from personal problems?                                                                                                               | No .....1<br>Yes .....2                                               |
| <hr/> |                                                                                                                                                                                |                                                                       |
| Q396  | Have you ever gambled to relieve uncomfortable feelings such as guilt, anxiety, helplessness or depression?                                                                    | No .....1<br>Yes .....2                                               |
| <hr/> |                                                                                                                                                                                |                                                                       |
| Q397  | Has there ever been a period when, if you lost money gambling one day, you would often return another day to get even?                                                         | No .....1<br>Yes, once or twice .....2<br>Yes, 3 or more times .....3 |
| <hr/> |                                                                                                                                                                                |                                                                       |
| Q398  | Have you ever lied to family members, friends or others about how much you gambled or how much money you lost gambling?                                                        | No .....1<br>Yes, once or twice .....2<br>Yes, 3 or more times .....3 |
| <hr/> |                                                                                                                                                                                |                                                                       |
| Q399  | Have you ever deliberately written a cheque that bounced, or stolen or taken things that didn't belong to you in order to gamble?                                              | No .....1<br>Yes .....2                                               |
| <hr/> |                                                                                                                                                                                |                                                                       |
| Q400  | Has your gambling ever caused serious or repeated problems in your relationships with any of your family members or friends?                                                   | No .....1<br>Yes .....2                                               |
| <hr/> |                                                                                                                                                                                |                                                                       |
| Q401  | Has your gambling ever caused you problems in school, or to lose a job, have trouble with your job, or interfered with your career?                                            | No .....1<br>Yes .....2                                               |
| <hr/> |                                                                                                                                                                                |                                                                       |
| Q402  | Have you ever needed to ask family members or anyone else to lend you money or otherwise bail you out of a desperate money situation that was largely caused by your gambling? | No .....1<br>Yes .....2                                               |
| <hr/> |                                                                                                                                                                                |                                                                       |



|       |                                                                                                                                                      |                         |
|-------|------------------------------------------------------------------------------------------------------------------------------------------------------|-------------------------|
| Q403  | Please think about the 12-month period in your life when you experienced the most problems related to gambling. Which experiences did you have then? |                         |
| Q403A | Spent a lot of time thinking about gambling experiences                                                                                              | No .....1<br>Yes .....2 |
| Q403B | Spent a lot of time planning future gambling or thinking about ways of getting money to gamble                                                       | No .....1<br>Yes .....2 |
| Q403C | Needed to gamble with increasing amounts of money to get the same feeling of excitement                                                              | No .....1<br>Yes .....2 |
| Q403D | Unable to stop, cut down or control gambling                                                                                                         | No .....1<br>Yes .....2 |
| Q403E | Restless or irritable when you tried to stop, cut down or control gambling                                                                           | No .....1<br>Yes .....2 |
| Q403F | Gambling to escape from personal problems                                                                                                            | No .....1<br>Yes .....2 |
| Q403G | Gambling to relieve feelings of guilt, anxiety, helplessness or depression                                                                           | No .....1<br>Yes .....2 |
| Q403H | After losing money, you would often return another day to get even                                                                                   | No .....1<br>Yes .....2 |
| Q403I | Lied to family members, friends or others about gambling or money lost gambling                                                                      | No .....1<br>Yes .....2 |
| Q403J | Wrote a cheque that bounced, or took something that didn't belong to you to pay for gambling                                                         | No .....1<br>Yes .....2 |
| Q403K | Gambling caused serious or repeated problems in relationships with family or friends                                                                 | No .....1<br>Yes .....2 |
| Q403L | Gambling caused problems in school, or work, or loss of a job, or interfered with your career                                                        | No .....1<br>Yes .....2 |
| Q403M | Needed family members or anyone else to provide money to get out of a desperate situation caused by gambling                                         | No .....1<br>Yes .....2 |

---

Q404 Thanks for taking the time to answer these questions!

---

## Module 10 – Headaches and migraine

Q405 Have you ever had migraine or recurrent attacks of headaches? No .....1  
Yes .....2

\*\*\*\*\*

IF YES (Q405 = 2) CONTINUE  
ELSE GO TO Q428

\*\*\*\*\*

---

Q406 Associated with your headaches, have you ever had recurrent attacks of any of the following?

Q406A Stomach or intestinal pain/dysfunction No .....1  
Yes .....2

Q406B Nausea, vomiting or diarrhoea No .....1  
Yes .....2

Q406C Visual problems such as blurring, showers of light, blind spots, or double vision No .....1  
Yes .....2

---

Q407 Would you describe the pain associated with your headaches as: Mild .....1  
Moderate .....2  
Severe .....3  
Unbearable .....4

---

Q408 How much do your headaches impair your daily activities? Would you say... Not at all .....1  
Interfere with work or social life ...2  
Must stay home from work or school .....3  
Must remain in a dark room (i.e. go to bed) .....4

---

Q409 Would you describe the headache pain you usually experience as:

Q409A Throbbing, pulsating or pounding - like being stabbed with a sharp knife No .....1  
Yes .....2

Q409B Pressing - like a weight pushing down on your head No .....1  
Yes .....2

Q409C Squeezing - like a tight band around your head No .....1  
Yes .....2

---

Q410 Do the headaches usually occur on one side of the head? No (pain on both sides) .....1  
Left .....2  
Right .....3  
Either (pain is sometimes on the left and other times on the right side) .....4

---

Q411 Associated with your headaches, do you experience enhanced sensitivity to:

Q411A Light No .....1  
Yes .....2

Q411B Smell - such as perfume, petrol or smoke No .....1  
Yes .....2

Q411C Noise No .....1  
Yes .....2

---

Q412 Do these headaches occur in an attack-like manner or are they continuous? Attack-like .....1  
Continuous .....2

---

Q413 How old were you the first time you had these headaches (age in years)? \_\_\_/\_\_\_/\_\_\_ YEARS

---

Q414 How old were you the last time you had these headaches (age in years)? \_\_\_/\_\_\_/\_\_\_ YEARS

---

Q415 How many of these headaches have you had during your lifetime? 1-2 .....1  
3-4 .....2  
5-10 .....3  
11-50 .....4  
51-100 .....5  
More than 100 .....6

---

Q416 On average, how long does/did a typical untreated or unsuccessfully treated migraine/headache episode last? Please choose one time frame only. \_\_\_/\_\_\_ DAYS  
\_\_\_/\_\_\_ HOURS  
\_\_\_/\_\_\_ MINUTES

---

Q417 On average, how often do / did you have these headaches? Every day .....1  
5-6 days per week .....2  
3-4 days per week .....3  
2 days per week .....4  
1 day per week .....5  
2-3 days per month .....6  
1 day per month .....7  
3-11 days per year .....8  
Less often .....9

---

Q418 Are your headaches aggravated by walking up or down stairs or similar routine physical activity? No .....1  
Yes .....2

---

Q419 Associated with your headaches, have you ever had:

Q419A Difficulties speaking No .....1  
Yes .....2

Q419B One-sided numbness or weakness No .....1  
Yes .....2

---

- Q420 With your headaches, have you ever had visual disturbances lasting several minutes (e.g. deficiency in your visual fields, scintillating zigzag pattern, sparks or stars in your visual field, blurred or double vision, or some other visual disturbance)?
- No .....1  
Yes .....2

\*\*\*\*\*  
IF FEMALE (Q4 = 2) CONTINUE, ELSE GO TO Q427  
\*\*\*\*\*

- Q421 When you experience your headaches, do they occur between 2 days before and 2 days after your period starts? If you no longer menstruate, please answer according to how your headaches were when you did menstruate.
- No .....1  
Yes, I have/had these headaches exclusively around this period of menstruation in at least two out of three menstrual cycles and at no other times of the cycle .....2  
Yes, I have/had these headaches around this period of menstruation in at least two out of three menstrual cycles and additionally at other times of the cycle .....3  
Yes, I have/had these headaches around this period of menstruation, but in less than two out of three menstrual cycles .....4  
Don't know .....5

\*\*\*\*\*  
IF NO (Q421 = 1) OR EXCLUSIVELY AROUND MENSTRUATION (Q421 = 2),  
GO TO Q424  
ELSE CONTINUE  
\*\*\*\*\*

- Q422 Approximately what percentage of your headaches occur around menstruation? Please click on the shaded line to register your response, even if the answer is "0".
- \_\_\_/\_\_\_ PERCENT

- Q423 Do / did your headaches around menstruation differ from your headaches at other times?
- No .....1  
Yes .....2

- Q424 Do / did you get your headaches with oral contraceptive (Pill) use? headaches at other times?
- No .....1  
Yes .....2  
Not applicable - I've never used oral contraceptives .....3  
Don't know .....4

\*\*\*\*\*  
IF Q322 NOT YET PRESENTED THEN CONTINUE, ELSE GO TO Q426  
\*\*\*\*\*

- Q425 Have you reached menopause?
- No .....1  
Yes .....2

\*\*\*\*\*  
 IF HAS REACHED MENOPAUSE (Q322 = 2 OR Q425 = 2) CONTINUE,  
 ELSE GO TO Q427  
 \*\*\*\*\*

|      |                                                                        |                                                                                                                                                                                                                                                                                                                                                                                                                                                 |
|------|------------------------------------------------------------------------|-------------------------------------------------------------------------------------------------------------------------------------------------------------------------------------------------------------------------------------------------------------------------------------------------------------------------------------------------------------------------------------------------------------------------------------------------|
| Q426 | After you reached menopause, did the frequency of your headaches ... ? | Remain constant .....1<br>Increase, but only the headaches<br>occurring around menstruation .....2<br>Increase, both the headaches<br>occurring around menstruation<br>and at other times .....3<br>Decrease, but only the headaches<br>occurring around menstruation .....4<br>Decrease, both the headaches<br>around menstruation and at other<br>times .....5<br>Not applicable - I haven't reached<br>menopause .....6<br>Don't know .....7 |
|------|------------------------------------------------------------------------|-------------------------------------------------------------------------------------------------------------------------------------------------------------------------------------------------------------------------------------------------------------------------------------------------------------------------------------------------------------------------------------------------------------------------------------------------|

|      |                                                                                                                      |                                                                                                                                                                                                                                                                                                                                                                                                                                            |
|------|----------------------------------------------------------------------------------------------------------------------|--------------------------------------------------------------------------------------------------------------------------------------------------------------------------------------------------------------------------------------------------------------------------------------------------------------------------------------------------------------------------------------------------------------------------------------------|
| Q427 | Which of the following medications have you ever taken for your migraine or headaches? Please select all that apply. | Sumatriptan (e.g. Imigran, Iptam,<br>Sumatab, Sumagran, Sumatran) .....1<br>Zolmitriptan (e.g. Zomig, Zoltrip) ..2<br>Rizatriptan (e.g. Maxalt) .....3<br>Naratriptan (e.g. Naramig) .....4<br>Eletriptan (e.g. Relpax) .....5<br>Pizotifen (e.g. Sandomigran) .....6<br>Cyproheptadine (e.g. Periactin) ....7<br>Topiramate (e.g. Topamax,<br>Epiramax, Tamate) .....8<br>Botulinum toxin type A (Botox) ...9<br>Other (specify): .....10 |
|      |                                                                                                                      | I have never taken medication for<br>migraine or headaches .....11                                                                                                                                                                                                                                                                                                                                                                         |

Q428 Another section of the questionnaire finished - well done!

**Module 11 – Family**

Q429 Is your biological mother still alive? No .....1  
 Yes .....2  
 Don't know .....3

\*\*\*\*\*  
 IF YES (Q429 = 2) CONTINUE  
 IF NO (Q429 = 1) GO TO Q431  
 ELSE GO TO Q434  
 \*\*\*\*\*

---

Q430 How old is your biological mother now? \_\_\_/\_\_\_/\_\_\_ YEARS

\*\*\*\*\*  
 GO TO Q434  
 \*\*\*\*\*

---

Q431 How old was your biological mother when she died? \_\_\_/\_\_\_/\_\_\_ YEARS

---

Q432 In what year did she die? \_\_\_/\_\_\_/\_\_\_

---

Q433 What was her cause of death? \_\_\_\_\_

---

Q434 Is your biological father still alive? No .....1  
 Yes .....2  
 Don't know .....3

\*\*\*\*\*  
 IF YES (Q434 = 2) CONTINUE  
 IF NO (Q434 = 1) GO TO Q436  
 ELSE GO TO Q439  
 \*\*\*\*\*

---

Q435 How old is your biological father now? \_\_\_/\_\_\_/\_\_\_ YEARS

\*\*\*\*\*  
 GO TO Q439  
 \*\*\*\*\*

---

Q436 How old was your biological father when he died? \_\_\_/\_\_\_/\_\_\_ YEARS

---

Q437 In what year did he die? \_\_\_/\_\_\_/\_\_\_

---

Q438 What was his cause of death? \_\_\_\_\_

---

Q439 Are you a twin (or triplet, etc.) No .....1  
 Yes .....2

Q440 How many brothers do you have? Please include full, half, step and adopted brothers, including any who have died. \_/\_

\*\*\*\*\*  
 IF NONE, GO TO Q442 ELSE CONTINUE  
 \*\*\*\*\*

---

\*\*\*\*\*  
 FOR EACH BROTHER (MAXIMUM 8), LOOP THROUGH Q441A TO Q441C  
 \*\*\*\*\*

Q441 Please tell us a little bit more about your brother(s)

Q441A Brother's relationship to you

|               |   |
|---------------|---|
| Full .....    | 1 |
| Half .....    | 2 |
| Step .....    | 3 |
| Adopted ..... | 4 |

Q441B Brother's year of birth \_/\_/\_

Q441C Brother's age at death (if brother is still alive, leave blank) \_/\_ YEARS

---

Q442 How many sisters do you have? Please include full, half, step and adopted sisters, including any who have died. \_/\_

\*\*\*\*\*  
 IF NONE, GO TO Q444, ELSE CONTINUE  
 \*\*\*\*\*

---

\*\*\*\*\*  
 FOR EACH SISTER (MAXIMUM 8), LOOP THROUGH Q443A TO Q443C  
 \*\*\*\*\*

Q443 Please tell us a little bit more about your sister(s)

Q443A Sister's relationship to you

|               |   |
|---------------|---|
| Full .....    | 1 |
| Half .....    | 2 |
| Step .....    | 3 |
| Adopted ..... | 4 |

Q443B Sister's year of birth \_/\_/\_

Q443C Sister's age at death (if sister is still alive, leave blank) \_/\_ YEARS

---

Q444 How many children do you have? Please include biological children, stepchildren and adopted children, including any who have died. \_/\_

\*\*\*\*\*  
 IF NONE, GO TO Q446, ELSE CONTINUE  
 \*\*\*\*\*

\*\*\*\*\*  
 FOR EACH CHILD (MAXIMUM 10), LOOP THROUGH Q445A TO Q445D  
 \*\*\*\*\*

Q445 Please tell us a little bit more about your child/children

|                                                                   |                        |             |
|-------------------------------------------------------------------|------------------------|-------------|
| Q445A Sex                                                         | Male                   | 1           |
|                                                                   | Female                 | 2           |
| Q445B Child's relationship to you                                 | Biological child ..... | 1           |
|                                                                   | Step child .....       | 2           |
|                                                                   | Adopted child .....    | 3           |
| Q445C Child's year of birth                                       |                        | __/__/__    |
| Q445D Child's age at death (if child is still alive, leave blank) |                        | __/__ YEARS |

---

Q446 Thank you for completing this section of the questionnaire!

---



## Finalise and submit survey

Q447 Just a couple of final questions about your experience in completing our online questionnaire.

---

|      |                                                    |                   |   |
|------|----------------------------------------------------|-------------------|---|
| Q448 | Did you find the length of the questionnaire ... ? | Too brief .....   | 1 |
|      |                                                    | About right ..... | 2 |
|      |                                                    | Too long .....    | 3 |

---

|      |                                                 |                            |   |
|------|-------------------------------------------------|----------------------------|---|
| Q449 | Did you find completing the questionnaire ... ? | Not at all enjoyable ..... | 1 |
|      |                                                 | Moderately enjoyable ..... | 2 |
|      |                                                 | Very enjoyable .....       | 3 |

---

Q450 Is there any other information that you would like to share that relates to this study? (Maximum length 500 characters) \_\_\_\_\_

---

Q451 Select "Finalise and submit survey" to indicate that you have completed the survey. Or, select "Table of Contents" to continue the survey.

---
