# Supplementary material for: Cohort profile: the Australian genetics of depression study
Source: PubMed Central journal article supplement — BMJ Open. 2020 May 26;10(5):e032580. doi: 10.1136/bmjopen-2019-032580 (PMC7259831; doi:10.1136/bmjopen-2019-032580), 2020-05-26
Supplement: bmjopen-2019-032580supp002.pdf [file bmjopen-2019-032580supp002.pdf]

Supplementary Table 1. Rate of completion of satellite modules in Australian Genetics of Depression Study.

| Module      | Number of Participants | Percentage of Participants Completed |
|-------------|------------------------|--------------------------------------|
| Core Module | 20679                  | 100                                  |
| Module 2    | 15153                  | 73.2                                 |
| Module 3    | 15782                  | 76.3                                 |
| Module 4    | 15074                  | 72.9                                 |
| Module 5    | 14682                  | 71.0                                 |
| Module 6    | 14266                  | 69.0                                 |
| Module 7    | 13874                  | 67.1                                 |
| Module 8    | 11874                  | 57.4                                 |
| Module 9    | 13919                  | 67.3                                 |
| Module 10   | 13706                  | 66.2                                 |
| Module 11   | 15374                  | 74.3                                 |

## Supplementary Figures

Supp Figure 1a-d.

Screenshots from the Australian Genetics of Depression study

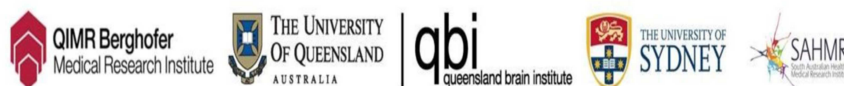

### Genetics of risk and response to treatment of depression

Welcome to the online questionnaire. Thank you for taking the time to assist us in our research on depression.

The questionnaire that follows is the core module. It should take approximately 10 to 15 minutes to complete.

To make it easier for you to participate, you can start the questionnaire, log off and return to it later by clicking on the link in the e-mail we have sent you. This link will return you to the last question you answered in the questionnaire.

**Please note that if you would like to complete the questionnaire over multiple sessions, you need to use the same device and browser, which must have 'Cookies' enabled.** Some devices have cookies disabled as a default setting, while specific Internet settings such as 'private browsing' also disable cookies. You may need to check your device and browser settings if intending to do the survey over multiple sessions.

Once this core questionnaire is completed you will be presented with a table of contents containing several modules. You may complete the other modules in any order you like. Depending on your answers, the series of modules should take around 60 minutes to complete. Once again, you can start and leave these modules as you please using the questionnaire link we emailed you.

**Please consider your answers carefully, as you cannot go back during the questionnaire. Please do not use the "back" button on your internet browser.**

Q9 Have you ever been diagnosed with any of the following? *Please select all that apply.*

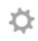

Depression

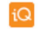

Bipolar disorder

Premenstrual dysphoric mood disorder

Schizophrenia

Anorexia nervosa

Bulimia

Attention-deficit/hyperactivity disorder (ADD/ADHD)

Autism spectrum disorder (Autism, Asperger's disorder)

Tourette's disorder

Anxiety disorder (Generalised anxiety disorder)

Panic disorder

Obsessive compulsive disorder

Hoarding disorder

Posttraumatic stress disorder (PTSD)

Specific phobia (e.g. animals, heights, storms, blood / injection / injury, flying, enclosed spaces)

Seasonal affective disorder (SAD)

Social anxiety disorder (also known as Social phobia)

Agoraphobia

Personality disorder

Substance use disorder

None of the above

0% 100%

Have you ever taken any of the following antidepressants (even if it wasn't for depression or anxiety)? *Please select all that apply.*

- Sertraline (e.g. Zoloft, Eleva, Sertra, Sertracor, Setrona, Xydep)
- Escitalopram (e.g. Lexapro, Cilopam, Escicor, Esipram, Esitalo, Lexam, LoxaLate)
- Venlafaxine (e.g. Efexor, Altven, Elaxine, Enlafax, Venla, Venlexor)
- Amitriptyline (e.g. Endep)
- Mirtazapine (e.g. Avanza, Remeron, Milivin, Axit, Aurozapine, Mirtazon)
- Desvenlafaxine (e.g. Pristiq, Desfax)
- Citalopram (e.g. Cipramil, Celapram, Celica, Ciazil, Citalo, Talam)
- Fluoxetine (e.g. Prozac, Auscap, Lovan, Zactin)
- Duloxetine (e.g. Cymbalta, Andeptra, Coperin, Deotine, Depreta, Drulox)
- Paroxetine (e.g. Aropax, Paxtine, Extine, Roxet)
- A different antidepressant that isn't listed above
- I have never taken antidepressants

← → ↻ qimraz1.qualtrics.com/jfe/form/SV\_eYDkSLcMetWlJcD

0% 100%

  |   

Thank you for completing the Core Module of our online survey. The following sections of the survey may be completed in any order you wish.

If you are completing this survey on a mobile device, you may need to click on the Table of Contents symbol to move between survey modules. It looks like this  and is located at the top left corner of each screen.

When you are finished, select the "Finalise and Submit Survey" link below.

- [Anxieties and Phobias \(approx. 5 minutes\)](#)
- [General Physical and Mental Health \(approx. 3 minutes\)](#)
- [Alcohol, Tobacco and Other Substances \(approx. 10 minutes\)](#)
- [Experiences of Health Care \(approx. 4 minutes\)](#)
- [Thoughts, Feelings and Behaviours \(approx. 10 minutes\)](#)
- [Life Events \(approx. 10 minutes\)](#)
- [Work and Sleep \(approx. 15 minutes\)](#)
- [General Health and Lifestyle \(approx. 15 minutes\)](#)
- [Games and Gambling \(approx. 3 minutes\)](#)
- [Headaches and Migraines \(approx. 5 minutes\)](#)
- [Family \(approx. 2 minutes\)](#)
- [Finalise and Submit Survey](#)
